# Supplementary material for: Randomised controlled trial of exercise to prevent shoulder problems in women undergoing breast cancer treatment: study protocol for the prevention of shoulder problems trial (UK PROSPER)
Source: PubMed Central journal article supplement (PMC5875650; doi:10.1136/bmjopen-2017-019078), 2018-03-23
Supplement: bmjopen-2017-019078.draft_revisions.pdf [file bmjopen-2017-019078.draft_revisions.pdf]

# BMJ Open

BMJ Open is committed to open peer review. As part of this commitment we make the peer review history of every article we publish publicly available.

When an article is published we post the peer reviewers' comments and the authors' responses online. We also post the versions of the paper that were used during peer review. These are the versions that the peer review comments apply to.

The versions of the paper that follow are the versions that were submitted during the peer review process. They are not the versions of record or the final published versions. They should not be cited or distributed as the published version of this manuscript.

BMJ Open is an open access journal and the full, final, typeset and author-corrected version of record of the manuscript is available on our site with no access controls, subscription charges or pay-per-view fees (<http://bmjopen.bmj.com>).

If you have any questions on BMJ Open's open peer review process please email [editorial.bmjopen@bmj.com](mailto:editorial.bmjopen@bmj.com)

# BMJ Open

**A randomised controlled trial of exercise to prevent shoulder problems in women undergoing breast cancer treatment: study protocol for the Prevention of Shoulder Problems Trial (PROSPER)**

|                               |                                                                                                                                                                                                                                                                                                                                                                                                                                                                                                                                                                                                                                                                                                                                                                                                                                                                                                                                                                                                    |
|-------------------------------|----------------------------------------------------------------------------------------------------------------------------------------------------------------------------------------------------------------------------------------------------------------------------------------------------------------------------------------------------------------------------------------------------------------------------------------------------------------------------------------------------------------------------------------------------------------------------------------------------------------------------------------------------------------------------------------------------------------------------------------------------------------------------------------------------------------------------------------------------------------------------------------------------------------------------------------------------------------------------------------------------|
| Journal:                      | <i>BMJ Open</i>                                                                                                                                                                                                                                                                                                                                                                                                                                                                                                                                                                                                                                                                                                                                                                                                                                                                                                                                                                                    |
| Manuscript ID                 | bmjopen-2017-019078                                                                                                                                                                                                                                                                                                                                                                                                                                                                                                                                                                                                                                                                                                                                                                                                                                                                                                                                                                                |
| Article Type:                 | Protocol                                                                                                                                                                                                                                                                                                                                                                                                                                                                                                                                                                                                                                                                                                                                                                                                                                                                                                                                                                                           |
| Date Submitted by the Author: | 11-Aug-2017                                                                                                                                                                                                                                                                                                                                                                                                                                                                                                                                                                                                                                                                                                                                                                                                                                                                                                                                                                                        |
| Complete List of Authors:     | Bruce, Julie; University of Warwick, Warwick Clinical Trials Unit<br>Williamson, Esther; Nuffield Department of Orthopaedics, Rheumatology and Musculoskeletal Sciences, University of Oxford, United Kingdom. , Centre for Rehabilitation Research in Oxford<br>Lait, Clare; Gloucestershire Care Services NHS Trust<br>Richmond, Helen ; University of Warwick, Warwick Clinical Trials Unit<br>Betteley, Lauren; University of Warwick Warwick Medical School, Warwick Clinical Trials Unit<br>Lall, Ranjit; University of Warwick, Warwick Clinical Trials Unit<br>Petrou, Stavros; University of Warwick, Warwick Medical School<br>Rees, Sophie; University of Warwick, Warwick Clinical Trials Unit<br>Lamb, Sarah; University of Oxford, Nuffield Department of Orthopaedics, Rheumatology and Musculoskeletal Sciences<br>Thompson, Alastair; University of Texas M.D. Anderson Cancer Center, Department of Breast Surgical Oncology and Department of Translational Molecular Pathology |
| Keywords:                     | Breast surgery < SURGERY, Clinical trials < THERAPEUTICS, Rehabilitation medicine < INTERNAL MEDICINE                                                                                                                                                                                                                                                                                                                                                                                                                                                                                                                                                                                                                                                                                                                                                                                                                                                                                              |
|                               |                                                                                                                                                                                                                                                                                                                                                                                                                                                                                                                                                                                                                                                                                                                                                                                                                                                                                                                                                                                                    |

SCHOLARONE™  
Manuscripts

1  
2  
3 **A randomised controlled trial of exercise to prevent shoulder problems in women**  
4 **undergoing breast cancer treatment: study protocol for the Prevention of Shoulder**  
5 **Problems Trial (PROSPER)**  
6  
7

8  
9  
10 **Authors:** Julie Bruce<sup>1</sup>, Esther Williamson<sup>2</sup>, Clare Lait<sup>3</sup>, Helen Richmond<sup>1</sup>, Lauren Betteley<sup>1</sup>,  
11 Ranjit Lall<sup>1</sup>, Stavros Petrou<sup>1</sup>, Sophie Rees<sup>1</sup>, Sarah E Lamb<sup>1,2</sup> and Alastair Thompson<sup>4</sup> on  
12 behalf of the PROSPER Study Group  
13  
14  
15

16  
17  
18 **Author affiliations**  
19

- 20  
21 1. Warwick Clinical Trials Unit, Division of Health Sciences, University of Warwick,  
22 Coventry CV4 7AL, UK  
23  
24 2. Nuffield Department of Orthopaedics Rheumatology & Musculoskeletal Sciences,  
25 University of Oxford, Windmill Road, Oxford, OX3 7LD, UK  
26  
27 3. Gloucestershire Care Services NHS Trust, 1010 Gloucester Business Park, Pioneer  
28 Avenue, Brockworth, Gloucester, GL3 4AW, UK  
29  
30 4. Department of Breast Surgical Oncology & Department of Translational Molecular  
31 Pathology, University of Texas M.D. Anderson Cancer Center, 1400 Pressler Drive,  
32 Houston, Texas, US  
33  
34  
35  
36  
37  
38

39 **Corresponding author:** Professor Julie Bruce; [julie.bruce@warwick.ac.uk](mailto:julie.bruce@warwick.ac.uk)  
40  
41  
42  
43  
44  
45  
46  
47  
48  
49  
50  
51  
52  
53  
54  
55  
56  
57  
58  
59  
60

## Abstract (300 words)

### Introduction

Musculoskeletal shoulder problems are common after breast cancer treatment. Early postoperative exercises targeting the upper limb may improve shoulder function. This protocol describes a National Institute for Health Research funded randomised controlled trial to evaluate the clinical and cost-effectiveness of an early supervised exercise programme compared to usual care, for women at high risk of developing shoulder problems after breast cancer surgery.

### Methods and Analysis

This pragmatic two-armed, multicentre RCT is underway within secondary care in the United Kingdom. PROSPER aims to recruit 350 women from approximately 15 UK centres with follow-up at 6 weeks, 6 and 12 months after randomisation. Recruitment processes and intervention development were optimised through qualitative research during a six-month internal pilot phase. Participants are randomised to the PROSPER intervention or best practice usual care only. The PROSPER intervention is delivered by physiotherapists and incorporates three main components: shoulder-specific exercises targeting range of movement and strength; general physical activity; and behavioural strategies to encourage adherence and support exercise behaviour. The primary outcome is upper arm function assessed using the Disabilities of the Arm Shoulder and Hand (DASH) questionnaire at 12 months post-randomisation. Secondary outcomes include DASH subscales, acute and chronic pain, complications, health related quality of life, and healthcare resource use. We will interview a subsample of participants (n=10 intervention; n=10 usual care) to explore their experiences of the trial interventions.

### Ethics and Dissemination

Ethical approval was granted from the NHS National Research Ethics Service Committee West Midlands (15/WM/0224) on 20.07.2015. The PROSPER study is the first multicentre UK clinical trial to investigate the clinical and cost-effectiveness of supported exercise in the prevention of shoulder problems in high risk women undergoing breast cancer surgery. The

1  
2  
3 findings will inform future clinical practice and provide valuable insight into the role of  
4  
5 physiotherapy-supported exercise in breast cancer rehabilitation.

6  
7 **Trial registration:** ISRCTN35358984

8  
9 **Protocol version:** Version 2.1; dated 11/01/2017

10  
11 **Funding:** NIHR HTA (Project Number 13/84/10)

## 12 13 14 **Strengths and limitations of this study**

15  
16 Strengths:

- 17  
18 • A large pragmatic study delivering a complex intervention to prevent postoperative health  
19  
20 problems in newly diagnosed cancer patients within secondary care;
- 21  
22 • A strength of the evaluation is the mixed methods approach incorporating embedded  
23  
24 qualitative research and economic analysis

25  
26 Limitations:

- 27  
28 • Recruited participants undergo multiple cancer treatments thus experience a  
29  
30 complicated postoperative recovery pathway.

## Background

Breast cancer is the most common cancer in women in the UK with a 30% increase in incidence since the early 1970s (1). Due to advances in screening and treatment, the survival rate has progressively risen and now two thirds of women will survive for 20 years beyond their breast cancer diagnosis (1). The mainstay treatment is surgery to the breast and axilla, supplemented with chemotherapy, radiotherapy and endocrine therapy, depending upon tumour stage and other clinical criteria. As a consequence of these treatments, upper limb problems such as decreased shoulder range of movement (ROM), impaired strength, chronic pain, sensory disturbances and lymphoedema are common adverse treatment effects (2, 3). Studies suggest that up to 67% of women have arm or shoulder symptoms up to 3 years after treatment (4). Persistent upper limb dysfunction and pain are debilitating, have a negative impact upon sleep, quality of life, physical functioning and emotional wellbeing. Given successes in increasing survival, it is timely to identify strategies to improve the health-related quality of life of women after breast cancer treatment.

Several risk factors for shoulder and upper body problems after breast cancer treatment have been identified, including treatment-related factors, such as type of axillary surgery and radiotherapy (RT), and patient factors such as age, body mass index (BMI), and pre-existing shoulder problems (4, 5). Women undergoing mastectomy compared to breast conserving surgery are at greater risk of postoperative shoulder restrictions (odds ratio (OR) 5.7, 95% confidence interval (CI) 1.03, 31.2) (4). Additionally, those undergoing axillary lymph node clearance (ANC) are at greater risk of postoperative arm complaints compared to those having sentinel lymph node biopsy (SLNB; OR 9.8; 95% CI 3.5, 27.5) (4-6). Radiotherapy (RT), particularly to the axilla or chest wall, increases the odds of shoulder restriction (pooled OR 1.7, 95% CI 1.0, 2.9) and lymphoedema (pooled OR 1.5, 95% CI 1.2, 1.8) compared to women treated without adjuvant RT (4). Women reporting problems in the upper body and shoulder region before surgery are also at increased risk of chronic postoperative pain (5, 7).

1  
2  
3 BMI at time of surgery has been shown to have an independent negative effect on shoulder  
4 external rotation up to seven years after breast cancer treatment, and increased BMI is a risk  
5 factor for chronic postoperative pain and arm lymphoedema (7, 8). It is important that the UK  
6 National Health Service (NHS) provides optimal care for these women at high risk of  
7 developing shoulder problems to ensure recovery and return to usual activities after cancer  
8 treatment.  
9  
10  
11  
12  
13  
14  
15

16  
17 A Cochrane review identified 24 studies (2132 participants) investigating exercise following  
18 breast cancer surgery (9). Six studies (n=354), conducted outside of the UK, found that  
19 structured postoperative exercise significantly improved shoulder ROM in the short and long  
20 term when compared to usual care (9). Ten studies (n=1304) have evaluated timing of  
21 exercise delivery; programmes initiated immediately postoperatively (1-3 days) versus  
22 delayed exercise suggest that early postoperative exercise does significantly improve long-  
23 term shoulder ROM. However, some studies reported an increased risk of wound-related  
24 complications with early exercise, such as seroma and surgical site infection (9). The largest  
25 UK trial to date (n=116 patients), published after the Cochrane review, found that  
26 participants were less likely to develop lymphoedema when exercises were limited to 90° of  
27 shoulder elevation during the first postoperative week compared to those performing  
28 unrestricted exercises (10). These previous trials investigating the efficacy of exercise  
29 following breast cancer surgery have been criticised for being of poor methodological quality  
30 and for omitting important patient-reported outcomes such as function and health-related  
31 quality of life (9). Furthermore, there is ongoing uncertainty around the optimal type, dose,  
32 and timing of exercise after breast cancer treatment. Moreover, none of the trials conducted  
33 to date have investigated the cost-effectiveness of structured exercise programmes after  
34 breast cancer treatment.  
35  
36  
37  
38  
39  
40  
41  
42  
43  
44  
45  
46  
47  
48  
49  
50  
51  
52  
53  
54  
55  
56  
57  
58  
59  
60

## Rationale for a trial

To date, no large scale, high-quality, multicentre RCT investigating the clinical effectiveness of a structured physiotherapy intervention for women undergoing breast cancer surgery has been conducted. Given the lack of knowledge regarding the intensity and duration of exercise interventions after breast cancer surgery, this trial will provide evidence on whether a rigorously designed physiotherapy-led intervention, incorporating behaviour change theory, improves postoperative function and related outcomes, and whether this is cost-effective to deliver in the NHS setting.

## Methods

### Aim

The overall aim of PROSPER is to investigate the clinical and cost-effectiveness of an early supervised exercise programme compared to best practice usual care for women at high risk of shoulder problems after treatment for breast cancer, on outcomes of upper arm function, complications and quality of life. Specific trial objectives are:

1. To develop and refine a complex intervention of physiotherapy-led exercise for women at risk of developing musculoskeletal problems after breast cancer treatment;
2. To assess the acceptability of the exercise programme and outcome measures, optimise participant recruitment and refine trial processes during a six-month internal pilot phase at three clinical centres;
3. Use findings from the internal pilot phase to undertake a definitive RCT in approximately 15 UK NHS breast cancer centres.

This protocol follows guidance from the Standard Protocol Items: Recommendations for Interventional Trials (SPIRIT)(11). Core trial information is presented in Table 1 (WHO Trial Registration Data Set). Figure 1 details the schedule of enrolment, interventions and assessment.



### **Trial design and setting**

A multicentre, pragmatic, parallel, two-arm RCT with an internal pilot study and embedded economic evaluation and qualitative studies. The trial framework is superiority rather than equivalence or exploratory. The trial is currently open and recruiting from 17 NHS tertiary breast cancer centres across England. Participants are randomised in a 1:1 ratio between intervention and control arms.

### **Patient and public involvement (PPI) in trial design**

Four female PPI representatives, all of whom were treated for breast cancer, were consulted during the initial grant preparation, intervention development and trial set up. Our PPI representatives contributed to the design of the intervention and advised on recruitment-related issues; they provided valuable insight into the worries and concerns experienced during cancer treatment.

### **Eligibility Criteria**

Women are eligible to participate in PROSPER if they are: diagnosed with histologically confirmed invasive or non-invasive primary breast cancer scheduled for surgical excision; aged 18 years or over; can comply with the protocol; willing to provide written informed consent; and considered as being at high risk of developing postoperative shoulder problems (Table 2). This is a pragmatic trial and it is important that inclusion criteria reflect contemporary clinical practice. Therefore, women are also eligible where a later decision is made for postoperative radiotherapy (RT) to the axilla and/or supraclavicular region, thus changing their risk status from low to high. 'Late entry' women are eligible for the trial if the decision for postoperative RT is made within six weeks of surgery. Women who have had previous breast surgery (such as excision of a benign tumour or breast cyst) and those women who have had previous contralateral (opposite side) mastectomy, are eligible for invitation providing they fulfil high risk criteria for shoulder problems. Women having

1  
2  
3 immediate reconstruction or bilateral breast surgery are ineligible as the usual NHS  
4 postoperative care pathway often includes routine postoperative physiotherapy. Exclusion  
5 criteria are presented in Table 2.  
6  
7  
8  
9

### 10 **Participant screening, recruitment and consent**

11  
12 Participants are screened and identified from multi-disciplinary team (MDT) meetings and  
13 preoperative breast/oncology clinic lists in secondary care. The initial screening process is  
14 undertaken by a member of the clinical team, research nurse or trained designee. Potentially  
15 eligible patients are approached by clinical or research staff and are given a Patient  
16 Information Sheet (PIS) with further explanation of the trial. Figure 2 summarises participant  
17 flow.  
18  
19  
20  
21  
22  
23  
24  
25

### 26 **Allocation sequence generation and randomisation**

27  
28 Randomisation is based upon a computer-generated algorithm held and controlled centrally  
29 by the Warwick Clinical Trials Unit (WCTU) programming team, independent from the  
30 PROSPER trial team. The WCTU telephone randomisation service is used whereby  
31 randomisation occurs after eligibility and informed consent has been obtained. Concealment  
32 of allocation is maintained. An automated confirmation email of intervention allocation is  
33 generated to the study team. Randomisation is stratified by the following variables: (i) first  
34 versus repeat surgery; (ii) centre; and (iii) whether informed of the need for radiotherapy  
35 within six weeks of surgery. The first variable adjusts for the requirement for any additional  
36 surgery which may change risk status from low to high (e.g. second procedure ANC or  
37 reexcision of surgical margins). The second stratification variable ensures balanced  
38 allocation across each recruitment site. The third variable accounts for late entry to the trial,  
39 thus relates to the timing of intervention delivery and whether participants are randomised  
40 preoperatively (up to the day of surgery) or within the first six weeks postoperatively. Due to  
41 the nature of the study intervention, it is not possible to blind participants or treating  
42 physiotherapists to treatment allocation. However, outcome data collection, data entry, data  
43  
44  
45  
46  
47  
48  
49  
50  
51  
52  
53  
54  
55  
56  
57  
58  
59  
60

1  
2  
3 cleaning and interim statistical analyses are conducted without knowledge of treatment  
4 allocation (blinded).  
5

## 6 **Interventions**

### 7 **Control Arm: Usual Care**

8  
9  
10 Participants allocated to the usual care arm receive best practice usual care in the form of  
11 written leaflets containing information about exercises, recovery after surgery, and  
12 treatments for breast cancer. During the pilot phase, different exercise information leaflets  
13 were reviewed and considered; we also consulted best practice guidance for written patient  
14 information materials (12). The most commonly used information leaflets were 'Exercises  
15 after Breast Cancer Surgery (BCC6)' and 'Your Operation and Recovery (BCC151)'  
16 published by Breast Cancer Care (BCC) (13). The BCC leaflets were selected because of  
17 content, style and clarity of presentation of information. These leaflets are given to patients  
18 before surgery by breast care nurses, or other healthcare professionals, depending upon  
19 local practice.  
20  
21  
22  
23  
24  
25  
26  
27  
28  
29  
30  
31

### 32 **Intervention Arm: PROSPER exercise programme**

33  
34 Participants randomised to the active intervention receive usual care leaflets in addition to  
35 the PROSPER intervention: a structured individualised exercise programme, comprising a  
36 minimum of three face-to-face and maximum of six sessions or contacts with a  
37 physiotherapist. A detailed description of intervention development has been submitted for  
38 publication. In brief, the PROSPER programme comprises specific exercises targeting  
39 shoulder range of motion and upper arm muscle strength, general physical activity, and  
40 behavioural adherence strategies. The intervention is predominantly delivered in  
41 physiotherapy outpatient departments.  
42  
43  
44  
45  
46  
47  
48  
49  
50

51  
52 The first physiotherapy session is arranged seven to ten days after surgery, for assessment  
53 of shoulder ROM, pain, function, patients' goals and assessment of confidence to carry out  
54 prescribed exercises. Participants are prescribed an individually tailored home exercise  
55  
56  
57  
58  
59  
60

1  
2  
3 programme and provided with guidance on rehabilitation, management of postoperative  
4 complications and returning to general physical activity and/or work. The second  
5 appointment is between four to six weeks postoperatively to review progress and prescribe  
6 shoulder strengthening exercises. The programme is progressed by increasing exercise  
7 repetitions, sets and resistance. The third appointment is recommended for between 12 to  
8 16 weeks postoperatively, for further progression to facilitate return to work, sport and  
9 hobbies. For women with later entry on the basis of postoperative radiotherapy, these  
10 timings will be slightly delayed, but the exercise programme should commence at the earliest  
11 opportunity, thus within six weeks of surgery.  
12  
13  
14  
15  
16  
17  
18  
19  
20  
21

22 As per development work with patient representatives, and to reflect the pragmatic trial  
23 design, three additional physiotherapy consultations are available on request. The timing  
24 and delivery of additional appointments, either via telephone or face-to-face, are flexible to  
25 account for on-going treatment, physiotherapist judgement and patient preference. Ideally  
26 the intervention will be completed within the first six months following surgery, but women  
27 can contact their physiotherapist for up to 12 months after randomisation. Thus any late  
28 treatment-related shoulder problems will be dealt with by the trial physiotherapist. Number  
29 and method of physiotherapy contacts will be closely monitored during the trial.  
30  
31  
32  
33  
34  
35  
36  
37  
38  
39

## 40 **Outcomes**

41  
42 Figure 1 presents the study outcome measures and standardised assessment scales by  
43 assessment time point. Questionnaires are completed at baseline on recruitment, then at 6  
44 weeks, 6 and 12 months after randomisation by post. The primary outcome is upper limb  
45 function at 12 months measured using the Disabilities of Arm, Shoulder and Hand (DASH)  
46 questionnaire. The DASH is a 30-item patient-reported outcome measure designed to  
47 capture difficulty in performing various upper arm activities (14). A single DASH score is  
48 generated, although psychometric assessment using discriminant content validation analysis  
49 has shown that the scale can be used to produce three health outcome sub-scores for  
50  
51  
52  
53  
54  
55  
56  
57  
58  
59  
60

1  
2  
3 impairment, activity limitation and participation restriction, as per the WHO International  
4 Classification of Functioning Disability and Health (ICF) taxonomy (15). Secondary outcomes  
5 include health-related quality of life, DASH sub-scores, and surgical adverse events  
6 including pain (acute, chronic, neuropathic pain) surgical site infection and lymphoedema.  
7  
8 Data on exercise/mobility are collected to allow comparisons in activity. Healthcare resource  
9 use is recorded for economic analyses.  
10  
11  
12  
13  
14  
15

### 16 **Internal pilot study**

17  
18 A six-month internal pilot phase was conducted at three breast cancer units (Coventry,  
19 Oxford and Wolverhampton) to evaluate processes for patient identification, eligibility and  
20 refinement of recruitment estimates. The intended sample size for the internal pilot study  
21 was 30 participants, approximately 10% of the full sample. Acceptability of the PROSPER  
22 intervention was explored through qualitative research involving audio-recorded individual  
23 interviews with seven participants. Data from the pilot phase helped to refine recruitment and  
24 trial processes. Patients recruited to the pilot phase continue with the follow-up schedule and  
25 will be retained in the full trial analysis.  
26  
27  
28  
29  
30  
31  
32  
33  
34  
35

### 36 **Sample Size**

37  
38 The PROSPER trial aims to recruit 350 patients, allocated in a 1:1 ratio. The sample size  
39 calculation is based on a Dutch trial of thirty women with breast cancer, randomised to  
40 physiotherapy over a three month period, reporting a between group difference of 7 points  
41 on the DASH at 6 months (16). At 80% power and  $p < 0.05$ , this yields a target of 242  
42 participants in total. Accounting for therapist effects, an intraclass coefficient (ICC) of 0.01  
43 (yielding a design effect of 1.05), gives a target of 256 participants. The ICC estimate is  
44 based on our previous experience of exercise interventions in a range of musculoskeletal  
45 trials. We anticipate loss to follow up of less than 10% based on our previous clinical trials  
46 however, have inflated this to 25% to cover the possibility that numbers lost to follow up are  
47 greater than anticipated e.g. due to ongoing cancer treatment.  
48  
49  
50  
51  
52  
53  
54  
55  
56  
57

1  
2  
3  
4  
5 The study is powered to detect a 7 point difference on the DASH. Studies of rheumatological  
6 and orthopaedic populations have suggested that the minimally clinically important  
7 difference (MCID) for the DASH is 10, and that the between group difference for trials should  
8 be set at 10 (17). However, this fails to account for many of the eventualities that occur in  
9 pragmatic trials, notably that there is not a 'no treatment' control arm, and therefore that  
10 some of the control group may be exposed by serendipity to an intervention of similar  
11 intensity, particularly in a high risk population.  
12  
13  
14  
15  
16  
17  
18  
19

### 20 **Data analysis**

21  
22 Statistical analysis will be intention-to-treat and will comply with the CONSORT guidelines.  
23  
24 The primary outcome data will be summarised using mean, standard deviation, median and  
25 range values. The clustering effect will be assessed prior to analysis of the data. In the  
26 presence of a clustering effect, the primary outcome will be analysed using multi-level linear  
27 regression models. If there is negligible clustering effect, it will be analysed using ordinary  
28 linear regression models. In each case, the mean change from baseline (to 6 and 12  
29 months) will be summarised for each of the treatment arms and differences between the  
30 interventions using unadjusted and adjusted (for age, type of surgery and radiotherapy)  
31 estimates. These mean changes and their 95% confidence intervals will be plotted  
32 graphically so that change can be assessed over the course of the study. Continuous  
33 secondary outcomes will be assessed in a similar way to the primary outcome. Categorical  
34 data will be analysed using random effect/ordinary logistic models, depending on the  
35 presence of a clustering effect.  
36  
37  
38  
39  
40  
41  
42  
43  
44  
45  
46  
47  
48  
49

50 A DASH score cannot be computed if there are more than three missing items. As a  
51 sensitivity analysis, the impact of missing data will be assessed using multiple imputation.  
52  
53 The impact of non-compliance with the intervention will be examined using the complier  
54 average causal effect (CACE) analysis (18, 19). We have reviewed definitions of compliance  
55  
56  
57  
58  
59  
60

1  
2  
3 for CACE analyses used in other therapy trials (20, 21). Complete compliance with the  
4 PROSPER intervention is defined as having three or more contacts with the PROSPER  
5 therapist; an additional analysis will be undertaken to explore partial compliance, defined as  
6 less than three sessions. Analyses and template tables will be reported in a detailed  
7 statistical analysis plan for review and approval by the DMC, prior to final statistical analysis  
8 of the data. Planned sensitivity analyses include: a) the impact of low/high recruitment  
9 centres on clustering effect; and b) assessment of differences between date of  
10 randomisation and date of surgery across groups, as surgical trials vary in relation to timing  
11 of follow-up.  
12  
13  
14  
15  
16  
17  
18  
19  
20  
21

### 22 *Economic Evaluation*

23  
24 The primary economic evaluation will be conducted from the NHS and personal social  
25 services (PSS) perspective (22) using the intention-to-treat approach (23). Data will be  
26 collected on the health and social service resources used in the treatment of each trial  
27 participant from randomisation to 12 months post-randomisation. Primary research methods  
28 will be used to estimate the costs of delivering the physiotherapy-led exercise programme,  
29 including development and training of accredited providers, the cost of delivering the  
30 individual sessions and participant monitoring activities. Broader resource utilisation will be  
31 captured through three main sources: (i) clinical data extraction forms; (ii) patient postal  
32 questionnaires at 6 months and 12 months post-randomisation; and if feasible within the trial  
33 timeline, (iii) routine health data sources from NHS Digital. Current UK unit costs, will be  
34 applied to each resource item to estimate costs in each trial arm. Health-related quality of life  
35 will be measured at baseline and at 6 and 12 months post-randomisation using the generic  
36 EuroQol EQ-5D-5L and SF-12 measures; national tariff sets will be used to generate quality-  
37 adjusted life-years (QALYs) (24-28).  
38  
39  
40  
41  
42  
43  
44  
45  
46  
47  
48  
49  
50  
51

52  
53  
54 An incremental cost-effectiveness analysis, expressed in terms of incremental cost per  
55 QALY gained, will be performed. Detailed methods of analysis will be pre-specified within a  
56  
57  
58  
59  
60

1  
2  
3 health economics analysis plan approved by the trial team prior to analysis to ensure  
4 appropriate methods are used. Results will be presented using incremental cost-  
5 effectiveness ratios (ICERs) and cost-effectiveness acceptability curves generated via the  
6 net-benefit framework. A series of sensitivity analyses will be undertaken to explore the  
7 implications of uncertainty on the ICERs and to consider the broader issue of the  
8 generalisability of the study results. Due to the known limitations of within-trial economic  
9 evaluations (29), a decision-analytical model may be constructed to examine the longer term  
10 costs and outcomes beyond the end of the trial. Costs and outcomes beyond the first year  
11 will be discounted to present values (22) and probabilistic sensitivity analyses will be  
12 undertaken to explore the impact of uncertainty on the ICERs.  
13  
14  
15  
16  
17  
18  
19  
20  
21  
22  
23

### 24 **Qualitative sub-study**

25  
26 An embedded qualitative study will be undertaken to gain insight into the experiences of  
27 women participating in trial interventions. We will explore the acceptability of the exercise  
28 programme and compare and contrast experiences with women allocated to the control  
29 intervention.  
30  
31  
32  
33  
34  
35

#### 36 *Design of sub-study*

37  
38 In-depth, semi-structured interviews will be conducted and audio-recorded. Interview topic  
39 guides will be used to ensure similar areas are covered in each interview. Participants  
40 consenting to the main trial are asked to indicate willingness to take part in a future interview  
41 to explore postoperative experiences. A total of twenty interviews are planned, with ten  
42 women from each intervention arm. Purposive sampling will be used, striving for a mix of  
43 geographical location, age, employment status, socio-economic background and ethnicity.  
44  
45  
46  
47  
48  
49  
50

#### 51 *Analysis*

52  
53 Interviews will be recorded, transcribed and analysed using a Framework Approach. A  
54 thematic framework will be developed using pre-determined themes plus new themes raised  
55  
56  
57  
58  
59  
60



1  
2  
3 by participants. The framework will be applied to the interview text and coded data will be  
4 arranged on a chart according to each theme identified. Themes will be examined with a  
5 view to providing explanations of the participants' experiences and understandings.  
6  
7

### 8 **Data security and management**

9  
10 Participant data is stored on a secure database in accordance with the Data Protection Act  
11 (1998). A unique trial identification number is used on all participant communication. Clinical  
12 and patient forms are being checked for completeness and congruity before data entry onto  
13 the PROSPER trial database. Data will undergo additional checks to ensure consistency  
14 between data submitted and original paper forms. Trial documentation and data will be  
15 archived for at least ten years after completion of the trial in accordance with WCTU  
16 standard operating procedures.  
17  
18  
19  
20  
21  
22  
23  
24  
25

### 26 **Trial monitoring**

27  
28 The Trial Management Group (TMG) will oversee all aspects of design, delivery, quality  
29 assurance and data analysis. A Trial Steering Committee (TSC), with independent  
30 Chairperson, will monitor the trial at least once per year. An independent DMC will review  
31 trial progress, recruitment, protocol compliance and interim analysis of outcomes, annually  
32 or more frequently as requested. Recruitment data from the internal pilot study were  
33 reviewed by independent committees and by the funder to approve the launch of the main  
34 trial.  
35  
36  
37  
38  
39  
40  
41  
42  
43

### 44 **Adverse event management**

1  
2  
3 A safety reporting protocol has been developed for related and unexpected serious adverse  
4 events (SAEs) and directly attributable adverse events (AEs). An AE is defined as any  
5 untoward medical occurrence in a subject which does not necessarily have a causal  
6 relationship with the intervention. Any adverse event that occurs whilst undertaking  
7 PROSPER exercises, either during an appointment, or whilst exercising unsupervised at  
8 home, require reporting to the trial team. The trial Chief Investigator, with input from the  
9 WCTU Quality Assurance team, determine whether AEs require reporting to the trial  
10 sponsor, DMC and Ethics Committee, in accordance with the full safety reporting protocol.  
11  
12  
13  
14  
15  
16  
17  
18  
19  
20  
21

### 22 **Research ethics approval**

23  
24 Ethical approval was granted from the NHS National Research Ethics Service (NRES)  
25 Committee West Midlands (Solihull) (15/WM/0224) on 20th July 2015. Site-specific  
26 approvals have been obtained from NHS Research, Development and Innovation  
27 departments.  
28  
29  
30  
31  
32  
33

### 34 **Dissemination policy**

35  
36 The study team are committed to full disclosure of the results of the trial. Findings will be  
37 reported in accordance with CONSORT guidelines (30) and we aim to publish in high impact  
38 journals. Our patient representatives will assist with dissemination of study results through  
39 INVOLVE, other cancer patient groups and organisations including  
40 [www.independentcancerpatientsvoice.org.uk](http://www.independentcancerpatientsvoice.org.uk). The funder will take no role in the analysis or  
41 interpretation of trial results.  
42  
43  
44  
45  
46  
47  
48  
49

### 50 **Discussion**

51  
52 The PROSPER trial will be the largest UK RCT examining the effectiveness of an early,  
53 supervised exercise and behavioural support intervention for women at risk of developing  
54 shoulder problems after breast cancer surgery. Previous trials in this field have been  
55  
56  
57

1  
2  
3 criticised for being of poor methodological quality and lacking in important outcome  
4 measures, such as patient-reported shoulder function and health-related quality of life.  
5 PROSPER will provide empirical data on whether a physiotherapy-led exercise programme  
6 is effective for reducing shoulder disability when delivered in a pragmatic NHS clinical  
7 setting. The design and development of this complex intervention was underpinned by  
8 multiple stages of work, in line with MRC guidance on the development of complex  
9 interventions.  
10  
11  
12  
13  
14  
15

### 16 17 18 **Acknowledgements**

19 We extend very grateful thanks to all the trial participants. We are also grateful to all the  
20 physiotherapy staff, surgical oncology teams, breast cancer nurses and research  
21 departments collaborating on this study.  
22  
23  
24  
25

### 26 27 **Collaborators**

28 PROSPER Study Group: Chief Investigator: Professor Julie Bruce. Co-investigators (Grant  
29 holders): Professor Sarah E Lamb, Dr Esther Williamson, Dr Ranjit Lall, Professor Stavros  
30 Petrou, Mr Alastair M Thompson, Dr John Williams and Dr Catherine Harkin (deceased).  
31  
32

33 Trial Coordination/Administration: Mrs Emma J Withers, Mrs Lauren Betteley, Mr Craig  
34 Turner, Mrs Loraine Chowdhury.  
35  
36

37 Senior Project Managers: Mrs Susie Hennings, Mrs Helen Higgins.  
38

39 Research Fellows/Associates: Dr Helen Richmond, Mrs Clare Lait (Physiotherapist), Dr  
40 Sophie Rees (Qualitative), Mr Pankaj Mistry (Medical Statistics), Dr Alastair Canaway  
41 (Health Economics).  
42  
43  
44

45 Patient representatives: Dr Catherine Harkin (Deceased), Mrs Marie van Laar, Mrs Lyn  
46 Ankcorn.  
47  
48

49 Surgical Leads: Miss Abigail Tomlins, Miss Raghavan Vidya, Ms Pankaj G Roy, Miss Kat  
50 McEvoy.  
51  
52  
53  
54  
55  
56  
57  
58  
59  
60

1  
2  
3 Intervention development: Mrs Clare Lait, Dr Esther Williamson, Dr Cynthia Srikesavan, Mrs  
4 Jane Moser, Dr Meredith Newman, Dr Sophie Rees, Mrs Lauren Betteley, Dr Helen  
5 Richmond, Dr Beth Fordham, Professor Sarah E Lamb and Professor Julie Bruce.

6  
7  
8 Data Programming team: Mr Ade Willis, Mr Henry Adjei.

9  
10 Quality Assurance: Ms Claire Daffern.

11  
12  
13  
14 **Contributors:** JB obtained study funding with support from SEL, EW, RL, SP, AMT and JW.  
15  
16 JB, SEL, EW, CL, RL, AMT, LB, SR and SP participated in the design of the study. EJW and  
17  
18 LB coordinate study administration, acquisition of trial data and administrative support  
19  
20 (CT/LC). PM will undertake statistical analysis, under direction of RL, senior trial statistician.  
21  
22 AC is responsible for health economic analysis, supported by SP, senior health economist.  
23  
24 JB and HR drafted the manuscript. All authors critically revised the manuscript for intellectual  
25  
26 content and approved the final manuscript. This trial protocol is published on behalf of the  
27  
28 PROSPER Study Group.

### 29 30 **Funding**

31  
32 The PROSPER trial is funded by the National Institute of Health Research Technology  
33  
34 Assessment Programme (NiHR HTA), project number 13/84/10. The views expressed in this  
35  
36 publication are those of the authors and not necessarily those of the NIHR or Department of  
37  
38 Health. This project benefited from facilities funded by Birmingham Science City  
39  
40 Translational Medicine Clinical Research and Infrastructure Trials Platform, with support  
41  
42 from Advantage West Midlands (AWM). The trial sponsor is the University of Warwick and  
43  
44 University Hospitals Coventry and Warwickshire NHS Trust.

### 45 46 47 48 **Trial Registration:**

49  
50 International Standard Randomised Controlled Trial Number: ISRCTN 35358984.

### 51 52 53 **Competing interests**

54  
55 One author provides private physiotherapy to cancer patients (CL).

**Data sharing statement**

The trial statisticians and iDMC will have access to the dataset for the analysis of trial outcomes. The CI will have access to the data and take full responsibility for the analysis and publication of results. Once the main analyses have been undertaken, data will be available to other investigators subject to approval of data analysis plans by the steering committee and compliance with the University of Warwick Standard Operating Procedures on Data Management and Sharing. We will comply with Data Sharing Policies that may be instituted by the Funder (NIHR) during the lifetime of the project. The full PROSPER intervention manual and related materials will be available for wider access on completion of the main trial, according to funder and institutional repository requirements.

**Data Monitoring Committee:** Professor Malcolm Reed (Chair), Dr Rhian Gabe, Dr Matthew Maddocks.

**Trial Steering Committee:** Professor Steven Duffy (Chair), Dr Anna Kirby, Dr Karen Robb. We dedicate this article to Professor Adele Frances (Deceased) who served on the PROSPER TSC from 2015-2016.

## References

1. CRUK. *Cancer Research UK: Breast Cancer Survival Statistics* [cited 2014]. Available from: <http://www.cancerresearchuk.org/cancer-info/cancerstats/types/breast/survival/>.
2. Mejdahl MK, Andersen KG, Gärtner R, Kroman N, Kehlet H. Persistent pain and sensory disturbances after treatment for breast cancer: six year nationwide follow-up study. *BMJ*. 2013;346:f1865.
3. McNeely ML, Binkley JM, Pusic AL, Campbell KL, Gabram S, Soballe PW. A prospective model of care for breast cancer rehabilitation: postoperative and postreconstructive issues. *Cancer*. 2012;118(8 Suppl):2226-36.
4. Lee TS, Kilbreath SL, Refshauge KM, Herbert RD, Beith JM. Prognosis of the upper limb following surgery and radiation for breast cancer. *Breast Cancer Res Treat*. 2008;110(1):19-37.
5. Bruce J, Thornton AJ, Powell R, Johnston M, Wells M, Heys SD, et al. Psychological, surgical, and sociodemographic predictors of pain outcomes after breast cancer surgery: a population-based cohort study. *Pain*. 2014;155(2):232-43.
6. Kootstra JJ, Dijkstra PU, Rietman H, de Vries J, Baas P, Geertzen JH, et al. A longitudinal study of shoulder and arm morbidity in breast cancer survivors 7 years after sentinel lymph node biopsy or axillary lymph node dissection. *Breast Cancer Res Treat*. 2013;139(1):125-34.
7. Meretoja TJ, Andersen KG, Bruce J, Haasio L, Sipila R, Scott NW, et al. Clinical Prediction Model and Tool for Assessing Risk of Persistent Pain After Breast Cancer Surgery. *J Clin Oncol*. 2017;35(15):1660-7.
8. DiSipio T, Rye S, Newman B, Hayes S. Incidence of unilateral arm lymphoedema after breast cancer: a systematic review and meta-analysis. *The Lancet Oncology*. 2013;14(6):500-15.

- 1  
2  
3 9. McNeely ML, Campbell K, Ospina M, Rowe BH, Dabbs K, Klassen TP, et al.  
4 Exercise interventions for upper-limb dysfunction due to breast cancer treatment. The  
5 Cochrane database of systematic reviews. 2010(6):CD005211.  
6
- 7  
8 10. Todd J, Scally A, Dodwell D, Horgan K, Topping A. A randomised controlled trial of  
9  
10 two programmes of shoulder exercise following axillary node dissection for invasive breast  
11  
12 cancer. *Physiotherapy*. 2008;94(4):265-73.  
13
- 14 11. Chan A-W, Tetzlaff JM, Gøtzsche PC, Altman DG, Mann H, Berlin JA, et al. SPIRIT  
15  
16 2013 explanation and elaboration: guidance for protocols of clinical trials. *Bmj*.  
17  
18 2013;346:e7586.  
19
- 20 12. Department of Health (DH). Toolkit for producing patient information. London, The  
21  
22 Department of Health; 2003.  
23
- 24 13. BCC. Breast Cancer Campaign [Available from:  
25  
26 <http://www.breastcancercare.org.uk/>.  
27
- 28 14. Harrington S, Michener LA, Kendig T, Miale S, George SZ. Patient-reported upper  
29  
30 extremity outcome measures used in breast cancer survivors: a systematic review. *Archives*  
31  
32 *of physical medicine and rehabilitation*. 2014;95(1):153-62.  
33
- 34 15. Dixon D, Johnston M, McQueen M, Court-Brown C. The Disabilities of the Arm,  
35  
36 Shoulder and Hand Questionnaire (DASH) can measure the impairment, activity limitations  
37  
38 and participation restriction constructs from the International Classification of Functioning,  
39  
40 Disability and Health (ICF). *BMC musculoskeletal disorders*. 2008;9:114.  
41
- 42 16. Beurskens CH, van Uden CJ, Strobbe LJ, Oostendorp RA, Wobbes T. The efficacy  
43  
44 of physiotherapy upon shoulder function following axillary dissection in breast cancer, a  
45  
46 randomized controlled study. *BMC cancer*. 2007;7:166.  
47
- 48 17. Sorensen AA, Howard D, Tan WH, Ketchersid J, Calfee RP. Minimal clinically  
49  
50 important differences of 3 patient-rated outcomes instruments. *The Journal of hand surgery*.  
51  
52 2013;38(4):641-9.  
53  
54  
55  
56  
57  
58  
59  
60

- 1  
2  
3 18. Dunn G, Maracy M, Tomenson B. Estimating treatment effects from randomized  
4 clinical trials with noncompliance and loss to follow-up: the role of instrumental variable  
5 methods. *Statistical methods in medical research*. 2005;14(4):369-95.  
6  
7  
8  
9 19. Perneger TV, Burnand B. A simple imputation algorithm reduced missing data in SF-  
10 12 health surveys. *Journal of clinical epidemiology*. 2005;58(2):142-9.  
11  
12  
13 20. Knox CR, Lall R, Hansen Z, Lamb SE. Treatment compliance and effectiveness of a  
14 cognitive behavioural intervention for low back pain: a complier average causal effect  
15 approach to the BeST data set. *BMC musculoskeletal disorders*. 2014;15:17.  
16  
17  
18 21. Williams MA, Williamson EM, Heine PJ, Nichols V, Glover MJ, Dritsaki M, et al.  
19 Strengthening And stretching for Rheumatoid Arthritis of the Hand (SARAH). A randomised  
20 controlled trial and economic evaluation. *Health Technol Assess*. 2015;19(19):1-222.  
21  
22  
23 22. NICE. *Guide to the Methods of Technology Appraisal 2013* [Available from:  
24 <http://publications.nice.org.uk/guide-to-the-methods-of-technology-appraisal-2013-pmg9>.  
25  
26  
27  
28 23. Hollis S, Campbell F. What is meant by intention to treat analysis? Survey of  
29 published randomised controlled trials. *Bmj*. 1999;319(7211):670-4.  
30  
31  
32 24. Dolan P. Modeling valuations for EuroQol health states. *Medical care*.  
33 1997;35(11):1095-108.  
34  
35  
36 25. van Hout B, Janssen MF, Feng YS, Kohlmann T, Busschbach J, Golicki D, et al.  
37 Interim scoring for the EQ-5D-5L: mapping the EQ-5D-5L to EQ-5D-3L value sets. *Value in*  
38 *health : the journal of the International Society for Pharmacoeconomics and Outcomes*  
39 *Research*. 2012;15(5):708-15.  
40  
41  
42  
43 26. Herdman M, Gudex C, Lloyd A, Janssen M, Kind P, Parkin D, et al. Development and  
44 preliminary testing of the new five-level version of EQ-5D (EQ-5D-5L). *Quality of life*  
45 *research : an international journal of quality of life aspects of treatment, care and*  
46 *rehabilitation*. 2011;20(10):1727-36.  
47  
48  
49  
50  
51 27. Brazier J, Roberts J, Deverill M. The estimation of a preference-based measure of  
52 health from the SF-36. *Journal of health economics*. 2002;21(2):271-92.  
53  
54  
55  
56  
57  
58  
59  
60



- 1  
2  
3 28. Devlin N, Shah K, Feng Y, Mulhern B, van Hout B. Valuing health-related quality of  
4 life: an EQ-5D-5L value set for England. 2016.  
5  
6 29. Sculpher MJ, Claxton K, Drummond M, McCabe C. Whither trial-based economic  
7 evaluation for health care decision making? Health economics. 2006;15(7):677-87.  
8  
9 30. Moher D, Schulz KF, Altman DG. The CONSORT statement: revised  
10 recommendations for improving the quality of reports of parallel-group randomised trials.  
11 Lancet. 2001;357(9263):1191-4.  
12  
13  
14  
15  
16  
17  
18  
19  
20  
21  
22  
23  
24  
25  
26  
27  
28  
29  
30  
31  
32  
33  
34  
35  
36  
37  
38  
39  
40  
41  
42  
43  
44  
45  
46  
47  
48  
49  
50  
51  
52  
53  
54  
55  
56  
57  
58  
59  
60

**Table 1 World Health Organisation Trial Registration Data Set**

| <b>Data category</b>                          | <b>Information</b>                                                                                                                                                                                                        |
|-----------------------------------------------|---------------------------------------------------------------------------------------------------------------------------------------------------------------------------------------------------------------------------|
| Primary registry and trial identifying number | ISRCTN35358984                                                                                                                                                                                                            |
| Date of registration in primary registry      | Project Number 13/84/10                                                                                                                                                                                                   |
| Secondary identifying numbers                 | HTA                                                                                                                                                                                                                       |
| Source of monetary or material support        | National Institute for Health Research (NIHR) Health Technology Assessment (HTA)                                                                                                                                          |
| Joint sponsor                                 | University of Warwick / University Hospitals Coventry & Warwickshire NHS Trust                                                                                                                                            |
| Contact for public queries                    | <a href="mailto:prosper@warwick.ac.uk">prosper@warwick.ac.uk</a>                                                                                                                                                          |
| Contact for scientific queries                | Prof Julie Bruce, Warwick Clinical Trials Unit, University of Warwick                                                                                                                                                     |
| Public Title                                  | Exercise to prevent shoulder problems in patients undergoing breast cancer treatment                                                                                                                                      |
| Scientific Title                              | The PRevention Of Shoulder ProbleMs Study (PROSPER): a randomised controlled clinical trial comparing physiotherapy-led exercise versus usual care in women at high risk of shoulder problems after breast cancer surgery |
| Countries of recruitment                      | UK                                                                                                                                                                                                                        |
| Health condition or problem studied           | Breast cancer                                                                                                                                                                                                             |
| Interventions                                 | Advice only: Breast Cancer Care leaflets<br>Comparator: Physiotherapy-led structured exercise programme incorporating behavioural                                                                                         |

1  
2  
3  
4  
5  
6  
7  
8  
9  
10  
11  
12  
13  
14  
15  
16  
17  
18  
19  
20  
21  
22  
23  
24  
25  
26  
27  
28  
29  
30  
31  
32  
33  
34  
35  
36  
37  
38  
39  
40  
41  
42  
43  
44  
45  
46  
47

|                                      |                                                                                                                                                                                                                                                                                                                                           |
|--------------------------------------|-------------------------------------------------------------------------------------------------------------------------------------------------------------------------------------------------------------------------------------------------------------------------------------------------------------------------------------------|
|                                      | strategies                                                                                                                                                                                                                                                                                                                                |
| Key inclusion and exclusion criteria | Age: 18 years or over, no upper age restriction<br><br>Sex: Female<br><br>Inclusion: confirmed invasive/non-invasive primary breast cancer schedule for surgical excision, at high risk of shoulder problems as defined by criteria given in Table 2.<br><br>Exclusion: males, and women with exclusion criteria as described in Table 2. |
| Study type                           | Interventional<br><br>Allocation: randomised; individual assignment.<br><br>Primary purpose: prevention.<br><br>Phase III                                                                                                                                                                                                                 |
| Date of first enrolment              | January 2016                                                                                                                                                                                                                                                                                                                              |
| Target sample size                   | 350                                                                                                                                                                                                                                                                                                                                       |
| Recruitment status                   | Recruiting to July 2017                                                                                                                                                                                                                                                                                                                   |
| Primary outcome                      | Arm, shoulder and hand function as measured using the Disabilities of the Arm, Shoulder and Hand (DASH) questionnaire at 12 months                                                                                                                                                                                                        |
| Key secondary outcomes               | DASH subscales, pain (acute, chronic, neuropathic), health-related quality of life, surgical site infection, lymphoedema and other complications, health care resource use.                                                                                                                                                               |

1  
2  
3  
4  
5  
6  
7  
8  
9  
10  
11  
12  
13  
14  
15  
16  
17  
18  
19  
20  
21  
22  
23  
24  
25  
26  
27  
28  
29  
30  
31  
32  
33  
34  
35  
36  
37  
38  
39  
40  
41  
42  
43  
44  
45  
46  
47

|  |                                                              |
|--|--------------------------------------------------------------|
|  | Exercise/activity data to inform adherence to interventions. |
|--|--------------------------------------------------------------|

For peer review only

**Table 2. Trial inclusion and exclusion criteria**

| Inclusion Criteria                                                                                                                                                                                                                                                                                                                                  | Exclusion Criteria                                                                                                          |
|-----------------------------------------------------------------------------------------------------------------------------------------------------------------------------------------------------------------------------------------------------------------------------------------------------------------------------------------------------|-----------------------------------------------------------------------------------------------------------------------------|
| Aged ≥18 years old                                                                                                                                                                                                                                                                                                                                  | Males                                                                                                                       |
| Histologically confirmed invasive or non-invasive primary breast cancer scheduled for surgical excision of breast cancer                                                                                                                                                                                                                            | Women having immediate reconstructive surgery                                                                               |
| Considered high risk of developing shoulder problems after surgery defined by one or more of the following: <ul style="list-style-type: none"> <li>• Planned axillary node clearance</li> <li>• Planned radiotherapy to the axilla and/or supraclavicular*</li> <li>• Existing shoulder problems (based upon PROSPER screening criteria)</li> </ul> | Women having sentinel lymph node biopsy (SLNB), with or without breast surgery, unless they fulfil other high risk criteria |
| Obesity defined as BMI >30                                                                                                                                                                                                                                                                                                                          | Women having bilateral breast surgery                                                                                       |
| Any subsequent axillary surgery related to primary surgery e.g. ANC conducted after sentinel lymph node biopsy (SLNB)                                                                                                                                                                                                                               | Evidence of metastatic disease at time of recruitment                                                                       |
| Able to provide written informed consent                                                                                                                                                                                                                                                                                                            |                                                                                                                             |
| Willing and able to comply with the protocol                                                                                                                                                                                                                                                                                                        |                                                                                                                             |
| <i>*includes women informed of need for radiotherapy to the axilla and/or supraclavicular within six weeks of surgery, thus potential late entry to the trial is allowed in this setting</i>                                                                                                                                                        |                                                                                                                             |

Figure 1. Study outcome measures and assessment time points

| Time point                                                                                                                                                                                                                                                     | Study period                |                   |                  |                   |                    |
|----------------------------------------------------------------------------------------------------------------------------------------------------------------------------------------------------------------------------------------------------------------|-----------------------------|-------------------|------------------|-------------------|--------------------|
|                                                                                                                                                                                                                                                                | Enrolment                   | Allocation        | Post-allocation  |                   |                    |
|                                                                                                                                                                                                                                                                | $-t_1$                      | $0$               | $t_1$<br>6 weeks | $t_2$<br>6 months | $t_3$<br>12 months |
| Enrolment:                                                                                                                                                                                                                                                     |                             |                   |                  |                   |                    |
| Eligibility screen                                                                                                                                                                                                                                             | √                           |                   |                  |                   |                    |
| Informed consent                                                                                                                                                                                                                                               | √                           |                   |                  |                   |                    |
| Randomisation                                                                                                                                                                                                                                                  | 350                         | √                 |                  |                   |                    |
| Interventions                                                                                                                                                                                                                                                  |                             |                   |                  |                   |                    |
| Usual Care (UC)                                                                                                                                                                                                                                                | 175                         | All participants  | ←→               |                   |                    |
| UC + PROSPER intervention                                                                                                                                                                                                                                      | 175                         |                   | ←→               |                   |                    |
| Assessments:                                                                                                                                                                                                                                                   |                             |                   |                  |                   |                    |
| Baseline                                                                                                                                                                                                                                                       | √                           |                   |                  |                   |                    |
| Primary outcome                                                                                                                                                                                                                                                | Function                    | DASH              |                  |                   | √                  |
| Secondary outcomes                                                                                                                                                                                                                                             | Function                    | DASH subscales    | -                | √                 | √                  |
|                                                                                                                                                                                                                                                                | Acute & chronic pain        | FACT-B+4; NRS     | √                | √                 | √                  |
|                                                                                                                                                                                                                                                                | Neuropathic pain            | DN4               | √                | √                 | √                  |
|                                                                                                                                                                                                                                                                | Complications               | SSI + self-report | √                | √                 | √                  |
|                                                                                                                                                                                                                                                                | Lymphoedema                 | Self-report       | √                | √                 | √                  |
|                                                                                                                                                                                                                                                                | Health-related QoL          | SF12 / EQ-5D-5L   | -                | √                 | √                  |
|                                                                                                                                                                                                                                                                | Resource use                | Self-report       | -                | √                 | √                  |
|                                                                                                                                                                                                                                                                | General activity & exercise | PASE items        | √                | √                 | √                  |
| <p><i>DASH: Disabilities of Arm, Shoulder and Hand questionnaire; DN4: Doleur Neuropathique; SF12: Short Form-12; SSI: surgical site infection; EQ-5D-5L: Euroqol; t: time point; QoL: Quality of Life; PASE: Physical Activity Scale for the Elderly.</i></p> |                             |                   |                  |                   |                    |

**Figure 2. Trial flow diagram**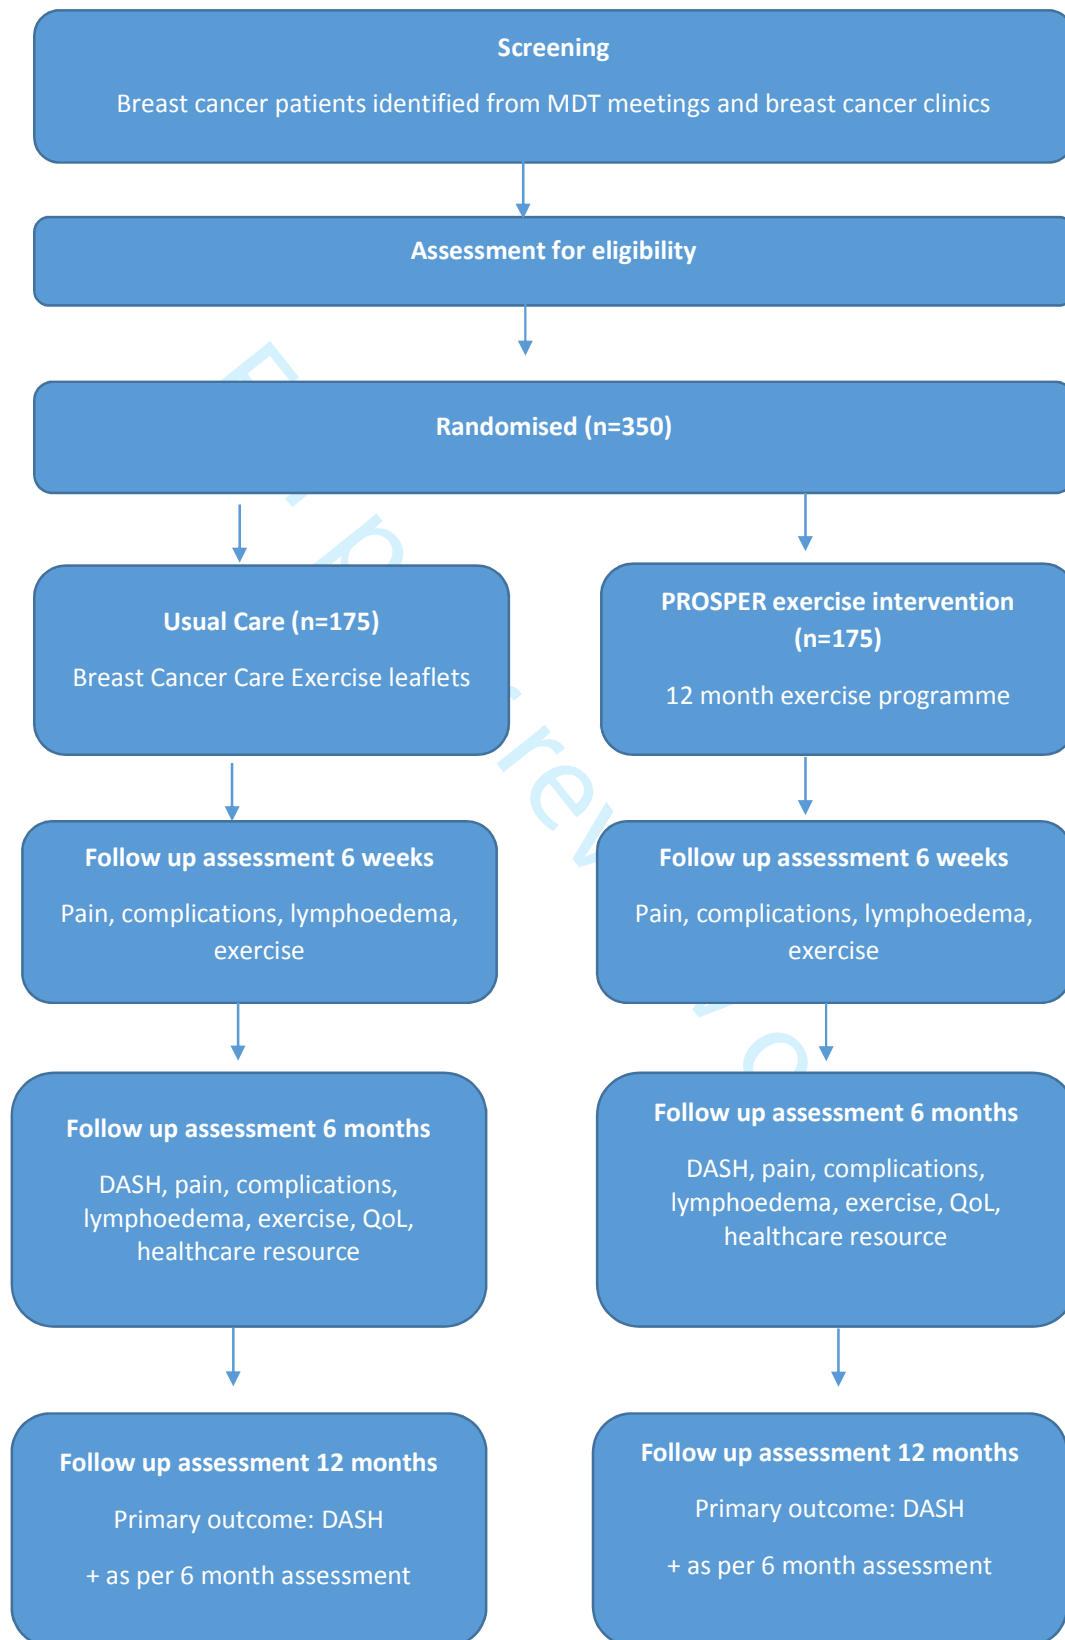

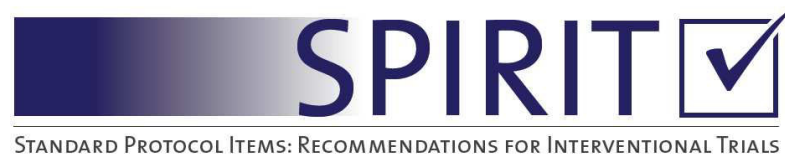

SPIRIT 2013 Checklist: Recommended items to address in a clinical trial protocol and related documents\*

| Section/item                      | Item No | Description                                                                                                                                                                                                                                                                              | Addressed on page number |
|-----------------------------------|---------|------------------------------------------------------------------------------------------------------------------------------------------------------------------------------------------------------------------------------------------------------------------------------------------|--------------------------|
| <b>Administrative information</b> |         |                                                                                                                                                                                                                                                                                          |                          |
| Title                             | 1       | Descriptive title identifying the study design, population, interventions, and, if applicable, trial acronym                                                                                                                                                                             | 1                        |
| Trial registration                | 2a      | Trial identifier and registry name. If not yet registered, name of intended registry                                                                                                                                                                                                     | 4                        |
|                                   | 2b      | All items from the World Health Organization Trial Registration Data Set                                                                                                                                                                                                                 | Table 1                  |
| Protocol version                  | 3       | Date and version identifier                                                                                                                                                                                                                                                              | 3 & 22                   |
| Funding                           | 4       | Sources and types of financial, material, and other support                                                                                                                                                                                                                              | 25 & Table 1             |
| Roles and responsibilities        | 5a      | Names, affiliations, and roles of protocol contributors                                                                                                                                                                                                                                  | 24-25                    |
|                                   | 5b      | Name and contact information for the trial sponsor                                                                                                                                                                                                                                       | Table 1                  |
|                                   | 5c      | Role of study sponsor and funders, if any, in study design; collection, management, analysis, and interpretation of data; writing of the report; and the decision to submit the report for publication, including whether they will have ultimate authority over any of these activities | 25-6                     |
|                                   | 5d      | Composition, roles, and responsibilities of the coordinating centre, steering committee, endpoint adjudication committee, data management team, and other individuals or groups overseeing the trial, if applicable (see Item 21a for data monitoring committee)                         | 24                       |



1  
2  
3  
4  
5  
6  
7  
8  
9  
10  
11  
12  
13  
14  
15  
16  
17  
18  
19  
20  
21  
22  
23  
24  
25  
26  
27  
28  
29  
30  
31  
32  
33  
34  
35  
36  
37  
38  
39  
40  
41  
42  
43  
44  
45  
46  
47

**Introduction**

|                          |    |                                                                                                                                                                                                           |         |
|--------------------------|----|-----------------------------------------------------------------------------------------------------------------------------------------------------------------------------------------------------------|---------|
| Background and rationale | 6a | Description of research question and justification for undertaking the trial, including summary of relevant studies (published and unpublished) examining benefits and harms for each intervention        | 5 - 7   |
|                          | 6b | Explanation for choice of comparators                                                                                                                                                                     | 10 – 12 |
| Objectives               | 7  | Specific objectives or hypotheses                                                                                                                                                                         | 8       |
| Trial design             | 8  | Description of trial design including type of trial (eg, parallel group, crossover, factorial, single group), allocation ratio, and framework (eg, superiority, equivalence, noninferiority, exploratory) | 8 - 9   |

**Methods: Participants, interventions, and outcomes**

|                      |     |                                                                                                                                                                                                                                                                                                                                                                                |                                      |
|----------------------|-----|--------------------------------------------------------------------------------------------------------------------------------------------------------------------------------------------------------------------------------------------------------------------------------------------------------------------------------------------------------------------------------|--------------------------------------|
| Study setting        | 9   | Description of study settings (eg, community clinic, academic hospital) and list of countries where data will be collected. Reference to where list of study sites can be obtained                                                                                                                                                                                             | 8                                    |
| Eligibility criteria | 10  | Inclusion and exclusion criteria for participants. If applicable, eligibility criteria for study centres and individuals who will perform the interventions (eg, surgeons, psychotherapists)                                                                                                                                                                                   | 8 – 9                                |
| Interventions        | 11a | Interventions for each group with sufficient detail to allow replication, including how and when they will be administered                                                                                                                                                                                                                                                     | 10-12 + separate intervention papers |
|                      | 11b | Criteria for discontinuing or modifying allocated interventions for a given trial participant (eg, drug dose change in response to harms, participant request, or improving/worsening disease)                                                                                                                                                                                 | 22                                   |
|                      | 11c | Strategies to improve adherence to intervention protocols, and any procedures for monitoring adherence (eg, drug tablet return, laboratory tests)                                                                                                                                                                                                                              | 12                                   |
|                      | 11d | Relevant concomitant care and interventions that are permitted or prohibited during the trial                                                                                                                                                                                                                                                                                  | 12                                   |
| Outcomes             | 12  | Primary, secondary, and other outcomes, including the specific measurement variable (eg, systolic blood pressure), analysis metric (eg, change from baseline, final value, time to event), method of aggregation (eg, median, proportion), and time point for each outcome. Explanation of the clinical relevance of chosen efficacy and harm outcomes is strongly recommended | Table 2                              |
| Participant timeline | 13  | Time schedule of enrolment, interventions (including any run-ins and washouts), assessments, and visits for participants. A schematic diagram is highly recommended (see Figure)                                                                                                                                                                                               | Figure 1                             |

1  
2  
3 Sample size 14 Estimated number of participants needed to achieve study objectives and how it was determined, including 16  
4 clinical and statistical assumptions supporting any sample size calculations

5  
6 Recruitment 15 Strategies for achieving adequate participant enrolment to reach target sample size 9  
7

8 **Methods: Assignment of interventions (for controlled trials)**  
9

10 Allocation:

11 Sequence generation 16a Method of generating the allocation sequence (eg, computer-generated random numbers), and list of any 9  
12 factors for stratification. To reduce predictability of a random sequence, details of any planned restriction  
13 (eg, blocking) should be provided in a separate document that is unavailable to those who enrol participants  
14 or assign interventions  
15  
16

17 Allocation concealment mechanism 16b Mechanism of implementing the allocation sequence (eg, central telephone; sequentially numbered, 9  
18 opaque, sealed envelopes), describing any steps to conceal the sequence until interventions are assigned  
19  
20

21 Implementation 16c Who will generate the allocation sequence, who will enrol participants, and who will assign participants to 10  
22 interventions  
23

24 Blinding (masking) 17a Who will be blinded after assignment to interventions (eg, trial participants, care providers, outcome 10  
25 assessors, data analysts), and how  
26

27 17b If blinded, circumstances under which unblinding is permissible, and procedure for revealing a participant's 10  
28 allocated intervention during the trial  
29  
30

31 **Methods: Data collection, management, and analysis**  
32

33 Data collection methods 18a Plans for assessment and collection of outcome, baseline, and other trial data, including any related 11 & Table 2  
34 processes to promote data quality (eg, duplicate measurements, training of assessors) and a description of  
35 study instruments (eg, questionnaires, laboratory tests) along with their reliability and validity, if known.  
36 Reference to where data collection forms can be found, if not in the protocol  
37

38 18b Plans to promote participant retention and complete follow-up, including list of any outcome data to be 11 & 14  
39 collected for participants who discontinue or deviate from intervention protocols  
40  
41  
42  
43  
44

1  
2  
3  
4  
5  
6  
7  
8  
9  
10  
11  
12  
13  
14  
15  
16  
17  
18  
19  
20  
21  
22  
23  
24  
25  
26  
27  
28  
29  
30  
31  
32  
33  
34  
35  
36  
37  
38  
39  
40  
41  
42  
43  
44  
45  
46  
47

|                                 |     |                                                                                                                                                                                                                                                                                                                                       |                                       |
|---------------------------------|-----|---------------------------------------------------------------------------------------------------------------------------------------------------------------------------------------------------------------------------------------------------------------------------------------------------------------------------------------|---------------------------------------|
| Data management                 | 19  | Plans for data entry, coding, security, and storage, including any related processes to promote data quality (eg, double data entry; range checks for data values). Reference to where details of data management procedures can be found, if not in the protocol                                                                     | 20                                    |
| Statistical methods             | 20a | Statistical methods for analysing primary and secondary outcomes. Reference to where other details of the statistical analysis plan can be found, if not in the protocol                                                                                                                                                              | 17-20                                 |
|                                 | 20b | Methods for any additional analyses (eg, subgroup and adjusted analyses)                                                                                                                                                                                                                                                              | 17-20                                 |
|                                 | 20c | Definition of analysis population relating to protocol non-adherence (eg, as randomised analysis), and any statistical methods to handle missing data (eg, multiple imputation)                                                                                                                                                       | 18-20                                 |
| <b>Methods: Monitoring</b>      |     |                                                                                                                                                                                                                                                                                                                                       |                                       |
| Data monitoring                 | 21a | Composition of data monitoring committee (DMC); summary of its role and reporting structure; statement of whether it is independent from the sponsor and competing interests; and reference to where further details about its charter can be found, if not in the protocol. Alternatively, an explanation of why a DMC is not needed | 22                                    |
|                                 | 21b | Description of any interim analyses and stopping guidelines, including who will have access to these interim results and make the final decision to terminate the trial                                                                                                                                                               | 20                                    |
| Harms                           | 22  | Plans for collecting, assessing, reporting, and managing solicited and spontaneously reported adverse events and other unintended effects of trial interventions or trial conduct                                                                                                                                                     | 22                                    |
| Auditing                        | 23  | Frequency and procedures for auditing trial conduct, if any, and whether the process will be independent from investigators and the sponsor                                                                                                                                                                                           | 12 & described in intervention papers |
| <b>Ethics and dissemination</b> |     |                                                                                                                                                                                                                                                                                                                                       |                                       |
| Research ethics approval        | 24  | Plans for seeking research ethics committee/institutional review board (REC/IRB) approval                                                                                                                                                                                                                                             | 22                                    |
| Protocol amendments             | 25  | Plans for communicating important protocol modifications (eg, changes to eligibility criteria, outcomes, analyses) to relevant parties (eg, investigators, REC/IRBs, trial participants, trial registries, journals, regulators)                                                                                                      | 4                                     |

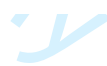

|    |                               |     |                                                                                                                                                                                                                                                                                     |                                          |
|----|-------------------------------|-----|-------------------------------------------------------------------------------------------------------------------------------------------------------------------------------------------------------------------------------------------------------------------------------------|------------------------------------------|
| 1  |                               |     |                                                                                                                                                                                                                                                                                     |                                          |
| 2  |                               |     |                                                                                                                                                                                                                                                                                     |                                          |
| 3  | Consent or assent             | 26a | Who will obtain informed consent or assent from potential trial participants or authorised surrogates, and how (see Item 32)                                                                                                                                                        | 9                                        |
| 4  |                               |     |                                                                                                                                                                                                                                                                                     |                                          |
| 5  |                               |     |                                                                                                                                                                                                                                                                                     |                                          |
| 6  |                               | 26b | Additional consent provisions for collection and use of participant data and biological specimens in ancillary studies, if applicable                                                                                                                                               | 9 & 21                                   |
| 7  |                               |     |                                                                                                                                                                                                                                                                                     |                                          |
| 8  | Confidentiality               | 27  | How personal information about potential and enrolled participants will be collected, shared, and maintained in order to protect confidentiality before, during, and after the trial                                                                                                | 9                                        |
| 9  |                               |     |                                                                                                                                                                                                                                                                                     |                                          |
| 10 |                               |     |                                                                                                                                                                                                                                                                                     |                                          |
| 11 | Declaration of interests      | 28  | Financial and other competing interests for principal investigators for the overall trial and each study site                                                                                                                                                                       | 24                                       |
| 12 |                               |     |                                                                                                                                                                                                                                                                                     |                                          |
| 13 |                               |     |                                                                                                                                                                                                                                                                                     |                                          |
| 14 | Access to data                | 29  | Statement of who will have access to the final trial dataset, and disclosure of contractual agreements that limit such access for investigators                                                                                                                                     | 26                                       |
| 15 |                               |     |                                                                                                                                                                                                                                                                                     |                                          |
| 16 |                               |     |                                                                                                                                                                                                                                                                                     |                                          |
| 17 | Ancillary and post-trial care | 30  | Provisions, if any, for ancillary and post-trial care, and for compensation to those who suffer harm from trial participation                                                                                                                                                       | 12                                       |
| 18 |                               |     |                                                                                                                                                                                                                                                                                     |                                          |
| 19 |                               |     |                                                                                                                                                                                                                                                                                     |                                          |
| 20 | Dissemination policy          | 31a | Plans for investigators and sponsor to communicate trial results to participants, healthcare professionals, the public, and other relevant groups (eg, via publication, reporting in results databases, or other data sharing arrangements), including any publication restrictions | 3-4 & 20                                 |
| 21 |                               |     |                                                                                                                                                                                                                                                                                     |                                          |
| 22 |                               |     |                                                                                                                                                                                                                                                                                     |                                          |
| 23 |                               |     |                                                                                                                                                                                                                                                                                     |                                          |
| 24 |                               |     |                                                                                                                                                                                                                                                                                     |                                          |
| 25 |                               | 31b | Authorship eligibility guidelines and any intended use of professional writers                                                                                                                                                                                                      | 3                                        |
| 26 |                               |     |                                                                                                                                                                                                                                                                                     |                                          |
| 27 |                               | 31c | Plans, if any, for granting public access to the full protocol, participant-level dataset, and statistical code                                                                                                                                                                     | 24                                       |
| 28 |                               |     |                                                                                                                                                                                                                                                                                     |                                          |
| 29 | <b>Appendices</b>             |     |                                                                                                                                                                                                                                                                                     |                                          |
| 30 |                               |     |                                                                                                                                                                                                                                                                                     |                                          |
| 31 | Informed consent materials    | 32  | Model consent form and other related documentation given to participants and authorised surrogates                                                                                                                                                                                  | Can be provided as Appendix if requested |
| 32 |                               |     |                                                                                                                                                                                                                                                                                     |                                          |
| 33 |                               |     |                                                                                                                                                                                                                                                                                     |                                          |
| 34 |                               |     |                                                                                                                                                                                                                                                                                     |                                          |
| 35 | Biological specimens          | 33  | Plans for collection, laboratory evaluation, and storage of biological specimens for genetic or molecular analysis in the current trial and for future use in ancillary studies, if applicable                                                                                      | Not applicable                           |
| 36 |                               |     |                                                                                                                                                                                                                                                                                     |                                          |
| 37 |                               |     |                                                                                                                                                                                                                                                                                     |                                          |

\*It is strongly recommended that this checklist be read in conjunction with the SPIRIT 2013 Explanation & Elaboration for important clarification on the items. Amendments to the protocol should be tracked and dated. The SPIRIT checklist is copyrighted by the SPIRIT Group under the Creative Commons "[Attribution-NonCommercial-NoDerivs 3.0 Unported](https://creativecommons.org/licenses/by-nc-nd/3.0/)" license.

# BMJ Open

## A randomised controlled trial of exercise to prevent shoulder problems in women undergoing breast cancer treatment: study protocol for the Prevention of Shoulder Problems Trial (UK PROSPER Trial)

|                                 |                                                                                                                                                                                                                                                                                                                                                                                                                                                                                                                                                                                                                                                                                                                                                                                                                                                                                                                                                                                                                                                                          |
|---------------------------------|--------------------------------------------------------------------------------------------------------------------------------------------------------------------------------------------------------------------------------------------------------------------------------------------------------------------------------------------------------------------------------------------------------------------------------------------------------------------------------------------------------------------------------------------------------------------------------------------------------------------------------------------------------------------------------------------------------------------------------------------------------------------------------------------------------------------------------------------------------------------------------------------------------------------------------------------------------------------------------------------------------------------------------------------------------------------------|
| Journal:                        | <i>BMJ Open</i>                                                                                                                                                                                                                                                                                                                                                                                                                                                                                                                                                                                                                                                                                                                                                                                                                                                                                                                                                                                                                                                          |
| Manuscript ID                   | bmjopen-2017-019078.R1                                                                                                                                                                                                                                                                                                                                                                                                                                                                                                                                                                                                                                                                                                                                                                                                                                                                                                                                                                                                                                                   |
| Article Type:                   | Protocol                                                                                                                                                                                                                                                                                                                                                                                                                                                                                                                                                                                                                                                                                                                                                                                                                                                                                                                                                                                                                                                                 |
| Date Submitted by the Author:   | 01-Nov-2017                                                                                                                                                                                                                                                                                                                                                                                                                                                                                                                                                                                                                                                                                                                                                                                                                                                                                                                                                                                                                                                              |
| Complete List of Authors:       | Bruce, Julie; University of Warwick, Warwick Clinical Trials Unit<br>Williamson, Esther; Nuffield Department of Orthopaedics, Rheumatology and Musculoskeletal Sciences, University of Oxford, United Kingdom. , Centre for Rehabilitation Research in Oxford<br>Lait, Clare; Gloucestershire Care Services NHS Trust<br>Richmond, Helen ; University of Warwick, Warwick Clinical Trials Unit<br>Betteley, Lauren; University of Warwick Warwick Medical School, Warwick Clinical Trials Unit<br>Lall, Ranjit; University of Warwick, Warwick Clinical Trials Unit<br>Petrou, Stavros; University of Warwick, Warwick Medical School<br>Rees, Sophie; University of Warwick, Warwick Clinical Trials Unit<br>Withers, Emma; University of Warwick, Warwick Clinical Trials Unit<br>Lamb, Sarah; University of Oxford, Nuffield Department of Orthopaedics, Rheumatology and Musculoskeletal Sciences<br>Thompson, Alastair; University of Texas M.D. Anderson Cancer Center, Department of Breast Surgical Oncology and Department of Translational Molecular Pathology |
| <b>Primary Subject Heading</b>: | Rehabilitation medicine                                                                                                                                                                                                                                                                                                                                                                                                                                                                                                                                                                                                                                                                                                                                                                                                                                                                                                                                                                                                                                                  |
| Secondary Subject Heading:      | Surgery, Health services research, Oncology                                                                                                                                                                                                                                                                                                                                                                                                                                                                                                                                                                                                                                                                                                                                                                                                                                                                                                                                                                                                                              |
| Keywords:                       | Breast surgery < SURGERY, Clinical trials < THERAPEUTICS, Rehabilitation medicine < INTERNAL MEDICINE                                                                                                                                                                                                                                                                                                                                                                                                                                                                                                                                                                                                                                                                                                                                                                                                                                                                                                                                                                    |
|                                 |                                                                                                                                                                                                                                                                                                                                                                                                                                                                                                                                                                                                                                                                                                                                                                                                                                                                                                                                                                                                                                                                          |

SCHOLARONE™  
Manuscripts

1  
2  
3 **A randomised controlled trial of exercise to prevent shoulder problems in women**  
4 **undergoing breast cancer treatment: study protocol for the Prevention of Shoulder**  
5 **Problems Trial (UK PROSPER Trial)**  
6  
7

8  
9  
10 **Authors:** Julie Bruce<sup>1</sup>, Esther Williamson<sup>2</sup>, Clare Lait<sup>3</sup>, Helen Richmond<sup>1</sup>, Lauren Betteley<sup>1</sup>,  
11 Ranjit Lall<sup>1</sup>, Stavros Petrou<sup>1</sup>, Sophie Rees<sup>1</sup>, Emma J Withers<sup>1</sup>, Sarah E Lamb<sup>1,2</sup> and Alastair  
12 Thompson<sup>4</sup> on behalf of the PROSPER Study Group.  
13  
14  
15

16  
17  
18 **Author affiliations**  
19

- 20  
21 1. Warwick Clinical Trials Unit, Division of Health Sciences, University of Warwick,  
22 Coventry CV4 7AL, UK  
23  
24 2. Nuffield Department of Orthopaedics Rheumatology & Musculoskeletal Sciences,  
25 University of Oxford, Windmill Road, Oxford, OX3 7LD, UK  
26  
27 3. Gloucestershire Care Services NHS Trust, 1010 Gloucester Business Park, Pioneer  
28 Avenue, Brockworth, Gloucester, GL3 4AW, UK  
29  
30 4. Department of Breast Surgical Oncology & Department of Translational Molecular  
31 Pathology, University of Texas M.D. Anderson Cancer Center, 1400 Pressler Drive,  
32 Houston, Texas, US  
33  
34  
35  
36  
37  
38

39 **Corresponding author:** Professor Julie Bruce; [julie.bruce@warwick.ac.uk](mailto:julie.bruce@warwick.ac.uk)  
40  
41  
42  
43  
44  
45  
46  
47  
48  
49  
50  
51  
52  
53  
54  
55  
56  
57  
58  
59  
60

## Abstract

Musculoskeletal shoulder problems are common after breast cancer treatment. Early postoperative exercises targeting the upper limb may improve shoulder function. This protocol describes a National Institute for Health Research (NIHR) funded randomised controlled trial (RCT) to evaluate the clinical and cost-effectiveness of an early supervised structured exercise programme compared to usual care, for women at high risk of developing shoulder problems after breast cancer surgery.

## Methods

This pragmatic two-armed, multicentre RCT is underway within secondary care in the United Kingdom (UK). PROSPER aims to recruit 350 women from approximately 15 UK centres with follow-up at 6 weeks, 6 and 12 months after randomisation. Recruitment processes and intervention development were optimised through qualitative research during a six-month internal pilot phase. Participants are randomised to the PROSPER intervention or best practice usual care only. The PROSPER intervention is delivered by physiotherapists and incorporates three main components: shoulder-specific exercises targeting range of movement and strength; general physical activity; and behavioural strategies to encourage adherence and support exercise behaviour. The primary outcome is upper arm function assessed using the Disabilities of the Arm Shoulder and Hand (DASH) questionnaire at 12 months post-randomisation. Secondary outcomes include DASH subscales, acute and chronic pain, complications, health related quality of life, and healthcare resource use. We will interview a subsample of twenty participants to explore their experiences of the trial interventions.

## Discussion

The PROSPER study is the first multicentre UK clinical trial to investigate the clinical and cost-effectiveness of supported exercise in the prevention of shoulder problems in high risk women undergoing breast cancer surgery. The findings will inform future clinical practice and provide valuable insight into the role of physiotherapy-supported exercise in breast cancer rehabilitation.

1  
2  
3 **Trial registration:** ISRCTN35358984

4 **Protocol version:** Version 2.1; dated 11/01/2017

5  
6 **Funding:** NIHR HTA (Project Number 13/84/10)

7  
8  
9  
10 **Strengths and limitations of this study**

11  
12 **Strengths:**

- 13  
14
- 15 • A large pragmatic study delivering a complex intervention to prevent postoperative health
  - 16 problems in newly diagnosed cancer patients within secondary care;
  - 17
  - 18 • A strength of the evaluation is the mixed methods approach incorporating embedded
  - 19 qualitative research and economic analysis
  - 20
  - 21

22  
23 **Limitations:**

- 24
- 25 • Recruited participants undergo multiple cancer treatments thus experience a
  - 26 complicated postoperative recovery pathway.
  - 27
  - 28
  - 29
  - 30
  - 31
  - 32
  - 33
  - 34
  - 35
  - 36
  - 37
  - 38
  - 39
  - 40
  - 41
  - 42
  - 43
  - 44
  - 45
  - 46
  - 47
  - 48
  - 49
  - 50
  - 51
  - 52
  - 53
  - 54
  - 55
  - 56
  - 57
  - 58
  - 59
  - 60



## Background

Breast cancer is the most common cancer in women in the UK with a 30% increase in incidence since the early 1970s (1). Due to advances in screening and treatment, the survival rate has progressively risen and now two thirds of women will survive for 20 years beyond their breast cancer diagnosis (1). The mainstay treatment is surgery to the breast and axilla, supplemented with chemotherapy, radiotherapy and endocrine therapy, depending upon tumour stage and other clinical criteria. As a consequence of these treatments, upper limb problems such as decreased shoulder range of movement (ROM), impaired strength, chronic pain, sensory disturbances and lymphoedema are common adverse treatment effects (2, 3). Studies suggest that up to 67% of women have arm or shoulder symptoms up to 3 years after treatment (4). Persistent upper limb dysfunction and pain are debilitating, have a negative impact upon sleep, quality of life, physical functioning and emotional wellbeing. Given successes in increasing survival, it is timely to identify strategies to improve the health-related quality of life of women after breast cancer treatment.

Several risk factors for shoulder and upper body problems after breast cancer treatment have been identified, including treatment-related factors, such as type of axillary surgery and radiotherapy (RT), and patient factors such as age, body mass index (BMI), and pre-existing shoulder problems (4, 5). Women undergoing mastectomy compared to breast conserving surgery are at greater risk of postoperative shoulder restrictions (odds ratio (OR) 5.7, 95% confidence interval (CI) 1.03, 31.2) (4). Additionally, those undergoing axillary lymph node clearance (ANC) are at greater risk of postoperative arm complaints compared to those having sentinel lymph node biopsy (SLNB; OR 9.8; 95% CI 3.5, 27.5) (4-6). Radiotherapy (RT), particularly to the axilla or chest wall, increases the odds of shoulder restriction (pooled OR 1.7, 95% CI 1.0, 2.9) and lymphoedema (pooled OR 1.5, 95% CI 1.2, 1.8) compared to women treated without adjuvant RT (4). Women reporting problems in the upper body and shoulder region before surgery are also at increased risk of chronic postoperative pain (5, 7).

1  
2  
3 BMI at time of surgery has been shown to have an independent negative effect on shoulder  
4 external rotation up to seven years after breast cancer treatment, and increased BMI is a risk  
5 factor for chronic postoperative pain and arm lymphoedema (7, 8). It is important that the UK  
6 National Health Service (NHS) provides optimal care for these women at high risk of  
7 developing shoulder problems to ensure recovery and return to usual activities after cancer  
8 treatment.  
9  
10  
11  
12  
13  
14  
15

16  
17 A Cochrane review identified 24 studies (2132 participants) investigating exercise following  
18 breast cancer surgery (9). Six studies (n=354), conducted outside of the UK, found that  
19 structured postoperative exercise significantly improved shoulder ROM in the short and long  
20 term when compared to usual care (9). Ten studies (n=1304) have evaluated timing of  
21 exercise delivery; programmes initiated immediately postoperatively (1-3 days) versus  
22 delayed exercise suggest that early postoperative exercise does significantly improve long-  
23 term shoulder ROM. However, some studies reported an increased risk of wound-related  
24 complications with early exercise, such as seroma and surgical site infection (9). The largest  
25 UK trial to date (n=116 patients), published after the Cochrane review, found that  
26 participants were less likely to develop lymphoedema when exercises were limited to 90° of  
27 shoulder elevation during the first postoperative week compared to those performing  
28 unrestricted exercises (10). These previous trials investigating the efficacy of exercise  
29 following breast cancer surgery have been criticised for being of poor methodological quality  
30 and for omitting important patient-reported outcomes such as function and health-related  
31 quality of life (9). Furthermore, there is ongoing uncertainty around the optimal type, dose,  
32 and timing of exercise after breast cancer treatment. Moreover, none of the trials conducted  
33 to date have investigated the cost-effectiveness of structured exercise programmes after  
34 breast cancer treatment.  
35  
36  
37  
38  
39  
40  
41  
42  
43  
44  
45  
46  
47  
48  
49  
50  
51  
52  
53  
54  
55  
56  
57  
58  
59  
60

## Rationale for a trial

To date, no large scale, high-quality, multicentre RCT investigating the clinical effectiveness of a structured physiotherapy intervention compared to usual care for women undergoing breast cancer surgery has been conducted. Given the lack of knowledge regarding the intensity and duration of exercise interventions after breast cancer surgery, this trial will provide evidence on whether a rigorously designed physiotherapy-led intervention, incorporating behaviour change theory, improves postoperative function and related outcomes, and whether this is cost-effective to deliver in the NHS setting.

## Methods

### Aim

The overall aim of PROSPER is to investigate the clinical and cost-effectiveness of an early supervised exercise programme compared to best practice usual care for women at high risk of shoulder problems after treatment for breast cancer, on outcomes of upper arm function, complications and quality of life. Specific trial objectives are:

1. To develop and refine a complex intervention of physiotherapy-led exercise for women at risk of developing musculoskeletal problems after breast cancer treatment;
2. To assess the acceptability of the structured exercise programme and outcome measures, optimise participant recruitment and refine trial processes during a six-month internal pilot phase at three clinical centres;
3. Use findings from the internal pilot phase to undertake a definitive full RCT in approximately 15 UK NHS breast cancer centres.

This protocol follows guidance from the Standard Protocol Items: Recommendations for Interventional Trials (SPIRIT)(11). Core trial information is presented in Table 1 (WHO Trial Registration Data Set). Figure 1 details the schedule of enrolment, interventions and assessment.

### **Trial design and setting**

A multicentre, pragmatic, parallel, two-arm RCT with an internal pilot study and embedded economic evaluation and qualitative studies. The trial framework is superiority rather than equivalence or exploratory. The trial is currently open and recruiting from 17 NHS tertiary breast cancer centres across England. Participants are randomised in a 1:1 ratio between intervention and control arms.

### **Patient and public involvement (PPI) in trial design**

Four female PPI representatives, all of whom were treated for breast cancer, were consulted during the initial grant preparation, intervention development and trial set up. Our PPI representatives contributed to the design of the intervention and advised on recruitment-related issues; they provided valuable insight into the worries and concerns experienced during cancer treatment.

### **Eligibility Criteria**

Women are eligible to participate in PROSPER if they are: diagnosed with histologically confirmed invasive or non-invasive primary breast cancer scheduled for surgical excision; aged 18 years or over; can comply with the protocol; willing to provide written informed consent; and considered as being at high risk of developing postoperative shoulder problems (Table 2). This is a pragmatic trial and it is important that inclusion criteria reflect contemporary clinical practice. Therefore, women are also eligible where a later decision is made for postoperative radiotherapy (RT) to the axilla and/or supraclavicular region, thus changing their risk status from low to high. 'Late entry' women are eligible for the trial if the decision for postoperative RT is made within six weeks of surgery. Women who have had previous breast surgery (such as excision of a benign tumour or breast cyst) and those women who have had previous contralateral (opposite side) mastectomy, are eligible for invitation providing they fulfil high risk criteria for shoulder problems. Women having

1  
2  
3 immediate reconstruction or bilateral breast surgery are ineligible as the usual NHS  
4 postoperative care pathway often includes routine postoperative physiotherapy. Exclusion  
5 criteria are presented in Table 2.  
6  
7  
8  
9

### 10 **Participant screening, recruitment and consent**

11  
12 Participants are screened and identified from multi-disciplinary team (MDT) meetings and  
13 preoperative breast/oncology clinic lists in secondary care. The initial screening process is  
14 undertaken by a member of the clinical team, research nurse or trained designee. Potentially  
15 eligible patients are approached by clinical or research staff and are given a Patient  
16 Information Sheet (PIS) with further explanation of the trial. Figure 2 summarises participant  
17 flow.  
18  
19  
20  
21  
22  
23  
24  
25

### 26 **Allocation sequence generation and randomisation**

27  
28 Randomisation is based upon a computer-generated algorithm held and controlled centrally  
29 by the Warwick Clinical Trials Unit (WCTU) programming team, independent from the  
30 PROSPER trial team. The WCTU telephone randomisation service is used whereby  
31 randomisation occurs after eligibility and informed consent has been obtained. Concealment  
32 of allocation is maintained. An automated confirmation email of intervention allocation is  
33 generated to the study team. Randomisation is stratified by the following variables: (i) first  
34 versus repeat surgery; (ii) centre; and (iii) whether informed of the need for radiotherapy  
35 within six weeks of surgery. The first variable adjusts for the requirement for any additional  
36 surgery which may change risk status from low to high (e.g. second procedure ANC or  
37 reexcision of surgical margins). The second stratification variable ensures balanced  
38 allocation across each recruitment site. The third variable accounts for late entry to the trial,  
39 thus relates to the timing of intervention delivery and whether participants are randomised  
40 preoperatively (up to the day of surgery) or within the first six weeks postoperatively. Due to  
41 the nature of the study intervention, it is not possible to blind participants or treating  
42 physiotherapists to treatment allocation. However, receipt and handling of outcome data  
43  
44  
45  
46  
47  
48  
49  
50  
51  
52  
53  
54  
55  
56  
57  
58  
59  
60

1  
2  
3 collection is blinded, thus data entry of returned postal questionnaires, data cleaning and  
4 interim statistical analyses are conducted without knowledge of treatment allocation  
5 (blinded).  
6  
7  
8  
9

## 10 **Interventions**

### 11 **Control Arm: Usual Care**

12  
13 All participants allocated to the usual care arm receive best practice usual care in the form of  
14 written leaflets containing information about exercises, recovery after surgery, and  
15 treatments for breast cancer. During the pilot phase, different exercise information leaflets  
16 were reviewed and considered; we also consulted best practice guidance for written patient  
17 information materials (12). The most commonly used information leaflets were 'Exercises  
18 after Breast Cancer Surgery (BCC6)' and 'Your Operation and Recovery (BCC151)'  
19 published by Breast Cancer Care (BCC) (13). The BCC leaflets were selected because of  
20 content, style and clarity of presentation of information. These two information leaflets were  
21 given to all patients before surgery by breast care nurses, or other healthcare professionals,  
22 depending upon local practice.  
23  
24  
25  
26  
27  
28  
29  
30  
31  
32  
33  
34  
35

### 36 **Intervention Arm: PROSPER exercise programme**

37  
38 Participants randomised to the active intervention receive usual care leaflets in addition to  
39 the PROSPER intervention: a structured individualised exercise programme, comprising a  
40 minimum of three face-to-face and maximum of six sessions or contacts with a  
41 physiotherapist. A more detailed description of intervention development and final content  
42 has been submitted for publication. In brief, the PROSPER programme comprises specific  
43 exercises targeting shoulder range of motion and upper arm muscle strength, general  
44 physical activity, and behavioural adherence strategies. The intervention is predominantly  
45 delivered in physiotherapy outpatient departments.  
46  
47  
48  
49  
50  
51  
52  
53  
54  
55  
56  
57  
58  
59  
60

1  
2  
3 The first physiotherapy session is arranged seven to ten days after surgery, for assessment  
4 of shoulder ROM, postoperative pain, function, arm swelling, patients' goals and assessment  
5 of confidence to carry out prescribed exercises. Participants are prescribed an individually  
6 tailored home exercise programme and provided with guidance on rehabilitation,  
7 management of postoperative complications and returning to general physical activity and/or  
8 work. The second appointment is between four to six weeks postoperatively to review  
9 progress and prescribe shoulder strengthening exercises. The programme is progressed by  
10 increasing exercise repetitions, sets and resistance. The third appointment is recommended  
11 for between 12 to 16 weeks postoperatively, for further progression to facilitate return to  
12 work, sport and hobbies. For women with later entry on the basis of postoperative  
13 radiotherapy, these timings will be slightly delayed, but the exercise programme should  
14 commence at the earliest opportunity, thus within six weeks of surgery.  
15  
16  
17  
18  
19  
20  
21  
22  
23  
24  
25  
26  
27

28 As per development work with patient representatives, and to reflect the pragmatic trial  
29 design, three additional physiotherapy consultations are available on request. The timing  
30 and delivery of additional appointments, either via telephone or face-to-face, are flexible to  
31 account for on-going treatment, physiotherapist judgement and patient preference. Ideally  
32 the intervention will be completed within the first six months following surgery, but women  
33 can contact their physiotherapist for up to 12 months after randomisation. Thus any late  
34 treatment-related shoulder problems will be dealt with by the trial physiotherapist. Number  
35 and method of physiotherapy contacts will be closely monitored during the trial.  
36  
37  
38  
39  
40  
41  
42  
43  
44  
45

## 46 **Outcomes**

47  
48 Figure 1 and Table 3 present the study outcome measures and standardised assessment  
49 scales by assessment time point. Questionnaires are completed at baseline on recruitment,  
50 then at 6 weeks, 6 and 12 months after randomisation by post. The **primary outcome** is  
51 upper limb function at 12 months measured using the Disabilities of Arm, Shoulder and Hand  
52 (DASH) questionnaire. We considered other patient-reported outcome measures, including  
53  
54  
55  
56  
57

1  
2  
3 shoulder-specific scales, however selected the DASH because it captures symptoms and  
4 function of the upper limb rather than the shoulder joint *per se*. There is good evidence to  
5 suggest that women experience a variety of difficulties and restrictions after breast cancer  
6 treatment, affecting the hand, arm and shoulder. Functional impairment to the arm can affect  
7 performance of simple daily activities, including writing, opening or closing jars, lifting and/or  
8 holding shopping bags.  
9  
10  
11  
12  
13  
14  
15

16  
17 The DASH is a 30-item patient-reported outcome measure designed to capture difficulty in  
18 performing various upper arm activities (14). A single DASH score is generated, although  
19 psychometric assessment using discriminant content validation analysis has shown that the  
20 scale can be used to produce three health outcome sub-scores for impairment, activity  
21 limitation and participation restriction, as per the WHO International Classification of  
22 Functioning Disability and Health (ICF) taxonomy (15).  
23  
24  
25  
26  
27  
28  
29

30 **Secondary outcomes** include health-related quality of life (EuroQol EQ-5D-5L and Short-  
31 Form-12), DASH sub-scores, and surgical adverse events including pain (acute, chronic,  
32 neuropathic pain) surgical site infection and lymphoedema. A numerical rating scale (NRS)  
33 0-10 and Doleur Neuropathique Questionnaire (DN4) are used to collect pain intensity and  
34 pain character. The Functional Assessment of Cancer Therapy-Breast (FACT-B4) subscale  
35 captures arm tenderness, numbness, painful movement and stiffness. We added items to  
36 capture arm heaviness and swelling as self-report indicators of lymphoedema.  
37  
38  
39  
40  
41  
42  
43

44 Data on exercise/mobility are collected to allow comparisons in physical activity (selected  
45 items from the Physical Activity Scale for the Elderly (PASE)). Healthcare resource use is  
46 recorded for economic analyses.  
47  
48  
49  
50  
51

## 52 **Sample Size**

53  
54 The PROSPER trial aims to recruit 350 patients, allocated in a 1:1 ratio. The sample size  
55 calculation is based on a Dutch trial of thirty women with breast cancer, randomised to  
56  
57  
58  
59  
60



1  
2  
3 physiotherapy over a three month period, reporting a between group difference of 7 points  
4 on the DASH at 6 months (16). At 80% power and  $p < 0.05$ , this yields a target of 242  
5 participants in total. Accounting for therapist effects, an intraclass coefficient (ICC) of 0.01  
6 (yielding a design effect of 1.05), gives a target of 256 participants. The ICC estimate is  
7 based on our previous experience of exercise interventions in a range of musculoskeletal  
8 trials. We anticipate loss to follow up of less than 10% based on our previous clinical trials  
9 however, have inflated this to 25% to cover the possibility that numbers lost to follow up are  
10 greater than anticipated e.g. due to ongoing cancer treatment.  
11  
12  
13  
14  
15  
16  
17  
18  
19

20 The study is powered to detect a 7 point difference on the DASH. Studies of rheumatological  
21 and orthopaedic populations have suggested that the minimally clinically important  
22 difference (MCID) for the DASH is 10, and that the between group difference for trials should  
23 be set at 10 (17). However, this fails to account for many of the eventualities that occur in  
24 pragmatic trials, notably that there is not a 'no treatment' control arm, and therefore that  
25 some of the control group may be exposed by serendipity to an intervention of similar  
26 intensity, particularly in a high risk population.  
27  
28  
29  
30  
31  
32  
33  
34  
35

### 36 **Internal pilot study**

37  
38 A six-month internal pilot phase was conducted at three breast cancer units (Coventry,  
39 Oxford and Wolverhampton) to evaluate processes for patient identification, eligibility and  
40 refinement of recruitment estimates. The intended sample size for the internal pilot study  
41 was 30 participants, approximately 10% of the full sample. Acceptability of the PROSPER  
42 intervention was explored through qualitative research involving audio-recorded individual  
43 interviews with seven participants. Changes were made to patient-facing materials and to  
44 exercise intervention materials. Easy to use pocket-sized laminated cards with details of  
45 inclusion/exclusion criteria and shoulder screening criteria were produced for recruitment  
46 staff. Additional telephone or face-to-face appointments were added to the exercise  
47 intervention to allow for flexibility during ongoing cancer treatment. Data from the pilot phase  
48  
49  
50  
51  
52  
53  
54  
55  
56  
57  
58  
59  
60

1  
2  
3 helped to refine recruitment and trial processes. Patients recruited to the pilot phase  
4 continue with the follow-up schedule and will be retained in the full trial analysis. The pilot  
5 study was completed as planned and the funder approved progression to full trial.  
6  
7  
8  
9

## 10 **Data analysis**

11  
12 Statistical analysis will be intention-to-treat and will comply with the CONSORT guidelines.  
13  
14 The primary outcome data will be summarised using mean, standard deviation, median and  
15 range values. The clustering effect will be assessed prior to analysis of the data. In the  
16 presence of a clustering effect, the primary outcome will be analysed using multi-level linear  
17 regression models. If there is negligible clustering effect, it will be analysed using ordinary  
18 linear regression models. In each case, the mean change from baseline (to 6 and 12  
19 months) will be summarised for each of the treatment arms and differences between the  
20 interventions using unadjusted and adjusted (for age, type of surgery and radiotherapy)  
21 estimates. These mean changes and their 95% confidence intervals will be plotted  
22 graphically so that change can be assessed over the course of the study. Continuous  
23 secondary outcomes will be assessed in a similar way to the primary outcome. Categorical  
24 data will be analysed using random effect/ordinary logistic models, depending on the  
25 presence of a clustering effect.  
26  
27  
28  
29  
30  
31  
32  
33  
34  
35  
36  
37  
38  
39

40 A DASH score cannot be computed if there are more than three missing items. As a  
41 sensitivity analysis, the impact of missing data will be assessed using multiple imputation.  
42  
43 The impact of non-compliance with the intervention will be examined using the complier  
44 average causal effect (CACE) analysis (18, 19). We have reviewed definitions of compliance  
45 for CACE analyses used in other therapy trials (20, 21). Complete compliance with the  
46 PROSPER intervention is defined as having three or more contacts with the PROSPER  
47 therapist; an additional analysis will be undertaken to explore partial compliance, defined as  
48 less than three sessions. Analyses and template tables will be reported in a detailed  
49 statistical analysis plan for review and approval by the DMC, prior to final statistical analysis  
50  
51  
52  
53  
54  
55  
56  
57  
58  
59  
60

1  
2  
3 of the data. Planned sensitivity analyses include: a) the impact of low/high recruitment  
4 centres on clustering effect; and b) assessment of differences between date of  
5 randomisation and date of surgery across groups, as surgical trials vary in relation to timing  
6 of follow-up.  
7  
8  
9

### 10 11 12 *Economic Evaluation* 13

14 The primary economic evaluation will be conducted from the NHS and personal social  
15 services (PSS) perspective (22) using the intention-to-treat approach (23). Data will be  
16 collected on the health and social service resources used in the treatment of each trial  
17 participant from randomisation to 12 months post-randomisation. Primary research methods  
18 will be used to estimate the costs of delivering the physiotherapy-led exercise programme,  
19 including development and training of accredited providers, the cost of delivering the  
20 individual sessions and participant monitoring activities. Broader resource utilisation will be  
21 captured through three main sources: (i) clinical data extraction forms; (ii) patient postal  
22 questionnaires at 6 months and 12 months post-randomisation; and if feasible within the trial  
23 timeline, (iii) routine health data sources from NHS Digital. Current UK unit costs, will be  
24 applied to each resource item to estimate costs in each trial arm. Health-related quality of life  
25 will be measured at baseline and at 6 and 12 months post-randomisation using the generic  
26 EQ-5D-5L and SF-12 measures; national tariff sets will be used to generate quality-adjusted  
27 life-years (QALYs) (24-28).  
28  
29  
30  
31  
32  
33  
34  
35  
36  
37  
38  
39  
40  
41  
42  
43

44 An incremental cost-effectiveness analysis, expressed in terms of incremental cost per  
45 QALY gained, will be performed. Detailed methods of analysis will be pre-specified within a  
46 health economics analysis plan approved by the trial team prior to analysis to ensure  
47 appropriate methods are used. Results will be presented using incremental cost-  
48 effectiveness ratios (ICERs) and cost-effectiveness acceptability curves generated via the  
49 net-benefit framework. A series of sensitivity analyses will be undertaken to explore the  
50 implications of uncertainty on the ICERs and to consider the broader issue of the  
51  
52  
53  
54  
55  
56  
57  
58  
59  
60

1  
2  
3 generalisability of the study results. Due to the known limitations of within-trial economic  
4 evaluations (29), a decision-analytical model may be constructed to examine the longer term  
5 costs and outcomes beyond the end of the trial. Costs and outcomes beyond the first year  
6 will be discounted to present values (22) and probabilistic sensitivity analyses will be  
7 undertaken to explore the impact of uncertainty on the ICERs.  
8  
9  
10  
11  
12  
13

### 14 **Qualitative sub-study**

15  
16 An embedded qualitative study will be undertaken to gain insight into the experiences of  
17 women participating in trial interventions. We will explore the acceptability of the exercise  
18 programme and compare and contrast experiences with women allocated to the control  
19 intervention.  
20  
21  
22  
23  
24  
25

#### 26 *Design of sub-study*

27  
28 In-depth, semi-structured interviews will be conducted and audio-recorded. Interview topic  
29 guides will be used to ensure similar areas are covered in each interview. Participants  
30 consenting to the main trial are asked to indicate willingness to take part in a future interview  
31 to explore postoperative experiences. A total of twenty interviews are planned, with ten  
32 women from each intervention arm. Purposive sampling will be used, striving for a mix of  
33 geographical location, age, employment status, socio-economic background and ethnicity.  
34  
35  
36  
37  
38  
39  
40  
41

#### 42 *Analysis*

43  
44 Interviews will be recorded, transcribed and analysed using a Framework Approach. A  
45 thematic framework will be developed using pre-determined themes plus new themes raised  
46 by participants. The framework will be applied to the interview text and coded data will be  
47 arranged on a chart according to each theme identified. Themes will be examined with a  
48 view to providing explanations of the participants' experiences and understandings.  
49  
50  
51  
52  
53  
54  
55  
56  
57  
58  
59  
60

### **Data security and management**

Participant data is stored on a secure database in accordance with the Data Protection Act (1998). A unique trial identification number is used on all participant communication. Clinical and patient forms are being checked for completeness and congruity before data entry onto the PROSPER trial database. Data will undergo additional checks to ensure consistency between data submitted and original paper forms. Trial documentation and data will be archived for at least ten years after completion of the trial in accordance with WCTU standard operating procedures.

### **Trial monitoring**

The Trial Management Group (TMG) will oversee all aspects of design, delivery, quality assurance and data analysis. A Trial Steering Committee (TSC), with independent Chairperson, will monitor the trial at least once per year. An independent DMC will review trial progress, recruitment, protocol compliance and interim analysis of outcomes, annually or more frequently as requested. Recruitment data from the internal pilot study were reviewed by independent committees and by the funder to approve the launch of the main trial.

### **Adverse event management**

A safety reporting protocol has been developed for related and unexpected serious adverse events (SAEs) and directly attributable adverse events (AEs). An AE is defined as any untoward medical occurrence in a subject which does not necessarily have a causal relationship with the intervention. Any adverse event that occurs whilst undertaking PROSPER exercises, either during an appointment, or whilst exercising unsupervised at home, require reporting to the trial team. The trial Chief Investigator, with input from the WCTU Quality Assurance team, determine whether AEs require reporting to the trial sponsor, DMC and Ethics Committee, in accordance with the full safety reporting protocol.

### Research ethics approval

Ethical approval was granted from the NHS National Research Ethics Service (NRES) Committee West Midlands (Solihull) (15/WM/0224) on 20th July 2015. Site-specific approvals have been obtained from NHS Research, Development and Innovation departments.

### Dissemination policy

The study team are committed to full disclosure of the results of the trial. Findings will be reported in accordance with CONSORT guidelines (30) and we aim to publish in high impact journals. Our patient representatives will assist with dissemination of study results through INVOLVE, other cancer patient groups and organisations including [www.independentcancerpatientsvoice.org.uk](http://www.independentcancerpatientsvoice.org.uk). The funder will take no role in the analysis or interpretation of trial results.

### Discussion

The PROSPER trial will be the largest UK RCT examining the effectiveness of an early, supervised exercise and behavioural support intervention for women at risk of developing shoulder problems after breast cancer surgery. Previous trials in this field have been criticised for being of poor methodological quality and lacking in important outcome measures, such as patient-reported shoulder function and health-related quality of life. PROSPER will provide empirical data on whether a physiotherapy-led exercise programme is effective for reducing shoulder disability when delivered in a pragmatic NHS clinical setting. The design and development of this complex intervention was underpinned by multiple stages of work, in line with MRC guidance on the development of complex interventions. A full description of the PROSPER exercise intervention has been submitted elsewhere for publication.

## Acknowledgements

We extend very grateful thanks to all the trial participants. We are also grateful to all the physiotherapy staff, surgical oncology teams, breast cancer nurses and research departments collaborating on this study.

## Collaborators

PROSPER Study Group: Chief Investigator: Professor Julie Bruce. Co-investigators (Grant holders): Professor Sarah E Lamb, Dr Esther Williamson, Dr Ranjit Lall, Professor Stavros Petrou, Mr Alastair M Thompson, Dr John Williams and Dr Catherine Harkin (deceased).

Trial Coordination/Administration: Mrs Emma J Withers, Mrs Lauren Betteley, Mr Craig Turner, Mrs Loraine Chowdhury.

Senior Project Managers: Mrs Susie Hennings, Mrs Helen Higgins.

Research Fellows/Associates: Dr Helen Richmond, Mrs Clare Lait (Physiotherapist), Dr Sophie Rees (Qualitative), Mr Pankaj Mistry (Medical Statistics), Dr Alastair Canaway (Health Economics).

Patient representatives: Dr Catherine Harkin (Deceased), Mrs Marie van Laar, Mrs Lyn Ankcorn.

Surgical Leads: Miss Abigail Tomlins, Miss Raghavan Vidya, Ms Pankaj G Roy, Miss Kat McEvoy, Miss Rachel Soulsby.

Intervention development: Mrs Clare Lait, Dr Esther Williamson, Dr Cynthia Srikesavan, Mrs Jane Moser, Dr Meredith Newman, Dr Sophie Rees, Mrs Lauren Betteley, Dr Helen Richmond, Dr Beth Fordham, Professor Sarah E Lamb and Professor Julie Bruce.

Data Programming team: Mr Ade Willis, Mr Henry Adjei.

Quality Assurance: Ms Claire Daffern.

**Contributors:** JB obtained study funding with support from SEL, EW, RL, SP and AMT. JB, SEL, EW, CL, RL, AMT, LB, SR and SP participated in the design of the study. EJW and LB coordinate study administration, acquisition of trial data and administrative support (CT/LC). PM will undertake statistical analysis, under direction of RL, senior trial statistician. AC is

1  
2  
3 responsible for health economic analysis, supported by SP, senior health economist. JB and  
4 HR drafted the manuscript. All authors critically revised the manuscript for intellectual  
5 content and approved the final manuscript. This trial protocol is published on behalf of the  
6 PROSPER Study Group.  
7  
8  
9

### 10 **Funding**

11  
12 The PROSPER trial is funded by the National Institute of Health Research Technology  
13 Assessment Programme (NIHR HTA), project number 13/84/10. The views expressed in this  
14 publication are those of the authors and not necessarily those of the NIHR or Department of  
15 Health. This project benefited from facilities funded by Birmingham Science City  
16 Translational Medicine Clinical Research and Infrastructure Trials Platform, with support  
17 from Advantage West Midlands (AWM). The trial sponsor is the University of Warwick and  
18 University Hospitals Coventry and Warwickshire NHS Trust.  
19  
20  
21  
22  
23  
24  
25  
26  
27

### 28 **Trial Registration:**

29  
30 International Standard Randomised Controlled Trial Number: ISRCTN 35358984.  
31  
32

### 33 **Competing interests**

34  
35 One author provides private physiotherapy to cancer patients (CL).  
36  
37  
38

### 39 **Data sharing statement**

40  
41 The trial statisticians and iDMC will have access to the dataset for the analysis of trial  
42 outcomes. The CI will have access to the data and take full responsibility for the analysis  
43 and publication of results. Once the main analyses have been undertaken, data will be  
44 available to other investigators subject to approval of data analysis plans by the steering  
45 committee and compliance with the University of Warwick Standard Operating Procedures  
46 on Data Management and Sharing. We will comply with Data Sharing Policies that may be  
47 instituted by the Funder (NIHR) during the lifetime of the project. The full PROSPER  
48  
49  
50  
51  
52  
53  
54  
55  
56  
57  
58  
59  
60



1  
2  
3 intervention manual and related materials will be available for wider access on completion of  
4 the main trial, according to funder and institutional repository requirements.  
5  
6  
7  
8  
9  
10

11  
12 **Data Monitoring Committee:** Professor Malcolm Reed (Chair), Dr Rhian Gabe, Dr  
13 Matthew Maddocks.  
14

15 **Trial Steering Committee:** Professor Steven Duffy (Chair), Dr Anna Kirby, Dr Karen Robb.  
16

17 We dedicate this article to Professor Adele Frances (Deceased) who served on the  
18 PROSPER TSC from 2015-2016.  
19  
20  
21  
22  
23  
24  
25  
26  
27  
28  
29  
30  
31  
32  
33  
34  
35  
36  
37  
38  
39  
40  
41  
42  
43  
44  
45  
46  
47  
48  
49  
50  
51  
52  
53  
54  
55  
56  
57  
58  
59  
60

## References

1. CRUK. *Cancer Research UK: Breast Cancer Survival Statistics* [cited 2014]. Available from: <http://www.cancerresearchuk.org/cancer-info/cancerstats/types/breast/survival/>.
2. Mejdahl MK, Andersen KG, Gärtner R, Kroman N, Kehlet H. Persistent pain and sensory disturbances after treatment for breast cancer: six year nationwide follow-up study. *BMJ*. 2013;346:f1865.
3. McNeely ML, Binkley JM, Pusic AL, Campbell KL, Gabram S, Soballe PW. A prospective model of care for breast cancer rehabilitation: postoperative and postreconstructive issues. *Cancer*. 2012;118(8 Suppl):2226-36.
4. Lee TS, Kilbreath SL, Refshauge KM, Herbert RD, Beith JM. Prognosis of the upper limb following surgery and radiation for breast cancer. *Breast Cancer Res Treat*. 2008;110(1):19-37.
5. Bruce J, Thornton AJ, Powell R, Johnston M, Wells M, Heys SD, et al. Psychological, surgical, and sociodemographic predictors of pain outcomes after breast cancer surgery: a population-based cohort study. *Pain*. 2014;155(2):232-43.
6. Kootstra JJ, Dijkstra PU, Rietman H, de Vries J, Baas P, Geertzen JH, et al. A longitudinal study of shoulder and arm morbidity in breast cancer survivors 7 years after sentinel lymph node biopsy or axillary lymph node dissection. *Breast Cancer Res Treat*. 2013;139(1):125-34.
7. Meretoja TJ, Andersen KG, Bruce J, Haasio L, Sipila R, Scott NW, et al. Clinical Prediction Model and Tool for Assessing Risk of Persistent Pain After Breast Cancer Surgery. *J Clin Oncol*. 2017;35(15):1660-7.
8. DiSipio T, Rye S, Newman B, Hayes S. Incidence of unilateral arm lymphoedema after breast cancer: a systematic review and meta-analysis. *The Lancet Oncology*. 2013;14(6):500-15.

- 1  
2  
3 9. McNeely ML, Campbell K, Ospina M, Rowe BH, Dabbs K, Klassen TP, et al.  
4 Exercise interventions for upper-limb dysfunction due to breast cancer treatment. The  
5 Cochrane database of systematic reviews. 2010(6):CD005211.  
6
- 7  
8 10. Todd J, Scally A, Dodwell D, Horgan K, Topping A. A randomised controlled trial of  
9  
10 two programmes of shoulder exercise following axillary node dissection for invasive breast  
11  
12 cancer. *Physiotherapy*. 2008;94(4):265-73.  
13
- 14 11. Chan A-W, Tetzlaff JM, Gøtzsche PC, Altman DG, Mann H, Berlin JA, et al. SPIRIT  
15  
16 2013 explanation and elaboration: guidance for protocols of clinical trials. *Bmj*.  
17  
18 2013;346:e7586.  
19
- 20 12. Department of Health (DH). Toolkit for producing patient information. London, The  
21  
22 Department of Health; 2003.  
23
- 24 13. BCC. Breast Cancer Campaign [Available from:  
25  
26 <http://www.breastcancercare.org.uk/>.  
27
- 28 14. Harrington S, Michener LA, Kendig T, Miale S, George SZ. Patient-reported upper  
29  
30 extremity outcome measures used in breast cancer survivors: a systematic review. *Archives*  
31  
32 *of physical medicine and rehabilitation*. 2014;95(1):153-62.  
33
- 34 15. Dixon D, Johnston M, McQueen M, Court-Brown C. The Disabilities of the Arm,  
35  
36 Shoulder and Hand Questionnaire (DASH) can measure the impairment, activity limitations  
37  
38 and participation restriction constructs from the International Classification of Functioning,  
39  
40 Disability and Health (ICF). *BMC musculoskeletal disorders*. 2008;9:114.  
41
- 42 16. Beurskens CH, van Uden CJ, Strobbe LJ, Oostendorp RA, Wobbes T. The efficacy  
43  
44 of physiotherapy upon shoulder function following axillary dissection in breast cancer, a  
45  
46 randomized controlled study. *BMC cancer*. 2007;7:166.  
47
- 48 17. Sorensen AA, Howard D, Tan WH, Ketchersid J, Calfee RP. Minimal clinically  
49  
50 important differences of 3 patient-rated outcomes instruments. *The Journal of hand surgery*.  
51  
52 2013;38(4):641-9.  
53  
54  
55  
56  
57  
58  
59  
60

- 1  
2  
3 18. Dunn G, Maracy M, Tomenson B. Estimating treatment effects from randomized  
4 clinical trials with noncompliance and loss to follow-up: the role of instrumental variable  
5 methods. *Statistical methods in medical research*. 2005;14(4):369-95.  
6  
7
- 8 19. Perneger TV, Burnand B. A simple imputation algorithm reduced missing data in SF-  
9 12 health surveys. *Journal of clinical epidemiology*. 2005;58(2):142-9.  
10  
11
- 12 20. Knox CR, Lall R, Hansen Z, Lamb SE. Treatment compliance and effectiveness of a  
13 cognitive behavioural intervention for low back pain: a complier average causal effect  
14 approach to the BeST data set. *BMC musculoskeletal disorders*. 2014;15:17.  
15  
16
- 17 21. Williams MA, Williamson EM, Heine PJ, Nichols V, Glover MJ, Dritsaki M, et al.  
18 Strengthening And stretching for Rheumatoid Arthritis of the Hand (SARAH). A randomised  
19 controlled trial and economic evaluation. *Health Technol Assess*. 2015;19(19):1-222.  
20  
21
- 22 22. NICE. *Guide to the Methods of Technology Appraisal 2013* [Available from:  
23 <http://publications.nice.org.uk/guide-to-the-methods-of-technology-appraisal-2013-pmg9>.  
24  
25  
26  
27
- 28 23. Hollis S, Campbell F. What is meant by intention to treat analysis? Survey of  
29 published randomised controlled trials. *Bmj*. 1999;319(7211):670-4.  
30  
31
- 32 24. Dolan P. Modeling valuations for EuroQol health states. *Medical care*.  
33 1997;35(11):1095-108.  
34  
35
- 36 25. van Hout B, Janssen MF, Feng YS, Kohlmann T, Busschbach J, Golicki D, et al.  
37 Interim scoring for the EQ-5D-5L: mapping the EQ-5D-5L to EQ-5D-3L value sets. *Value in*  
38 *health : the journal of the International Society for Pharmacoeconomics and Outcomes*  
39 *Research*. 2012;15(5):708-15.  
40  
41  
42  
43
- 44 26. Herdman M, Gudex C, Lloyd A, Janssen M, Kind P, Parkin D, et al. Development and  
45 preliminary testing of the new five-level version of EQ-5D (EQ-5D-5L). *Quality of life*  
46 *research : an international journal of quality of life aspects of treatment, care and*  
47 *rehabilitation*. 2011;20(10):1727-36.  
48  
49  
50  
51
- 52 27. Brazier J, Roberts J, Deverill M. The estimation of a preference-based measure of  
53 health from the SF-36. *Journal of health economics*. 2002;21(2):271-92.  
54  
55  
56  
57

- 1  
2  
3 28. Devlin N, Shah K, Feng Y, Mulhern B, van Hout B. Valuing health-related quality of  
4 life: an EQ-5D-5L value set for England. 2016.  
5  
6 29. Sculpher MJ, Claxton K, Drummond M, McCabe C. Whither trial-based economic  
7 evaluation for health care decision making? Health economics. 2006;15(7):677-87.  
8  
9 30. Moher D, Schulz KF, Altman DG. The CONSORT statement: revised  
10 recommendations for improving the quality of reports of parallel-group randomised trials.  
11 Lancet. 2001;357(9263):1191-4.  
12  
13  
14  
15  
16  
17  
18  
19  
20  
21  
22  
23  
24  
25  
26  
27  
28  
29  
30  
31  
32  
33  
34  
35  
36  
37  
38  
39  
40  
41  
42  
43  
44  
45  
46  
47  
48  
49  
50  
51  
52  
53  
54  
55  
56  
57  
58  
59  
60

1  
2  
3  
4  
5  
6  
7  
8  
9  
10  
11  
12  
13  
14  
15  
16  
17  
18  
19  
20  
21  
22  
23  
24  
25  
26  
27  
28  
29  
30  
31  
32  
33  
34  
35  
36  
37  
38  
39  
40  
41  
42  
43  
44  
45  
46  
47

**Figure 1 Study outcome measures and assessment time points**

**Figure 2 Trial flow diagram**

For peer review only

**Table 1 World Health Organisation Trial Registration Data Set**

| <b>Data category</b>                          | <b>Information</b>                                                                                                                                                                                                        |
|-----------------------------------------------|---------------------------------------------------------------------------------------------------------------------------------------------------------------------------------------------------------------------------|
| Primary registry and trial identifying number | ISRCTN35358984                                                                                                                                                                                                            |
| Date of registration in primary registry      | Project Number 13/84/10                                                                                                                                                                                                   |
| Secondary identifying numbers                 | HTA                                                                                                                                                                                                                       |
| Source of monetary or material support        | National Institute for Health Research (NIHR) Health Technology Assessment (HTA)                                                                                                                                          |
| Joint sponsor                                 | University of Warwick / University Hospitals Coventry & Warwickshire NHS Trust                                                                                                                                            |
| Contact for public queries                    | <a href="mailto:prosper@warwick.ac.uk">prosper@warwick.ac.uk</a>                                                                                                                                                          |
| Contact for scientific queries                | Prof Julie Bruce, Warwick Clinical Trials Unit, University of Warwick                                                                                                                                                     |
| Public Title                                  | Exercise to prevent shoulder problems in patients undergoing breast cancer treatment                                                                                                                                      |
| Scientific Title                              | The PRevention Of Shoulder ProbleMs TRial (PROSPER): a randomised controlled clinical trial comparing physiotherapy-led exercise versus usual care in women at high risk of shoulder problems after breast cancer surgery |
| Countries of recruitment                      | UK                                                                                                                                                                                                                        |
| Health condition or problem studied           | Breast cancer                                                                                                                                                                                                             |
| Interventions                                 | Advice only: Breast Cancer Care leaflets<br>Comparator: Physiotherapy-led structured exercise programme incorporating behavioural                                                                                         |

1  
2  
3  
4  
5  
6  
7  
8  
9  
10  
11  
12  
13  
14  
15  
16  
17  
18  
19  
20  
21  
22  
23  
24  
25  
26  
27  
28  
29  
30  
31  
32  
33  
34  
35  
36  
37  
38  
39  
40  
41  
42  
43  
44  
45  
46  
47

|                                      |                                                                                                                                                                                                                                                                                                                                           |
|--------------------------------------|-------------------------------------------------------------------------------------------------------------------------------------------------------------------------------------------------------------------------------------------------------------------------------------------------------------------------------------------|
|                                      | strategies                                                                                                                                                                                                                                                                                                                                |
| Key inclusion and exclusion criteria | Age: 18 years or over, no upper age restriction<br><br>Sex: Female<br><br>Inclusion: confirmed invasive/non-invasive primary breast cancer schedule for surgical excision, at high risk of shoulder problems as defined by criteria given in Table 2.<br><br>Exclusion: males, and women with exclusion criteria as described in Table 2. |
| Study type                           | Interventional<br><br>Allocation: randomised; individual assignment.<br><br>Primary purpose: prevention.<br><br>Phase III                                                                                                                                                                                                                 |
| Date of first enrolment              | January 2016                                                                                                                                                                                                                                                                                                                              |
| Target sample size                   | 350                                                                                                                                                                                                                                                                                                                                       |
| Recruitment status                   | Recruiting to July 2017                                                                                                                                                                                                                                                                                                                   |
| Primary outcome                      | Arm, shoulder and hand function as measured using the Disabilities of the Arm, Shoulder and Hand (DASH) questionnaire at 12 months                                                                                                                                                                                                        |
| Key secondary outcomes               | DASH subscales, pain (acute, chronic, neuropathic), health-related quality of life, surgical site infection, lymphoedema and other complications, health care resource use.                                                                                                                                                               |



1  
2  
3  
4  
5  
6  
7  
8  
9  
10  
11  
12  
13  
14  
15  
16  
17  
18  
19  
20  
21  
22  
23  
24  
25  
26  
27  
28  
29  
30  
31  
32  
33  
34  
35  
36  
37  
38  
39  
40  
41  
42  
43  
44  
45  
46  
47

|  |                                                              |
|--|--------------------------------------------------------------|
|  | Exercise/activity data to inform adherence to interventions. |
|--|--------------------------------------------------------------|

For peer review only

**Table 2. Trial inclusion and exclusion criteria**

| Inclusion Criteria                                                                                                                                                                                                                                                                                                                                  | Exclusion Criteria                                                                                                          |
|-----------------------------------------------------------------------------------------------------------------------------------------------------------------------------------------------------------------------------------------------------------------------------------------------------------------------------------------------------|-----------------------------------------------------------------------------------------------------------------------------|
| Aged $\geq 18$ years old                                                                                                                                                                                                                                                                                                                            | Males                                                                                                                       |
| Histologically confirmed invasive or non-invasive primary breast cancer scheduled for surgical excision of breast cancer                                                                                                                                                                                                                            | Women having immediate reconstructive surgery                                                                               |
| Considered high risk of developing shoulder problems after surgery defined by one or more of the following: <ul style="list-style-type: none"> <li>• Planned axillary node clearance</li> <li>• Planned radiotherapy to the axilla and/or supraclavicular*</li> <li>• Existing shoulder problems (based upon PROSPER screening criteria)</li> </ul> | Women having sentinel lymph node biopsy (SLNB), with or without breast surgery, unless they fulfil other high risk criteria |
| Obesity defined as BMI $>30$                                                                                                                                                                                                                                                                                                                        | Women having bilateral breast surgery                                                                                       |
| Any subsequent axillary surgery related to primary surgery e.g. ANC conducted after sentinel lymph node biopsy (SLNB)                                                                                                                                                                                                                               | Evidence of metastatic disease at time of recruitment                                                                       |
| Able to provide written informed consent                                                                                                                                                                                                                                                                                                            |                                                                                                                             |
| Willing and able to comply with the protocol                                                                                                                                                                                                                                                                                                        |                                                                                                                             |
| <i>*includes women informed of need for radiotherapy to the axilla and/or supraclavicular within six weeks of surgery, thus potential late entry to the trial is allowed in this setting</i>                                                                                                                                                        |                                                                                                                             |

**Table 3. Outcome assessment**

| Outcome   | Domain                      | Scale / measure   | T <sub>0</sub><br>baseline | t <sub>1</sub><br>6 weeks | t <sub>2</sub><br>6 months | t <sub>3</sub><br>12 months |
|-----------|-----------------------------|-------------------|----------------------------|---------------------------|----------------------------|-----------------------------|
| Primary   | Function                    | DASH              |                            |                           |                            | √                           |
| Secondary | Function                    | DASH subscales    | √                          |                           | √                          | √                           |
|           | Acute & chronic pain        | FACT-B+4; NRS     | √                          | √                         | √                          | √                           |
|           | Neuropathic pain            | DN4               | √                          | √                         | √                          | √                           |
|           | Complications               | SSI + self-report |                            | √                         | √                          | √                           |
|           | Lymphoedema                 | Self-report       | √                          | √                         | √                          | √                           |
|           | Health-related QoL          | SF12 / EQ-5D-5L   | √                          |                           | √                          | √                           |
|           | Resource use                | Self-report       |                            |                           | √                          | √                           |
|           | General activity & exercise | PASE items        | √                          | √                         | √                          | √                           |

DASH: Disabilities of Arm, Shoulder and Hand questionnaire; DN4: Doleur Neuropathique; SF12: Short Form-12; SSI: surgical site infection; EQ-5D-5L: Euroqol; t: time point; QoL: Quality of Life; PASE: Physical Activity Scale for the Elderly.

Figure 1. Study outcome measures and assessment time points

| Time point                | Study period |                  |                  |                   |                    |
|---------------------------|--------------|------------------|------------------|-------------------|--------------------|
|                           | Enrolment    | Allocation       | Post-allocation  |                   |                    |
|                           | $-t_1$       | $0$              | $t_1$<br>6 weeks | $t_2$<br>6 months | $t_3$<br>12 months |
| <b>Enrolment:</b>         |              |                  |                  |                   |                    |
| Eligibility screen        | √            |                  |                  |                   |                    |
| Informed consent          | √            |                  |                  |                   |                    |
| Randomisation             | 350          | √                |                  |                   |                    |
| <b>Interventions</b>      |              |                  |                  |                   |                    |
| Usual Care (UC)           | 175          | All participants | ←→               |                   |                    |
| UC + PROSPER intervention | 175          |                  | ←→               | →                 |                    |

Figure 1 Study outcome measures and assessment time points

87x46mm (300 x 300 DPI)

Figure 2. Trial flow diagram

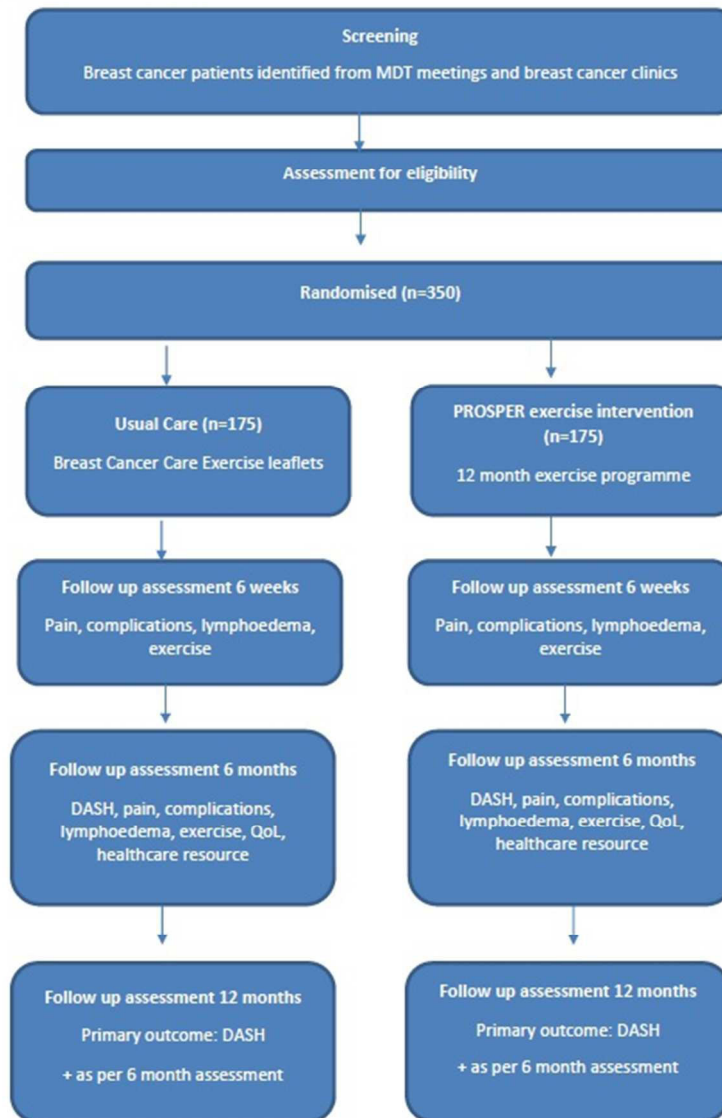

Figure 2 Trial flow diagram

50x65mm (300 x 300 DPI)



SPIRIT 2013 Checklist: Recommended items to address in a clinical trial protocol and related documents\*

| Section/item                      | Item No | Description                                                                                                                                                                                                                                                                              | Addressed on page number |
|-----------------------------------|---------|------------------------------------------------------------------------------------------------------------------------------------------------------------------------------------------------------------------------------------------------------------------------------------------|--------------------------|
| <b>Administrative information</b> |         |                                                                                                                                                                                                                                                                                          |                          |
| Title                             | 1       | Descriptive title identifying the study design, population, interventions, and, if applicable, trial acronym                                                                                                                                                                             | 1                        |
| Trial registration                | 2a      | Trial identifier and registry name. If not yet registered, name of intended registry                                                                                                                                                                                                     | 4                        |
|                                   | 2b      | All items from the World Health Organization Trial Registration Data Set                                                                                                                                                                                                                 | Table 1                  |
| Protocol version                  | 3       | Date and version identifier                                                                                                                                                                                                                                                              | 3 & 22                   |
| Funding                           | 4       | Sources and types of financial, material, and other support                                                                                                                                                                                                                              | 25 & Table 1             |
| Roles and responsibilities        | 5a      | Names, affiliations, and roles of protocol contributors                                                                                                                                                                                                                                  | 24-25                    |
|                                   | 5b      | Name and contact information for the trial sponsor                                                                                                                                                                                                                                       | Table 1                  |
|                                   | 5c      | Role of study sponsor and funders, if any, in study design; collection, management, analysis, and interpretation of data; writing of the report; and the decision to submit the report for publication, including whether they will have ultimate authority over any of these activities | 25-6                     |
|                                   | 5d      | Composition, roles, and responsibilities of the coordinating centre, steering committee, endpoint adjudication committee, data management team, and other individuals or groups overseeing the trial, if applicable (see Item 21a for data monitoring committee)                         | 24                       |

## Introduction

|                          |    |                                                                                                                                                                                                           |         |
|--------------------------|----|-----------------------------------------------------------------------------------------------------------------------------------------------------------------------------------------------------------|---------|
| Background and rationale | 6a | Description of research question and justification for undertaking the trial, including summary of relevant studies (published and unpublished) examining benefits and harms for each intervention        | 5 - 7   |
|                          | 6b | Explanation for choice of comparators                                                                                                                                                                     | 10 – 12 |
| Objectives               | 7  | Specific objectives or hypotheses                                                                                                                                                                         | 8       |
| Trial design             | 8  | Description of trial design including type of trial (eg, parallel group, crossover, factorial, single group), allocation ratio, and framework (eg, superiority, equivalence, noninferiority, exploratory) | 8 - 9   |

## Methods: Participants, interventions, and outcomes

|                      |     |                                                                                                                                                                                                                                                                                                                                                                                |                                      |
|----------------------|-----|--------------------------------------------------------------------------------------------------------------------------------------------------------------------------------------------------------------------------------------------------------------------------------------------------------------------------------------------------------------------------------|--------------------------------------|
| Study setting        | 9   | Description of study settings (eg, community clinic, academic hospital) and list of countries where data will be collected. Reference to where list of study sites can be obtained                                                                                                                                                                                             | 8                                    |
| Eligibility criteria | 10  | Inclusion and exclusion criteria for participants. If applicable, eligibility criteria for study centres and individuals who will perform the interventions (eg, surgeons, psychotherapists)                                                                                                                                                                                   | 8 – 9                                |
| Interventions        | 11a | Interventions for each group with sufficient detail to allow replication, including how and when they will be administered                                                                                                                                                                                                                                                     | 10-12 + separate intervention papers |
|                      | 11b | Criteria for discontinuing or modifying allocated interventions for a given trial participant (eg, drug dose change in response to harms, participant request, or improving/worsening disease)                                                                                                                                                                                 | 22                                   |
|                      | 11c | Strategies to improve adherence to intervention protocols, and any procedures for monitoring adherence (eg, drug tablet return, laboratory tests)                                                                                                                                                                                                                              | 12                                   |
|                      | 11d | Relevant concomitant care and interventions that are permitted or prohibited during the trial                                                                                                                                                                                                                                                                                  | 12                                   |
| Outcomes             | 12  | Primary, secondary, and other outcomes, including the specific measurement variable (eg, systolic blood pressure), analysis metric (eg, change from baseline, final value, time to event), method of aggregation (eg, median, proportion), and time point for each outcome. Explanation of the clinical relevance of chosen efficacy and harm outcomes is strongly recommended | Table 2                              |
| Participant timeline | 13  | Time schedule of enrolment, interventions (including any run-ins and washouts), assessments, and visits for participants. A schematic diagram is highly recommended (see Figure)                                                                                                                                                                                               | Figure 1                             |

1  
2  
3  
4  
5  
6  
7  
8  
9  
10  
11  
12  
13  
14  
15  
16  
17  
18  
19  
20  
21  
22  
23  
24  
25  
26  
27  
28  
29  
30  
31  
32  
33  
34  
35  
36  
37  
38  
39  
40  
41  
42  
43  
44  
45  
46  
47

|             |    |                                                                                                                                                                                       |    |
|-------------|----|---------------------------------------------------------------------------------------------------------------------------------------------------------------------------------------|----|
| Sample size | 14 | Estimated number of participants needed to achieve study objectives and how it was determined, including clinical and statistical assumptions supporting any sample size calculations | 16 |
| Recruitment | 15 | Strategies for achieving adequate participant enrolment to reach target sample size                                                                                                   | 9  |

**Methods: Assignment of interventions (for controlled trials)**

Allocation:

|                                  |     |                                                                                                                                                                                                                                                                                                                                                          |    |
|----------------------------------|-----|----------------------------------------------------------------------------------------------------------------------------------------------------------------------------------------------------------------------------------------------------------------------------------------------------------------------------------------------------------|----|
| Sequence generation              | 16a | Method of generating the allocation sequence (eg, computer-generated random numbers), and list of any factors for stratification. To reduce predictability of a random sequence, details of any planned restriction (eg, blocking) should be provided in a separate document that is unavailable to those who enrol participants or assign interventions | 9  |
| Allocation concealment mechanism | 16b | Mechanism of implementing the allocation sequence (eg, central telephone; sequentially numbered, opaque, sealed envelopes), describing any steps to conceal the sequence until interventions are assigned                                                                                                                                                | 9  |
| Implementation                   | 16c | Who will generate the allocation sequence, who will enrol participants, and who will assign participants to interventions                                                                                                                                                                                                                                | 10 |
| Blinding (masking)               | 17a | Who will be blinded after assignment to interventions (eg, trial participants, care providers, outcome assessors, data analysts), and how                                                                                                                                                                                                                | 10 |
|                                  | 17b | If blinded, circumstances under which unblinding is permissible, and procedure for revealing a participant's allocated intervention during the trial                                                                                                                                                                                                     | 10 |

**Methods: Data collection, management, and analysis**

|                         |     |                                                                                                                                                                                                                                                                                                                                                                                                              |              |
|-------------------------|-----|--------------------------------------------------------------------------------------------------------------------------------------------------------------------------------------------------------------------------------------------------------------------------------------------------------------------------------------------------------------------------------------------------------------|--------------|
| Data collection methods | 18a | Plans for assessment and collection of outcome, baseline, and other trial data, including any related processes to promote data quality (eg, duplicate measurements, training of assessors) and a description of study instruments (eg, questionnaires, laboratory tests) along with their reliability and validity, if known. Reference to where data collection forms can be found, if not in the protocol | 11 & Table 2 |
|                         | 18b | Plans to promote participant retention and complete follow-up, including list of any outcome data to be collected for participants who discontinue or deviate from intervention protocols                                                                                                                                                                                                                    | 11 & 14      |



|    |                                 |     |                                                                                                                                                                                                                                                                                                                                       |                                       |
|----|---------------------------------|-----|---------------------------------------------------------------------------------------------------------------------------------------------------------------------------------------------------------------------------------------------------------------------------------------------------------------------------------------|---------------------------------------|
| 1  |                                 |     |                                                                                                                                                                                                                                                                                                                                       |                                       |
| 2  |                                 |     |                                                                                                                                                                                                                                                                                                                                       |                                       |
| 3  | Data management                 | 19  | Plans for data entry, coding, security, and storage, including any related processes to promote data quality (eg, double data entry; range checks for data values). Reference to where details of data management procedures can be found, if not in the protocol                                                                     | 20                                    |
| 4  |                                 |     |                                                                                                                                                                                                                                                                                                                                       |                                       |
| 5  |                                 |     |                                                                                                                                                                                                                                                                                                                                       |                                       |
| 6  |                                 |     |                                                                                                                                                                                                                                                                                                                                       |                                       |
| 7  | Statistical methods             | 20a | Statistical methods for analysing primary and secondary outcomes. Reference to where other details of the statistical analysis plan can be found, if not in the protocol                                                                                                                                                              | 17-20                                 |
| 8  |                                 |     |                                                                                                                                                                                                                                                                                                                                       |                                       |
| 9  |                                 |     |                                                                                                                                                                                                                                                                                                                                       |                                       |
| 10 |                                 | 20b | Methods for any additional analyses (eg, subgroup and adjusted analyses)                                                                                                                                                                                                                                                              | 17-20                                 |
| 11 |                                 |     |                                                                                                                                                                                                                                                                                                                                       |                                       |
| 12 |                                 | 20c | Definition of analysis population relating to protocol non-adherence (eg, as randomised analysis), and any statistical methods to handle missing data (eg, multiple imputation)                                                                                                                                                       | 18-20                                 |
| 13 |                                 |     |                                                                                                                                                                                                                                                                                                                                       |                                       |
| 14 |                                 |     |                                                                                                                                                                                                                                                                                                                                       |                                       |
| 15 | <b>Methods: Monitoring</b>      |     |                                                                                                                                                                                                                                                                                                                                       |                                       |
| 16 |                                 |     |                                                                                                                                                                                                                                                                                                                                       |                                       |
| 17 | Data monitoring                 | 21a | Composition of data monitoring committee (DMC); summary of its role and reporting structure; statement of whether it is independent from the sponsor and competing interests; and reference to where further details about its charter can be found, if not in the protocol. Alternatively, an explanation of why a DMC is not needed | 22                                    |
| 18 |                                 |     |                                                                                                                                                                                                                                                                                                                                       |                                       |
| 19 |                                 |     |                                                                                                                                                                                                                                                                                                                                       |                                       |
| 20 |                                 |     |                                                                                                                                                                                                                                                                                                                                       |                                       |
| 21 |                                 |     |                                                                                                                                                                                                                                                                                                                                       |                                       |
| 22 |                                 | 21b | Description of any interim analyses and stopping guidelines, including who will have access to these interim results and make the final decision to terminate the trial                                                                                                                                                               | 20                                    |
| 23 |                                 |     |                                                                                                                                                                                                                                                                                                                                       |                                       |
| 24 |                                 |     |                                                                                                                                                                                                                                                                                                                                       |                                       |
| 25 | Harms                           | 22  | Plans for collecting, assessing, reporting, and managing solicited and spontaneously reported adverse events and other unintended effects of trial interventions or trial conduct                                                                                                                                                     | 22                                    |
| 26 |                                 |     |                                                                                                                                                                                                                                                                                                                                       |                                       |
| 27 |                                 |     |                                                                                                                                                                                                                                                                                                                                       |                                       |
| 28 | Auditing                        | 23  | Frequency and procedures for auditing trial conduct, if any, and whether the process will be independent from investigators and the sponsor                                                                                                                                                                                           | 12 & described in intervention papers |
| 29 |                                 |     |                                                                                                                                                                                                                                                                                                                                       |                                       |
| 30 |                                 |     |                                                                                                                                                                                                                                                                                                                                       |                                       |
| 31 |                                 |     |                                                                                                                                                                                                                                                                                                                                       |                                       |
| 32 | <b>Ethics and dissemination</b> |     |                                                                                                                                                                                                                                                                                                                                       |                                       |
| 33 |                                 |     |                                                                                                                                                                                                                                                                                                                                       |                                       |
| 34 | Research ethics approval        | 24  | Plans for seeking research ethics committee/institutional review board (REC/IRB) approval                                                                                                                                                                                                                                             | 22                                    |
| 35 |                                 |     |                                                                                                                                                                                                                                                                                                                                       |                                       |
| 36 |                                 |     |                                                                                                                                                                                                                                                                                                                                       |                                       |
| 37 | Protocol amendments             | 25  | Plans for communicating important protocol modifications (eg, changes to eligibility criteria, outcomes, analyses) to relevant parties (eg, investigators, REC/IRBs, trial participants, trial registries, journals, regulators)                                                                                                      | 4                                     |
| 38 |                                 |     |                                                                                                                                                                                                                                                                                                                                       |                                       |
| 39 |                                 |     |                                                                                                                                                                                                                                                                                                                                       |                                       |
| 40 |                                 |     |                                                                                                                                                                                                                                                                                                                                       |                                       |
| 41 |                                 |     |                                                                                                                                                                                                                                                                                                                                       |                                       |
| 42 |                                 |     |                                                                                                                                                                                                                                                                                                                                       |                                       |
| 43 |                                 |     |                                                                                                                                                                                                                                                                                                                                       |                                       |
| 44 |                                 |     |                                                                                                                                                                                                                                                                                                                                       |                                       |
| 45 |                                 |     |                                                                                                                                                                                                                                                                                                                                       |                                       |
| 46 |                                 |     |                                                                                                                                                                                                                                                                                                                                       |                                       |
| 47 |                                 |     |                                                                                                                                                                                                                                                                                                                                       |                                       |

|    |                               |     |                                                                                                                                                                                                                                                                                     |                                          |
|----|-------------------------------|-----|-------------------------------------------------------------------------------------------------------------------------------------------------------------------------------------------------------------------------------------------------------------------------------------|------------------------------------------|
| 1  |                               |     |                                                                                                                                                                                                                                                                                     |                                          |
| 2  |                               |     |                                                                                                                                                                                                                                                                                     |                                          |
| 3  | Consent or assent             | 26a | Who will obtain informed consent or assent from potential trial participants or authorised surrogates, and how (see Item 32)                                                                                                                                                        | 9                                        |
| 4  |                               |     |                                                                                                                                                                                                                                                                                     |                                          |
| 5  |                               |     |                                                                                                                                                                                                                                                                                     |                                          |
| 6  |                               | 26b | Additional consent provisions for collection and use of participant data and biological specimens in ancillary studies, if applicable                                                                                                                                               | 9 & 21                                   |
| 7  |                               |     |                                                                                                                                                                                                                                                                                     |                                          |
| 8  |                               |     |                                                                                                                                                                                                                                                                                     |                                          |
| 9  | Confidentiality               | 27  | How personal information about potential and enrolled participants will be collected, shared, and maintained in order to protect confidentiality before, during, and after the trial                                                                                                | 9                                        |
| 10 |                               |     |                                                                                                                                                                                                                                                                                     |                                          |
| 11 |                               |     |                                                                                                                                                                                                                                                                                     |                                          |
| 12 | Declaration of interests      | 28  | Financial and other competing interests for principal investigators for the overall trial and each study site                                                                                                                                                                       | 24                                       |
| 13 |                               |     |                                                                                                                                                                                                                                                                                     |                                          |
| 14 |                               |     |                                                                                                                                                                                                                                                                                     |                                          |
| 15 | Access to data                | 29  | Statement of who will have access to the final trial dataset, and disclosure of contractual agreements that limit such access for investigators                                                                                                                                     | 26                                       |
| 16 |                               |     |                                                                                                                                                                                                                                                                                     |                                          |
| 17 |                               |     |                                                                                                                                                                                                                                                                                     |                                          |
| 18 | Ancillary and post-trial care | 30  | Provisions, if any, for ancillary and post-trial care, and for compensation to those who suffer harm from trial participation                                                                                                                                                       | 12                                       |
| 19 |                               |     |                                                                                                                                                                                                                                                                                     |                                          |
| 20 |                               |     |                                                                                                                                                                                                                                                                                     |                                          |
| 21 | Dissemination policy          | 31a | Plans for investigators and sponsor to communicate trial results to participants, healthcare professionals, the public, and other relevant groups (eg, via publication, reporting in results databases, or other data sharing arrangements), including any publication restrictions | 3-4 & 20                                 |
| 22 |                               |     |                                                                                                                                                                                                                                                                                     |                                          |
| 23 |                               |     |                                                                                                                                                                                                                                                                                     |                                          |
| 24 |                               |     |                                                                                                                                                                                                                                                                                     |                                          |
| 25 |                               | 31b | Authorship eligibility guidelines and any intended use of professional writers                                                                                                                                                                                                      | 3                                        |
| 26 |                               |     |                                                                                                                                                                                                                                                                                     |                                          |
| 27 |                               | 31c | Plans, if any, for granting public access to the full protocol, participant-level dataset, and statistical code                                                                                                                                                                     | 24                                       |
| 28 |                               |     |                                                                                                                                                                                                                                                                                     |                                          |
| 29 | <b>Appendices</b>             |     |                                                                                                                                                                                                                                                                                     |                                          |
| 30 |                               |     |                                                                                                                                                                                                                                                                                     |                                          |
| 31 | Informed consent materials    | 32  | Model consent form and other related documentation given to participants and authorised surrogates                                                                                                                                                                                  | Can be provided as Appendix if requested |
| 32 |                               |     |                                                                                                                                                                                                                                                                                     |                                          |
| 33 |                               |     |                                                                                                                                                                                                                                                                                     |                                          |
| 34 |                               |     |                                                                                                                                                                                                                                                                                     |                                          |
| 35 | Biological specimens          | 33  | Plans for collection, laboratory evaluation, and storage of biological specimens for genetic or molecular analysis in the current trial and for future use in ancillary studies, if applicable                                                                                      | Not applicable                           |
| 36 |                               |     |                                                                                                                                                                                                                                                                                     |                                          |
| 37 |                               |     |                                                                                                                                                                                                                                                                                     |                                          |

\*It is strongly recommended that this checklist be read in conjunction with the SPIRIT 2013 Explanation & Elaboration for important clarification on the items. Amendments to the protocol should be tracked and dated. The SPIRIT checklist is copyrighted by the SPIRIT Group under the Creative Commons "[Attribution-NonCommercial-NoDerivs 3.0 Unported](https://creativecommons.org/licenses/by-nc-nd/3.0/)" license.

# BMJ Open

## A randomised controlled trial of exercise to prevent shoulder problems in women undergoing breast cancer treatment: study protocol for the Prevention of Shoulder Problems Trial (UK PROSPER Trial)

|                                 |                                                                                                                                                                                                                                                                                                                                                                                                                                                                                                                                                                                                                                                                                                                                                                                                                                                                                                                                                                                                                                                                          |
|---------------------------------|--------------------------------------------------------------------------------------------------------------------------------------------------------------------------------------------------------------------------------------------------------------------------------------------------------------------------------------------------------------------------------------------------------------------------------------------------------------------------------------------------------------------------------------------------------------------------------------------------------------------------------------------------------------------------------------------------------------------------------------------------------------------------------------------------------------------------------------------------------------------------------------------------------------------------------------------------------------------------------------------------------------------------------------------------------------------------|
| Journal:                        | <i>BMJ Open</i>                                                                                                                                                                                                                                                                                                                                                                                                                                                                                                                                                                                                                                                                                                                                                                                                                                                                                                                                                                                                                                                          |
| Manuscript ID                   | bmjopen-2017-019078.R2                                                                                                                                                                                                                                                                                                                                                                                                                                                                                                                                                                                                                                                                                                                                                                                                                                                                                                                                                                                                                                                   |
| Article Type:                   | Protocol                                                                                                                                                                                                                                                                                                                                                                                                                                                                                                                                                                                                                                                                                                                                                                                                                                                                                                                                                                                                                                                                 |
| Date Submitted by the Author:   | 04-Jan-2018                                                                                                                                                                                                                                                                                                                                                                                                                                                                                                                                                                                                                                                                                                                                                                                                                                                                                                                                                                                                                                                              |
| Complete List of Authors:       | Bruce, Julie; University of Warwick, Warwick Clinical Trials Unit<br>Williamson, Esther; Nuffield Department of Orthopaedics, Rheumatology and Musculoskeletal Sciences, University of Oxford, United Kingdom. , Centre for Rehabilitation Research in Oxford<br>Lait, Clare; Gloucestershire Care Services NHS Trust<br>Richmond, Helen ; University of Warwick, Warwick Clinical Trials Unit<br>Betteley, Lauren; University of Warwick Warwick Medical School, Warwick Clinical Trials Unit<br>Lall, Ranjit; University of Warwick, Warwick Clinical Trials Unit<br>Petrou, Stavros; University of Warwick, Warwick Medical School<br>Rees, Sophie; University of Warwick, Warwick Clinical Trials Unit<br>Withers, Emma; University of Warwick, Warwick Clinical Trials Unit<br>Lamb, Sarah; University of Oxford, Nuffield Department of Orthopaedics, Rheumatology and Musculoskeletal Sciences<br>Thompson, Alastair; University of Texas M.D. Anderson Cancer Center, Department of Breast Surgical Oncology and Department of Translational Molecular Pathology |
| <b>Primary Subject Heading</b>: | Rehabilitation medicine                                                                                                                                                                                                                                                                                                                                                                                                                                                                                                                                                                                                                                                                                                                                                                                                                                                                                                                                                                                                                                                  |
| Secondary Subject Heading:      | Surgery, Health services research, Oncology                                                                                                                                                                                                                                                                                                                                                                                                                                                                                                                                                                                                                                                                                                                                                                                                                                                                                                                                                                                                                              |
| Keywords:                       | Breast surgery < SURGERY, Clinical trials < THERAPEUTICS, Rehabilitation medicine < INTERNAL MEDICINE                                                                                                                                                                                                                                                                                                                                                                                                                                                                                                                                                                                                                                                                                                                                                                                                                                                                                                                                                                    |
|                                 |                                                                                                                                                                                                                                                                                                                                                                                                                                                                                                                                                                                                                                                                                                                                                                                                                                                                                                                                                                                                                                                                          |

SCHOLARONE™  
Manuscripts

1  
2  
3 **A randomised controlled trial of exercise to prevent shoulder problems in women**  
4 **undergoing breast cancer treatment: study protocol for the Prevention of Shoulder**  
5 **Problems Trial (UK PROSPER Trial)**  
6  
7

8  
9  
10 **Authors:** Julie Bruce<sup>1</sup>, Esther Williamson<sup>2</sup>, Clare Lait<sup>3</sup>, Helen Richmond<sup>1</sup>, Lauren Betteley<sup>1</sup>,  
11 Ranjit Lall<sup>1</sup>, Stavros Petrou<sup>1</sup>, Sophie Rees<sup>1</sup>, Emma J Withers<sup>1</sup>, Sarah E Lamb<sup>1,2</sup> and Alastair  
12 Thompson<sup>4</sup> on behalf of the PROSPER Study Group.  
13  
14  
15

16  
17  
18 **Author affiliations**  
19

- 20  
21 1. Warwick Clinical Trials Unit, Division of Health Sciences, University of Warwick,  
22 Coventry CV4 7AL, UK  
23  
24 2. Nuffield Department of Orthopaedics Rheumatology & Musculoskeletal Sciences,  
25 University of Oxford, Windmill Road, Oxford, OX3 7LD, UK  
26  
27 3. Gloucestershire Care Services NHS Trust, 1010 Gloucester Business Park, Pioneer  
28 Avenue, Brockworth, Gloucester, GL3 4AW, UK  
29  
30 4. Department of Breast Surgical Oncology & Department of Translational Molecular  
31 Pathology, University of Texas M.D. Anderson Cancer Center, 1400 Pressler Drive,  
32 Houston, Texas, US  
33  
34  
35  
36  
37  
38

39 **Corresponding author:** Professor Julie Bruce; [julie.bruce@warwick.ac.uk](mailto:julie.bruce@warwick.ac.uk)  
40  
41  
42  
43  
44  
45  
46  
47  
48  
49  
50  
51  
52  
53  
54  
55  
56  
57  
58  
59  
60

## Abstract

Musculoskeletal shoulder problems are common after breast cancer treatment. Early postoperative exercises targeting the upper limb may improve shoulder function. This protocol describes a National Institute for Health Research (NIHR) funded randomised controlled trial (RCT) to evaluate the clinical and cost-effectiveness of an early supervised structured exercise programme compared to usual care, for women at high risk of developing shoulder problems after breast cancer surgery.

## Methods

This pragmatic two-armed, multicentre RCT is underway within secondary care in the United Kingdom (UK). PROSPER aims to recruit 350 women from approximately 15 UK centres with follow-up at 6 weeks, 6 and 12 months after randomisation. Recruitment processes and intervention development were optimised through qualitative research during a six-month internal pilot phase. Participants are randomised to the PROSPER intervention or best practice usual care only. The PROSPER intervention is delivered by physiotherapists and incorporates three main components: shoulder-specific exercises targeting range of movement and strength; general physical activity; and behavioural strategies to encourage adherence and support exercise behaviour. The primary outcome is upper arm function assessed using the Disabilities of the Arm Shoulder and Hand (DASH) questionnaire at 12 months post-randomisation. Secondary outcomes include DASH subscales, acute and chronic pain, complications, health related quality of life, and healthcare resource use. We will interview a subsample of twenty participants to explore their experiences of the trial interventions.

## Discussion

The PROSPER study is the first multicentre UK clinical trial to investigate the clinical and cost-effectiveness of supported exercise in the prevention of shoulder problems in high risk women undergoing breast cancer surgery. The findings will inform future clinical practice and provide valuable insight into the role of physiotherapy-supported exercise in breast cancer rehabilitation.

1  
2  
3 **Trial registration:** ISRCTN35358984

4 **Protocol version:** Version 2.1; dated 11/01/2017

5  
6 **Funding:** NIHR HTA (Project Number 13/84/10)

7  
8  
9  
10 **Strengths and limitations of this study**

11  
12 **Strengths:**

- 13  
14
- 15 • A large pragmatic study delivering a complex intervention to prevent postoperative health
  - 16 problems in newly diagnosed cancer patients within secondary care;
  - 17
  - 18 • A strength of the evaluation is the mixed methods approach incorporating embedded
  - 19 qualitative research and economic analysis
  - 20
  - 21

22  
23 **Limitations:**

- 24
- 25 • Recruited participants undergo multiple cancer treatments thus experience a
  - 26 complicated postoperative recovery pathway.
  - 27
  - 28
  - 29
  - 30
  - 31
  - 32
  - 33
  - 34
  - 35
  - 36
  - 37
  - 38
  - 39
  - 40
  - 41
  - 42
  - 43
  - 44
  - 45
  - 46
  - 47
  - 48
  - 49
  - 50
  - 51
  - 52
  - 53
  - 54
  - 55
  - 56
  - 57
  - 58
  - 59
  - 60

## Background

Breast cancer is the most common cancer in women in the UK with a 30% increase in incidence since the early 1970s (1). Due to advances in screening and treatment, the survival rate has progressively risen and now two thirds of women will survive for 20 years beyond their breast cancer diagnosis (1). The mainstay treatment is surgery to the breast and axilla, supplemented with chemotherapy, radiotherapy and endocrine therapy, depending upon tumour stage and other clinical criteria. As a consequence of these treatments, upper limb problems such as decreased shoulder range of movement (ROM), impaired strength, chronic pain, sensory disturbances and lymphoedema are common adverse treatment effects (2, 3). Studies suggest that up to 67% of women have arm or shoulder symptoms up to 3 years after treatment (4). Persistent upper limb dysfunction and pain are debilitating, have a negative impact upon sleep, quality of life, physical functioning and emotional wellbeing. Given successes in increasing survival, it is timely to identify strategies to improve the health-related quality of life of women after breast cancer treatment.

Several risk factors for shoulder and upper body problems after breast cancer treatment have been identified, including treatment-related factors, such as type of axillary surgery and radiotherapy (RT), and patient factors such as age, body mass index (BMI), and pre-existing shoulder problems (4, 5). Women undergoing mastectomy compared to breast conserving surgery are at greater risk of postoperative shoulder restrictions (odds ratio (OR) 5.7, 95% confidence interval (CI) 1.03, 31.2) (4). Additionally, those undergoing axillary lymph node clearance (ANC) are at greater risk of postoperative arm complaints compared to those having sentinel lymph node biopsy (SLNB; OR 9.8; 95% CI 3.5, 27.5) (4-6). Radiotherapy (RT), particularly to the axilla or chest wall, increases the odds of shoulder restriction (pooled OR 1.7, 95% CI 1.0, 2.9) and lymphoedema (pooled OR 1.5, 95% CI 1.2, 1.8) compared to women treated without adjuvant RT (4). Women reporting problems in the upper body and shoulder region before surgery are also at increased risk of chronic postoperative pain (5, 7).

1  
2  
3 BMI at time of surgery has been shown to have an independent negative effect on shoulder  
4 external rotation up to seven years after breast cancer treatment, and increased BMI is a risk  
5 factor for chronic postoperative pain and arm lymphoedema (7, 8). It is important that the UK  
6 National Health Service (NHS) provides optimal care for these women at high risk of  
7 developing shoulder problems to ensure recovery and return to usual activities after cancer  
8 treatment.  
9  
10  
11  
12  
13  
14  
15

16  
17 A Cochrane review identified 24 studies (2132 participants) investigating exercise following  
18 breast cancer surgery (9). Six studies (n=354), conducted outside of the UK, found that  
19 structured postoperative exercise significantly improved shoulder ROM in the short and long  
20 term when compared to usual care (9). Ten studies (n=1304) have evaluated timing of  
21 exercise delivery; programmes initiated immediately postoperatively (1-3 days) versus  
22 delayed exercise suggest that early postoperative exercise does significantly improve long-  
23 term shoulder ROM. However, some studies reported an increased risk of wound-related  
24 complications with early exercise, such as seroma and surgical site infection (9). The largest  
25 UK trial to date (n=116 patients), published after the Cochrane review, found that  
26 participants were less likely to develop lymphoedema when exercises were limited to 90° of  
27 shoulder elevation during the first postoperative week compared to those performing  
28 unrestricted exercises (10). These previous trials investigating the efficacy of exercise  
29 following breast cancer surgery have been criticised for being of poor methodological quality  
30 and for omitting important patient-reported outcomes such as function and health-related  
31 quality of life (9). Furthermore, there is ongoing uncertainty around the optimal type, dose,  
32 and timing of exercise after breast cancer treatment. Moreover, none of the trials conducted  
33 to date have investigated the cost-effectiveness of structured exercise programmes after  
34 breast cancer treatment.  
35  
36  
37  
38  
39  
40  
41  
42  
43  
44  
45  
46  
47  
48  
49  
50  
51  
52  
53  
54  
55  
56  
57  
58  
59  
60



## Rationale for a trial

To date, no large scale, high-quality, multicentre RCT investigating the clinical effectiveness of a structured physiotherapy intervention compared to usual care for women undergoing breast cancer surgery has been conducted. Given the lack of knowledge regarding the intensity and duration of exercise interventions after breast cancer surgery, this trial will provide evidence on whether a rigorously designed physiotherapy-led intervention, incorporating behaviour change theory, improves postoperative function and related outcomes, and whether this is cost-effective to deliver in the NHS setting.

## Methods

### Aim

The overall aim of PROSPER is to investigate the clinical and cost-effectiveness of an early supervised exercise programme compared to best practice usual care for women at high risk of shoulder problems after treatment for breast cancer, on outcomes of upper arm function, complications and quality of life. Specific trial objectives are:

1. To develop and refine a complex intervention of physiotherapy-led exercise for women at risk of developing musculoskeletal problems after breast cancer treatment;
2. To assess the acceptability of the structured exercise programme and outcome measures, optimise participant recruitment and refine trial processes during a six-month internal pilot phase at three clinical centres;
3. Use findings from the internal pilot phase to undertake a definitive full RCT in approximately 15 UK NHS breast cancer centres.

This protocol follows guidance from the Standard Protocol Items: Recommendations for Interventional Trials (SPIRIT)(11). Core trial information is presented in Table 1 (WHO Trial Registration Data Set). Figure 1 details the schedule of enrolment, interventions and assessment.

**Table 1 World Health Organisation Trial Registration Data Set**

| <b>Data category</b>                          | <b>Information</b>                                                                                                                                                                                                        |
|-----------------------------------------------|---------------------------------------------------------------------------------------------------------------------------------------------------------------------------------------------------------------------------|
| Primary registry and trial identifying number | ISRCTN35358984                                                                                                                                                                                                            |
| Date of registration in primary registry      | Project Number 13/84/10                                                                                                                                                                                                   |
| Secondary identifying numbers                 | HTA                                                                                                                                                                                                                       |
| Source of monetary or material support        | National Institute for Health Research (NIHR) Health Technology Assessment (HTA)                                                                                                                                          |
| Joint sponsor                                 | University of Warwick / University Hospitals Coventry & Warwickshire NHS Trust                                                                                                                                            |
| Contact for public queries                    | <a href="mailto:prosper@warwick.ac.uk">prosper@warwick.ac.uk</a>                                                                                                                                                          |
| Contact for scientific queries                | Prof Julie Bruce, Warwick Clinical Trials Unit, University of Warwick                                                                                                                                                     |
| Public Title                                  | Exercise to prevent shoulder problems in patients undergoing breast cancer treatment                                                                                                                                      |
| Scientific Title                              | The PRevention Of Shoulder ProbleMs TRial (PROSPER): a randomised controlled clinical trial comparing physiotherapy-led exercise versus usual care in women at high risk of shoulder problems after breast cancer surgery |
| Countries of recruitment                      | UK                                                                                                                                                                                                                        |
| Health condition or problem studied           | Breast cancer                                                                                                                                                                                                             |
| Interventions                                 | Advice only: Breast Cancer Care leaflets<br>Comparator: Physiotherapy-led structured exercise programme incorporating behavioural                                                                                         |

|                                      |                                                                                                                                                                                                                                                                                                                                           |
|--------------------------------------|-------------------------------------------------------------------------------------------------------------------------------------------------------------------------------------------------------------------------------------------------------------------------------------------------------------------------------------------|
|                                      | strategies                                                                                                                                                                                                                                                                                                                                |
| Key inclusion and exclusion criteria | Age: 18 years or over, no upper age restriction<br><br>Sex: Female<br><br>Inclusion: confirmed invasive/non-invasive primary breast cancer schedule for surgical excision, at high risk of shoulder problems as defined by criteria given in Table 2.<br><br>Exclusion: males, and women with exclusion criteria as described in Table 2. |
| Study type                           | Interventional<br><br>Allocation: randomised; individual assignment.<br><br>Primary purpose: prevention.<br><br>Phase III                                                                                                                                                                                                                 |
| Date of first enrolment              | January 2016                                                                                                                                                                                                                                                                                                                              |
| Target sample size                   | 350                                                                                                                                                                                                                                                                                                                                       |
| Recruitment status                   | Recruiting to July 2017                                                                                                                                                                                                                                                                                                                   |
| Primary outcome                      | Arm, shoulder and hand function as measured using the Disabilities of the Arm, Shoulder and Hand (DASH) questionnaire at 12 months                                                                                                                                                                                                        |
| Key secondary outcomes               | DASH subscales, pain (acute, chronic, neuropathic), health-related quality of life, surgical site infection, lymphoedema and other complications, health care resource use.                                                                                                                                                               |

1  
2  
3  
4  
5  
6  
7  
8  
9  
10  
11  
12  
13  
14  
15  
16  
17  
18  
19  
20  
21  
22  
23  
24  
25  
26  
27  
28  
29  
30  
31  
32  
33  
34  
35  
36  
37  
38  
39  
40  
41  
42  
43  
44  
45  
46  
47

|  |                                                              |
|--|--------------------------------------------------------------|
|  | Exercise/activity data to inform adherence to interventions. |
|--|--------------------------------------------------------------|

For peer review only

### **Trial design and setting**

A multicentre, pragmatic, parallel, two-arm RCT with an internal pilot study and embedded economic evaluation and qualitative studies. The trial framework is superiority rather than equivalence or exploratory. The trial is currently open and recruiting from 17 NHS tertiary breast cancer centres across England. Participants are randomised in a 1:1 ratio between intervention and control arms.

### **Patient and public involvement (PPI) in trial design**

Four female PPI representatives, all of whom were treated for breast cancer, were consulted during the initial grant preparation, intervention development and trial set up. Our PPI representatives contributed to the design of the intervention and advised on recruitment-related issues; they provided valuable insight into the worries and concerns experienced during cancer treatment.

### **Eligibility Criteria**

Women are eligible to participate in PROSPER if they are: diagnosed with histologically confirmed invasive or non-invasive primary breast cancer scheduled for surgical excision; aged 18 years or over; can comply with the protocol; willing to provide written informed consent; and considered as being at high risk of developing postoperative shoulder problems (Table 2). This is a pragmatic trial and it is important that inclusion criteria reflect contemporary clinical practice. Therefore, women are also eligible where a later decision is made for postoperative radiotherapy (RT) to the axilla and/or supraclavicular region, thus changing their risk status from low to high. 'Late entry' women are eligible for the trial if the decision for postoperative RT is made within six weeks of surgery. Women who have had previous breast surgery (such as excision of a benign tumour or breast cyst) and those women who have had previous contralateral (opposite side) mastectomy, are eligible for invitation providing they fulfil high risk criteria for shoulder problems. Women having immediate reconstruction or bilateral breast surgery are ineligible as the usual NHS

postoperative care pathway often includes routine postoperative physiotherapy. Exclusion criteria are presented in Table 2.

**Table 2. Trial inclusion and exclusion criteria**

| Inclusion Criteria                                                                                                                                                                                                                                                                                                                                  | Exclusion Criteria                                                                                                          |
|-----------------------------------------------------------------------------------------------------------------------------------------------------------------------------------------------------------------------------------------------------------------------------------------------------------------------------------------------------|-----------------------------------------------------------------------------------------------------------------------------|
| Aged $\geq 18$ years old                                                                                                                                                                                                                                                                                                                            | Males                                                                                                                       |
| Histologically confirmed invasive or non-invasive primary breast cancer scheduled for surgical excision of breast cancer                                                                                                                                                                                                                            | Women having immediate reconstructive surgery                                                                               |
| Considered high risk of developing shoulder problems after surgery defined by one or more of the following: <ul style="list-style-type: none"> <li>• Planned axillary node clearance</li> <li>• Planned radiotherapy to the axilla and/or supraclavicular*</li> <li>• Existing shoulder problems (based upon PROSPER screening criteria)</li> </ul> | Women having sentinel lymph node biopsy (SLNB), with or without breast surgery, unless they fulfil other high risk criteria |
| Obesity defined as BMI $>30$                                                                                                                                                                                                                                                                                                                        | Women having bilateral breast surgery                                                                                       |
| Any subsequent axillary surgery related to primary surgery e.g. ANC conducted after sentinel lymph node biopsy (SLNB)                                                                                                                                                                                                                               | Evidence of metastatic disease at time of recruitment                                                                       |
| Able to provide written informed consent                                                                                                                                                                                                                                                                                                            |                                                                                                                             |
| Willing and able to comply with the protocol                                                                                                                                                                                                                                                                                                        |                                                                                                                             |
| <i>*includes women informed of need for radiotherapy to the axilla and/or supraclavicular within six weeks of surgery, thus potential late entry to the trial is allowed in this setting</i>                                                                                                                                                        |                                                                                                                             |

### **Participant screening, recruitment and consent**

Participants are screened and identified from multi-disciplinary team (MDT) meetings and preoperative breast/oncology clinic lists in secondary care. The initial screening process is undertaken by a member of the clinical team, research nurse or trained designee. Potentially

1  
2  
3 eligible patients are approached by clinical or research staff and are given a Patient  
4 Information Sheet (PIS) with further explanation of the trial. Figure 2 summarises participant  
5 flow.  
6  
7  
8  
9

### 10 **Allocation sequence generation and randomisation**

11  
12 Randomisation is based upon a computer-generated algorithm held and controlled centrally  
13 by the Warwick Clinical Trials Unit (WCTU) programming team, independent from the  
14 PROSPER trial team. The WCTU telephone randomisation service is used whereby  
15 randomisation occurs after eligibility and informed consent has been obtained. Concealment  
16 of allocation is maintained. An automated confirmation email of intervention allocation is  
17 generated to the study team. Randomisation is stratified by the following variables: (i) first  
18 versus repeat surgery; (ii) centre; and (iii) whether informed of the need for radiotherapy  
19 within six weeks of surgery. The first variable adjusts for the requirement for any additional  
20 surgery which may change risk status from low to high (e.g. second procedure ANC or  
21 reexcision of surgical margins). The second stratification variable ensures balanced  
22 allocation across each recruitment site. The third variable accounts for late entry to the trial,  
23 thus relates to the timing of intervention delivery and whether participants are randomised  
24 preoperatively (up to the day of surgery) or within the first six weeks postoperatively. Due to  
25 the nature of the study intervention, it is not possible to blind participants or treating  
26 physiotherapists to treatment allocation. However, receipt and handling of outcome data  
27 collection is blinded, thus data entry of returned postal questionnaires, data cleaning and  
28 interim statistical analyses are conducted without knowledge of treatment allocation  
29 (blinded).  
30  
31  
32  
33  
34  
35  
36  
37  
38  
39  
40  
41  
42  
43  
44  
45  
46  
47  
48  
49

### 50 **Interventions**

#### 51 **Control Arm: Usual Care**

52 All participants allocated to the usual care arm receive best practice usual care in the form of  
53 written leaflets containing information about exercises, recovery after surgery, and  
54  
55  
56  
57

1  
2  
3 treatments for breast cancer. During the pilot phase, different exercise information leaflets  
4 were reviewed and considered; we also consulted best practice guidance for written patient  
5 information materials (12). The most commonly used information leaflets were 'Exercises  
6 after Breast Cancer Surgery (BCC6)' and 'Your Operation and Recovery (BCC151)'  
7 published by Breast Cancer Care (BCC) (13). The BCC leaflets were selected because of  
8 content, style and clarity of presentation of information. These two information leaflets were  
9 given to all patients before surgery by breast care nurses, or other healthcare professionals,  
10 depending upon local practice.  
11  
12  
13  
14  
15  
16  
17  
18  
19

### 20 **Intervention Arm: PROSPER exercise programme**

21  
22 Participants randomised to the active intervention receive usual care leaflets in addition to  
23 the PROSPER intervention: a structured individualised exercise programme, comprising a  
24 minimum of three face-to-face and maximum of six sessions or contacts with a  
25 physiotherapist. As per Medical Research Council and TiDieR guidance, a more detailed  
26 description of the intervention development and final content has been described separately  
27 (submitted for publication). . We selected exercises and components based upon systematic  
28 reviews and clinical guidelines. A Cochrane review investigated the effectiveness of exercise  
29 interventions in preventing, minimising or improving upper-limb dysfunction due to breast  
30 cancer treatment (9) . This review included 24 trials and classified exercise type as active,  
31 active-assisted, passive range of movement, manual stretching, active stretching and  
32 resistance exercises. We considered these components in relation to evidence of  
33 effectiveness on shoulder range of movement and strength. This process was also  
34 augmented by eliciting opinions from clinical experts in the field of cancer rehabilitation and  
35 health psychology. The final PROSPER programme comprises specific exercises targeting  
36 shoulder range of motion and upper arm muscle strength, general physical activity, and  
37 behavioural adherence strategies.  
38  
39  
40  
41  
42  
43  
44  
45  
46  
47  
48  
49  
50  
51  
52  
53  
54  
55  
56  
57  
58  
59  
60



### **Overview of exercise intervention**

The intervention is predominantly delivered in physiotherapy outpatient departments. The first physiotherapy session is arranged seven to ten days after surgery, for assessment of shoulder ROM, postoperative pain, function, arm swelling, patients' goals and assessment of confidence to carry out prescribed exercises. Participants are prescribed an individually tailored home exercise programme and provided with guidance on rehabilitation, management of postoperative complications and returning to general physical activity and/or work. The intervention targets three movement directions using a combination of active-assisted ROM, active ROM and stretches: shoulder flexion (forward), shoulder abduction (side), and abduction with external rotation (open chest). The second appointment is between four to six weeks postoperatively to review progress and prescribe shoulder strengthening exercises. The programme is progressed by increasing exercise repetitions, sets and resistance. The third appointment is recommended for between 12 to 16 weeks postoperatively, for further progression to facilitate return to work, sport and hobbies. For women with later entry on the basis of postoperative radiotherapy, these timings will be slightly delayed, but the exercise programme should commence at the earliest opportunity, thus within six weeks of surgery.

As per development work with patient representatives, and to reflect the pragmatic trial design, three additional physiotherapy consultations are available on request. The timing and delivery of additional appointments, either via telephone or face-to-face, are flexible to account for on-going treatment, physiotherapist judgement and patient preference. Ideally the intervention will be completed within the first six months following surgery, but women can contact their physiotherapist for up to 12 months after randomisation. Thus any late treatment-related shoulder problems will be dealt with by the trial physiotherapist. Number and method of physiotherapy contacts will be closely monitored during the trial.

## Outcomes

Figure 1 and Table 3 present the study outcome measures and standardised assessment scales by assessment time point. Questionnaires are completed at baseline on recruitment, then at 6 weeks, 6 and 12 months after randomisation by post. The **primary outcome** is upper limb function at 12 months measured using the Disabilities of Arm, Shoulder and Hand (DASH) questionnaire (14). We considered other patient-reported outcome measures, including shoulder-specific scales, however selected the DASH because it captures symptoms and function of the upper limb rather than the shoulder joint *per se*. There is good evidence to suggest that women experience a variety of difficulties and restrictions after breast cancer treatment, affecting the hand, arm and shoulder. Functional impairment to the arm can affect performance of simple daily activities, including writing, opening or closing jars, lifting and/or holding shopping bags.

**Table 3. Outcome assessment**

| Outcome                     | Domain               | Scale / measure   | T <sub>0</sub><br>baseline | t <sub>1</sub><br>6 weeks | t <sub>2</sub><br>6 months | t <sub>3</sub><br>12 months |
|-----------------------------|----------------------|-------------------|----------------------------|---------------------------|----------------------------|-----------------------------|
| Primary                     | Function             | DASH              |                            |                           |                            | √                           |
| Secondary                   | Function             | DASH subscales    | √                          |                           | √                          | √                           |
|                             | Acute & chronic pain | FACT-B+4; NRS DN4 | √                          | √                         | √                          | √                           |
|                             | Neuropathic pain     |                   | √                          | √                         | √                          | √                           |
|                             | Complications        | SSI + self-report |                            | √                         | √                          | √                           |
|                             | Lymphoedema          | Self-report       | √                          | √                         | √                          | √                           |
|                             | Health-related QoL   | SF12 / EQ-5D-5L   | √                          |                           | √                          | √                           |
|                             | Resource use         | Self-report       |                            |                           | √                          | √                           |
| General activity & exercise | PASE items           | √                 | √                          | √                         | √                          |                             |

*DASH: Disabilities of Arm, Shoulder and Hand questionnaire; DN4: Doleur Neuropathique; SF12: Short Form-12; SSI: surgical site infection;*

*EQ-5D-5L: Euroqol; t: time point; QoL: Quality of Life; PASE: Physical Activity Scale for the Elderly*

1  
2  
3 The DASH is a 30-item patient-reported outcome measure designed to capture difficulty in  
4 performing various upper arm activities (14, 15). A single DASH score is generated, although  
5 psychometric assessment using discriminant content validation analysis has shown that the  
6 scale can be used to produce three health outcome sub-scores for impairment, activity  
7 limitation and participation restriction, as per the WHO International Classification of  
8 Functioning Disability and Health (ICF) taxonomy (16).  
9  
10  
11  
12  
13

14  
15  
16 **Secondary outcomes** include health-related quality of life (EuroQol EQ-5D-5L and Short-  
17 Form-12), DASH sub-scores, and surgical adverse events including pain (acute, chronic,  
18 neuropathic pain) surgical site infection and lymphoedema. A numerical rating scale (NRS)  
19 0-10 and Doleur Neuropathique Questionnaire (DN4) are used to collect pain intensity and  
20 pain character. The Functional Assessment of Cancer Therapy-Breast (FACT-B4) subscale  
21 captures arm tenderness, numbness, painful movement and stiffness. We added items to  
22 capture arm heaviness and swelling as self-report indicators of lymphoedema. Data on  
23 exercise/mobility are collected to allow comparisons in physical activity (selected items from  
24 the Physical Activity Scale for the Elderly (PASE)). The PASE was designed for use with  
25 older adults has been validated for use in clinical trials recruiting patients aged 55 years and  
26 older (17). Healthcare resource use is recorded for economic analyses.  
27  
28  
29  
30  
31  
32  
33  
34  
35  
36  
37  
38  
39

#### 40 **Sample Size**

41  
42 The PROSPER trial aims to recruit 350 patients, allocated in a 1:1 ratio. The sample size  
43 calculation is based on a Dutch trial of thirty women with breast cancer, randomised to  
44 physiotherapy over a three month period, reporting a between group difference of 7 points  
45 on the DASH at 6 months (18). At 80% power and  $p < 0.05$ , this yields a target of 242  
46 participants in total. Accounting for therapist effects, an intracluster coefficient (ICC) of 0.01  
47 (yielding a design effect of 1.05), gives a target of 256 participants. The ICC estimate is  
48 based on our previous experience of exercise interventions in a range of musculoskeletal  
49 trials. We anticipate loss to follow up of less than 10% based on our previous clinical trials  
50  
51  
52  
53  
54  
55  
56  
57  
58  
59  
60

1  
2  
3 however, have inflated this to 25% to cover the possibility that numbers lost to follow up are  
4 greater than anticipated e.g. due to ongoing cancer treatment.  
5  
6  
7

8  
9 The study is powered to detect a 7 point difference on the DASH. Studies of rheumatological  
10 and orthopaedic populations have suggested that the minimally clinically important  
11 difference (MCID) for the DASH is 10, and that the between group difference for trials should  
12 be set at 10 (19). However, this fails to account for many of the eventualities that occur in  
13 pragmatic trials, notably that there is not a 'no treatment' control arm, and therefore that  
14 some of the control group may be exposed by serendipity to an intervention of similar  
15 intensity, particularly in a high risk population.  
16  
17  
18  
19  
20  
21  
22  
23

#### 24 **Internal pilot study**

25  
26 A six-month internal pilot phase was conducted at three breast cancer units (Coventry,  
27 Oxford and Wolverhampton) to evaluate processes for patient identification, eligibility and  
28 refinement of recruitment estimates. The intended sample size for the internal pilot study  
29 was 30 participants, approximately 10% of the full sample. Acceptability of the PROSPER  
30 intervention was explored through qualitative research involving audio-recorded individual  
31 interviews with seven participants. Changes were made to patient-facing materials and to  
32 exercise intervention materials. Easy to use pocket-sized laminated cards with details of  
33 inclusion/exclusion criteria and shoulder screening criteria were produced for recruitment  
34 staff. Additional telephone or face-to-face appointments were added to the exercise  
35 intervention to allow for flexibility during ongoing cancer treatment. Data from the pilot phase  
36 helped to refine recruitment and trial processes. Patients recruited to the pilot phase  
37 continue with the follow-up schedule and will be retained in the full trial analysis. The pilot  
38 study was completed as planned and the funder approved progression to full trial.  
39  
40  
41  
42  
43  
44  
45  
46  
47  
48  
49  
50  
51  
52  
53  
54  
55  
56  
57  
58  
59  
60

## Data analysis

Statistical analysis will be intention-to-treat and will comply with the CONSORT guidelines. The primary outcome data will be summarised using mean, standard deviation, median and range values. The clustering effect will be assessed prior to analysis of the data. In the presence of a clustering effect, the primary outcome will be analysed using multi-level linear regression models. If there is negligible clustering effect, it will be analysed using ordinary linear regression models. In each case, the mean change from baseline (to 6 and 12 months) will be summarised for each of the treatment arms and differences between the interventions using unadjusted and adjusted (for age, type of surgery and radiotherapy) estimates. These mean changes and their 95% confidence intervals will be plotted graphically so that change can be assessed over the course of the study. Continuous secondary outcomes will be assessed in a similar way to the primary outcome. Categorical data will be analysed using random effect/ordinary logistic models, depending on the presence of a clustering effect.

A DASH score cannot be computed if there are more than three missing items. As a sensitivity analysis, the impact of missing data will be assessed using multiple imputation. The impact of non-compliance with the intervention will be examined using the complier average causal effect (CACE) analysis (20, 21). We have reviewed definitions of compliance for CACE analyses used in other therapy trials (22, 23). Complete compliance with the PROSPER intervention is defined as having three or more contacts with the PROSPER therapist; an additional analysis will be undertaken to explore partial compliance, defined as less than three sessions. Analyses and template tables will be reported in a detailed statistical analysis plan for review and approval by the DMC, prior to final statistical analysis of the data. Planned sensitivity analyses include: a) the impact of low/high recruitment centres on clustering effect; and b) assessment of differences between date of randomisation and date of surgery across groups, as surgical trials vary in relation to timing of follow-up.

### *Economic Evaluation*

The primary economic evaluation will be conducted from the NHS and personal social services (PSS) perspective (24) using the intention-to-treat approach (25). Data will be collected on the health and social service resources used in the treatment of each trial participant from randomisation to 12 months post-randomisation. Primary research methods will be used to estimate the costs of delivering the physiotherapy-led exercise programme, including development and training of accredited providers, the cost of delivering the individual sessions and participant monitoring activities. Broader resource utilisation will be captured through three main sources: (i) clinical data extraction forms; (ii) patient postal questionnaires at 6 months and 12 months post-randomisation; and if feasible within the trial timeline, (iii) routine health data sources from NHS Digital. Current UK unit costs, will be applied to each resource item to estimate costs in each trial arm. Health-related quality of life will be measured at baseline and at 6 and 12 months post-randomisation using the generic EQ-5D-5L and SF-12 measures; national tariff sets will be used to generate quality-adjusted life-years (QALYs) (26-30).

An incremental cost-effectiveness analysis, expressed in terms of incremental cost per QALY gained, will be performed. Detailed methods of analysis will be pre-specified within a health economics analysis plan approved by the trial team prior to analysis to ensure appropriate methods are used. Results will be presented using incremental cost-effectiveness ratios (ICERs) and cost-effectiveness acceptability curves generated via the net-benefit framework. A series of sensitivity analyses will be undertaken to explore the implications of uncertainty on the ICERs and to consider the broader issue of the generalisability of the study results. Due to the known limitations of within-trial economic evaluations (31), a decision-analytical model may be constructed to examine the longer term costs and outcomes beyond the end of the trial. Costs and outcomes beyond the first year

1  
2  
3 will be discounted to present values (24) and probabilistic sensitivity analyses will be  
4  
5 undertaken to explore the impact of uncertainty on the ICERs.  
6  
7

### 8 **Qualitative sub-study**

9  
10 An embedded qualitative study will be undertaken to gain insight into the experiences of  
11  
12 women participating in trial interventions. We will explore the acceptability of the exercise  
13  
14 programme and compare and contrast experiences with women allocated to the control  
15  
16 intervention.  
17

#### 18 *Design of sub-study*

19  
20 In-depth, semi-structured interviews will be conducted and audio-recorded. Interview topic  
21  
22 guides will be used to ensure similar areas are covered in each interview. Participants  
23  
24 consenting to the main trial are asked to indicate willingness to take part in a future interview  
25  
26 to explore postoperative experiences. A total of twenty interviews are planned, with ten  
27  
28 women from each intervention arm. Purposive sampling will be used, striving for a mix of  
29  
30 geographical location, age, employment status, socio-economic background and ethnicity.  
31  
32  
33  
34  
35

#### 36 *Analysis*

37  
38 Interviews will be recorded, transcribed and analysed using a Framework Approach. A  
39  
40 thematic framework will be developed using pre-determined themes plus new themes raised  
41  
42 by participants. The framework will be applied to the interview text and coded data will be  
43  
44 arranged on a chart according to each theme identified. Themes will be examined with a  
45  
46 view to providing explanations of the participants' experiences and understandings.  
47  
48  
49

### 50 **Data security and management**

51  
52 Participant data is stored on a secure database in accordance with the Data Protection Act  
53  
54 (1998). A unique trial identification number is used on all participant communication. Clinical  
55  
56 and patient forms are being checked for completeness and congruity before data entry onto  
57



1  
2  
3 the PROSPER trial database. Data will undergo additional checks to ensure consistency  
4 between data submitted and original paper forms. Trial documentation and data will be  
5 archived for at least ten years after completion of the trial in accordance with WCTU  
6 standard operating procedures.  
7  
8  
9

### 10 11 12 **Trial monitoring**

13  
14 The Trial Management Group (TMG) will oversee all aspects of design, delivery, quality  
15 assurance and data analysis. A Trial Steering Committee (TSC), with independent  
16 Chairperson, will monitor the trial at least once per year. An independent DMC will review  
17 trial progress, recruitment, protocol compliance and interim analysis of outcomes, annually  
18 or more frequently as requested. Recruitment data from the internal pilot study were  
19 reviewed by independent committees and by the funder to approve the launch of the main  
20 trial.  
21  
22  
23  
24  
25  
26  
27  
28  
29

### 30 31 **Adverse event management**

32 A safety reporting protocol has been developed for related and unexpected serious adverse  
33 events (SAEs) and directly attributable adverse events (AEs). An AE is defined as any  
34 untoward medical occurrence in a subject which does not necessarily have a causal  
35 relationship with the intervention. Any adverse event that occurs whilst undertaking  
36 PROSPER exercises, either during an appointment, or whilst exercising unsupervised at  
37 home, require reporting to the trial team. The trial Chief Investigator, with input from the  
38 WCTU Quality Assurance team, determine whether AEs require reporting to the trial  
39 sponsor, DMC and Ethics Committee, in accordance with the full safety reporting protocol.  
40  
41  
42  
43  
44  
45  
46  
47  
48  
49  
50

### 51 52 **Research ethics approval**

53  
54 Ethical approval was granted from the NHS National Research Ethics Service (NRES)  
55 Committee West Midlands (Solihull) (15/WM/0224) on 20th July 2015. Site-specific  
56  
57

1  
2  
3 approvals have been obtained from NHS Research, Development and Innovation  
4 departments.  
5  
6  
7

### 8 9 **Dissemination policy**

10 The study team are committed to full disclosure of the results of the trial. Findings will be  
11 reported in accordance with CONSORT guidelines (32) and we aim to publish in high impact  
12 journals. Our patient representatives will assist with dissemination of study results through  
13 INVOLVE, other cancer patient groups and organisations including  
14 [www.independentcancerpatientsvoice.org.uk](http://www.independentcancerpatientsvoice.org.uk). The funder will take no role in the analysis or  
15 interpretation of trial results.  
16  
17  
18  
19  
20  
21  
22  
23

### 24 25 **Discussion**

26 The PROSPER trial will be the largest UK RCT examining the effectiveness of an early,  
27 supervised exercise and behavioural support intervention for women at risk of developing  
28 shoulder problems after breast cancer surgery. Previous trials in this field have been  
29 criticised for being of poor methodological quality and lacking in important outcome  
30 measures, such as patient-reported shoulder function and health-related quality of life.  
31 Another challenge encountered in previous clinical trials of this population is low participant  
32 recruitment, partly due to the short time frame between diagnosis and surgery but also  
33 perhaps compounded by reluctance to undertake active exercise when faced with a  
34 distressing and potentially life-threatening cancer diagnosis. PROSPER aims to recruit 350  
35 newly diagnosed breast cancer patients to provide empirical data on whether a  
36 physiotherapy-led exercise programme is effective for reducing shoulder disability, when  
37 delivered in a pragmatic NHS clinical setting. The design and development of this complex  
38 intervention was underpinned by multiple stages of work, in line with MRC guidance on the  
39 development of complex interventions. A full description of the content of the PROSPER  
40 exercise intervention has been submitted elsewhere for publication.  
41  
42  
43  
44  
45  
46  
47  
48  
49  
50  
51  
52  
53  
54  
55  
56  
57  
58  
59  
60

1  
2  
3 **Figure 1** Study outcome measures and assessment time points

4 **Figure 2** Trial flow diagram

5  
6  
7  
8 **Acknowledgements**

9  
10 We extend very grateful thanks to all the trial participants. We are also grateful to all the  
11 physiotherapy staff, surgical oncology teams, breast cancer nurses and research  
12 departments collaborating on this study.  
13  
14

15  
16 **Collaborators**

17  
18 PROSPER Study Group: Chief Investigator: Professor Julie Bruce. Co-investigators (Grant  
19 holders): Professor Sarah E Lamb, Dr Esther Williamson, Dr Ranjit Lall, Professor Stavros  
20 Petrou, Mr Alastair M Thompson, Dr John Williams and Dr Catherine Harkin (deceased).  
21  
22

23  
24 Trial Coordination/Administration: Mrs Emma J Withers, Mrs Lauren Betteley, Mr Craig  
25 Turner, Mrs Loraine Chowdhury.  
26  
27

28  
29 Senior Project Managers: Mrs Susie Hennings, Mrs Helen Higgins.

30  
31 Research Fellows/Associates: Dr Helen Richmond, Mrs Clare Lait (Physiotherapist), Dr  
32 Sophie Rees (Qualitative), Mr Pankaj Mistry (Medical Statistics), Dr Alastair Canaway  
33 (Health Economics).  
34  
35

36  
37 Patient representatives: Dr Catherine Harkin (Deceased), Mrs Marie van Laar, Mrs Lyn  
38 Ankcorn.  
39

40  
41 Surgical Leads: Miss Abigail Tomlins, Miss Raghavan Vidya, Ms Pankaj G Roy, Miss Kat  
42 McEvoy, Miss Rachel Soulsby.  
43

44  
45 Intervention development: Mrs Clare Lait, Dr Esther Williamson, Dr Cynthia Srikesavan, Mrs  
46 Jane Moser, Dr Meredith Newman, Dr Sophie Rees, Mrs Lauren Betteley, Dr Helen  
47 Richmond, Dr Beth Fordham, Professor Sarah E Lamb and Professor Julie Bruce.  
48  
49

50  
51 Data Programming team: Mr Ade Willis, Mr Henry Adjei.

52  
53 Quality Assurance: Ms Claire Daffern.  
54  
55  
56  
57  
58  
59  
60

1  
2  
3 **Contributors:** JB obtained study funding with support from SEL, EW, RL, SP and AMT. JB,  
4 SEL, EW, CL, RL, AMT, LB, SR and SP participated in the design of the study. EJW and LB  
5 coordinate study administration, acquisition of trial data and administrative support (CT/LC).  
6 PM will undertake statistical analysis, under direction of RL, senior trial statistician. AC is  
7 responsible for health economic analysis, supported by SP, senior health economist. JB and  
8 HR drafted the manuscript. All authors critically revised the manuscript for intellectual  
9 content and approved the final manuscript. This trial protocol is published on behalf of the  
10 PROSPER Study Group.  
11  
12  
13  
14  
15  
16  
17  
18  
19  
20

### 21 **Funding**

22 The PROSPER trial is funded by the National Institute of Health Research Technology  
23 Assessment Programme (NIHR HTA), project number 13/84/10. The views expressed in this  
24 publication are those of the authors and not necessarily those of the NIHR or Department of  
25 Health. This project benefited from facilities funded by Birmingham Science City  
26 Translational Medicine Clinical Research and Infrastructure Trials Platform, with support  
27 from Advantage West Midlands (AWM). The trial sponsor is the University of Warwick and  
28 University Hospitals Coventry and Warwickshire NHS Trust. SL and EW are supported by  
29 funding from the National Institute for Health Research (NIHR) Collaboration for Leadership  
30 in Applied Health Research and Care Oxford at Oxford Health NHS Foundation Trust, and  
31 the NIHR Biomedical Research Unit, Oxford. The views expressed are those of the author(s)  
32 and not necessarily those of the NHS, the NIHR or the Department of Health.  
33  
34  
35  
36  
37  
38  
39  
40  
41  
42  
43  
44  
45  
46

### 47 **Trial Registration:**

48 International Standard Randomised Controlled Trial Number: ISRCTN 35358984.  
49  
50  
51

### 52 **Competing interests**

53 One author provides private physiotherapy to cancer patients (CL).  
54  
55  
56  
57  
58  
59  
60

### **Data sharing statement**

The trial statisticians and iDMC will have access to the dataset for the analysis of trial outcomes. The CI will have access to the data and take full responsibility for the analysis and publication of results. Once the main analyses have been undertaken, data will be available to other investigators subject to approval of data analysis plans by the steering committee and compliance with the University of Warwick Standard Operating Procedures on Data Management and Sharing. We will comply with Data Sharing Policies that may be instituted by the Funder (NIHR) during the lifetime of the project. The full PROSPER intervention manual and related materials will be available for wider access on completion of the main trial, according to funder and institutional repository requirements.

**Data Monitoring Committee:** Professor Malcolm Reed (Chair), Dr Rhian Gabe, Dr Matthew Maddocks.

**Trial Steering Committee:** Professor Steven Duffy (Chair), Dr Anna Kirby, Dr Karen Robb. We dedicate this article to Professor Adele Frances (Deceased) who served on the PROSPER TSC from 2015-2016.

## References

1. CRUK. *Cancer Research UK: Breast Cancer Survival Statistics* [cited 2014]. Available from: <http://www.cancerresearchuk.org/cancer-info/cancerstats/types/breast/survival/>.
2. Mejdahl MK, Andersen KG, Gärtner R, Kroman N, Kehlet H. Persistent pain and sensory disturbances after treatment for breast cancer: six year nationwide follow-up study. *BMJ*. 2013;346:f1865.
3. McNeely ML, Binkley JM, Pusic AL, Campbell KL, Gabram S, Soballe PW. A prospective model of care for breast cancer rehabilitation: postoperative and postreconstructive issues. *Cancer*. 2012;118(8 Suppl):2226-36.
4. Lee TS, Kilbreath SL, Refshauge KM, Herbert RD, Beith JM. Prognosis of the upper limb following surgery and radiation for breast cancer. *Breast Cancer Res Treat*. 2008;110(1):19-37.
5. Bruce J, Thornton AJ, Powell R, Johnston M, Wells M, Heys SD, et al. Psychological, surgical, and sociodemographic predictors of pain outcomes after breast cancer surgery: a population-based cohort study. *Pain*. 2014;155(2):232-43.
6. Kootstra JJ, Dijkstra PU, Rietman H, de Vries J, Baas P, Geertzen JH, et al. A longitudinal study of shoulder and arm morbidity in breast cancer survivors 7 years after sentinel lymph node biopsy or axillary lymph node dissection. *Breast Cancer Res Treat*. 2013;139(1):125-34.
7. Meretoja TJ, Andersen KG, Bruce J, Haasio L, Sipila R, Scott NW, et al. Clinical Prediction Model and Tool for Assessing Risk of Persistent Pain After Breast Cancer Surgery. *J Clin Oncol*. 2017;35(15):1660-7.
8. DiSipio T, Rye S, Newman B, Hayes S. Incidence of unilateral arm lymphoedema after breast cancer: a systematic review and meta-analysis. *The Lancet Oncology*. 2013;14(6):500-15.

- 1  
2  
3 9. McNeely ML, Campbell K, Ospina M, Rowe BH, Dabbs K, Klassen TP, et al.  
4 Exercise interventions for upper-limb dysfunction due to breast cancer treatment. The  
5 Cochrane database of systematic reviews. 2010(6):CD005211.  
6
- 7  
8 10. Todd J, Scally A, Dodwell D, Horgan K, Topping A. A randomised controlled trial of  
9 two programmes of shoulder exercise following axillary node dissection for invasive breast  
10 cancer. *Physiotherapy*. 2008;94(4):265-73.  
11
- 12  
13 11. Chan A-W, Tetzlaff JM, Gøtzsche PC, Altman DG, Mann H, Berlin JA, et al. SPIRIT  
14 2013 explanation and elaboration: guidance for protocols of clinical trials. *Bmj*.  
15 2013;346:e7586.  
16
- 17  
18 12. Health Do, cartographer Toolkit for producing patient information London The  
19 Department of Health; 2003.  
20
- 21  
22 13. BCC. Breast Cancer Campaign [Available from:  
23 <http://www.breastcancercare.org.uk/>.  
24
- 25  
26 14. Hudak PL, Amadio PC, Bombardier C. Development of an upper extremity outcome  
27 measure: the DASH (disabilities of the arm, shoulder and hand) [corrected]. The Upper  
28 Extremity Collaborative Group (UECG). *Am J Ind Med*. 1996;29(6):602-8.  
29
- 30  
31 15. Harrington S, Michener LA, Kendig T, Miale S, George SZ. Patient-reported upper  
32 extremity outcome measures used in breast cancer survivors: a systematic review. *Archives*  
33 *of physical medicine and rehabilitation*. 2014;95(1):153-62.  
34
- 35  
36 16. Dixon D, Johnston M, McQueen M, Court-Brown C. The Disabilities of the Arm,  
37 Shoulder and Hand Questionnaire (DASH) can measure the impairment, activity limitations  
38 and participation restriction constructs from the International Classification of Functioning,  
39 Disability and Health (ICF). *BMC musculoskeletal disorders*. 2008;9:114.  
40
- 41  
42 17. Washburn RA, McAuley E, Katula J, Mihalko SL, Boileau RA. The physical activity  
43 scale for the elderly (PASE): evidence for validity. *Journal of clinical epidemiology*.  
44 1999;52(7):643-51.  
45  
46  
47  
48  
49  
50  
51  
52  
53  
54  
55  
56  
57  
58  
59  
60

- 1  
2  
3 18. Beurskens CH, van Uden CJ, Strobbe LJ, Oostendorp RA, Wobbes T. The efficacy  
4 of physiotherapy upon shoulder function following axillary dissection in breast cancer, a  
5 randomized controlled study. *BMC cancer*. 2007;7:166.  
6  
7
- 8 19. Sorensen AA, Howard D, Tan WH, Ketchersid J, Calfee RP. Minimal clinically  
9 important differences of 3 patient-rated outcomes instruments. *The Journal of hand surgery*.  
10 2013;38(4):641-9.  
11  
12
- 13 20. Dunn G, Maracy M, Tomenson B. Estimating treatment effects from randomized  
14 clinical trials with noncompliance and loss to follow-up: the role of instrumental variable  
15 methods. *Statistical methods in medical research*. 2005;14(4):369-95.  
16  
17
- 18 21. Perneger TV, Burnand B. A simple imputation algorithm reduced missing data in SF-  
19 12 health surveys. *Journal of clinical epidemiology*. 2005;58(2):142-9.  
20  
21
- 22 22. Knox CR, Lall R, Hansen Z, Lamb SE. Treatment compliance and effectiveness of a  
23 cognitive behavioural intervention for low back pain: a complier average causal effect  
24 approach to the BeST data set. *BMC musculoskeletal disorders*. 2014;15:17.  
25  
26
- 27 23. Williams MA, Williamson EM, Heine PJ, Nichols V, Glover MJ, Dritsaki M, et al.  
28 Strengthening And stretching for Rheumatoid Arthritis of the Hand (SARAH). A randomised  
29 controlled trial and economic evaluation. *Health Technol Assess*. 2015;19(19):1-222.  
30  
31
- 32 24. NICE. *Guide to the Methods of Technology Appraisal 2013* [Available from:  
33 <http://publications.nice.org.uk/guide-to-the-methods-of-technology-appraisal-2013-pmg9>.  
34  
35
- 36 25. Hollis S, Campbell F. What is meant by intention to treat analysis? Survey of  
37 published randomised controlled trials. *Bmj*. 1999;319(7211):670-4.  
38  
39
- 40 26. Dolan P. Modeling valuations for EuroQol health states. *Medical care*.  
41 1997;35(11):1095-108.  
42  
43
- 44 27. van Hout B, Janssen MF, Feng YS, Kohlmann T, Busschbach J, Golicki D, et al.  
45 Interim scoring for the EQ-5D-5L: mapping the EQ-5D-5L to EQ-5D-3L value sets. *Value in*  
46 *health : the journal of the International Society for Pharmacoeconomics and Outcomes*  
47 *Research*. 2012;15(5):708-15.  
48  
49  
50  
51  
52  
53  
54  
55  
56  
57  
58  
59  
60



- 1  
2  
3 28. Herdman M, Gudex C, Lloyd A, Janssen M, Kind P, Parkin D, et al. Development and  
4 preliminary testing of the new five-level version of EQ-5D (EQ-5D-5L). *Quality of life*  
5 *research : an international journal of quality of life aspects of treatment, care and*  
6 *rehabilitation*. 2011;20(10):1727-36.  
7  
8  
9  
10 29. Brazier J, Roberts J, Deverill M. The estimation of a preference-based measure of  
11 health from the SF-36. *Journal of health economics*. 2002;21(2):271-92.  
12  
13 30. Devlin N, Shah K, Feng Y, Mulhern B, van Hout B. Valuing health-related quality of  
14 life: an EQ-5D-5L value set for England. 2016.  
15  
16  
17 31. Sculpher MJ, Claxton K, Drummond M, McCabe C. Whither trial-based economic  
18 evaluation for health care decision making? *Health economics*. 2006;15(7):677-87.  
19  
20 32. Moher D, Schulz KF, Altman DG. The CONSORT statement: revised  
21 recommendations for improving the quality of reports of parallel-group randomised trials.  
22 *Lancet*. 2001;357(9263):1191-4.  
23  
24  
25  
26  
27  
28  
29  
30  
31  
32  
33  
34  
35  
36  
37  
38  
39  
40  
41  
42  
43  
44  
45  
46  
47  
48  
49  
50  
51  
52  
53  
54  
55  
56  
57  
58  
59  
60

Figure 1. Study outcome measures and assessment time points

| Time point                | Study period |                  |                  |                   |                    |
|---------------------------|--------------|------------------|------------------|-------------------|--------------------|
|                           | Enrolment    | Allocation       | Post-allocation  |                   |                    |
|                           | $-t_1$       | $0$              | $t_1$<br>6 weeks | $t_2$<br>6 months | $t_3$<br>12 months |
| Enrolment:                |              |                  |                  |                   |                    |
| Eligibility screen        | √            |                  |                  |                   |                    |
| Informed consent          | √            |                  |                  |                   |                    |
| Randomisation             | 350          | √                |                  |                   |                    |
| Interventions             |              |                  |                  |                   |                    |
| Usual Care (UC)           | 175          | All participants | ←→               |                   |                    |
| UC + PROSPER intervention | 175          |                  | ←→               | ←→                | →                  |

Figure 1 Study outcome measures and assessment time points

87x46mm (300 x 300 DPI)

Figure 2. Trial flow diagram



Figure 2 Trial flow diagram

50x65mm (300 x 300 DPI)



SPIRIT 2013 Checklist: Recommended items to address in a clinical trial protocol and related documents\*

| Section/item                      | Item No | Description                                                                                                                                                                                                                                                                              | Addressed on page number |
|-----------------------------------|---------|------------------------------------------------------------------------------------------------------------------------------------------------------------------------------------------------------------------------------------------------------------------------------------------|--------------------------|
| <b>Administrative information</b> |         |                                                                                                                                                                                                                                                                                          |                          |
| Title                             | 1       | Descriptive title identifying the study design, population, interventions, and, if applicable, trial acronym                                                                                                                                                                             | 1                        |
| Trial registration                | 2a      | Trial identifier and registry name. If not yet registered, name of intended registry                                                                                                                                                                                                     | 4                        |
|                                   | 2b      | All items from the World Health Organization Trial Registration Data Set                                                                                                                                                                                                                 | Table 1                  |
| Protocol version                  | 3       | Date and version identifier                                                                                                                                                                                                                                                              | 3 & 22                   |
| Funding                           | 4       | Sources and types of financial, material, and other support                                                                                                                                                                                                                              | 25 & Table 1             |
| Roles and responsibilities        | 5a      | Names, affiliations, and roles of protocol contributors                                                                                                                                                                                                                                  | 24-25                    |
|                                   | 5b      | Name and contact information for the trial sponsor                                                                                                                                                                                                                                       | Table 1                  |
|                                   | 5c      | Role of study sponsor and funders, if any, in study design; collection, management, analysis, and interpretation of data; writing of the report; and the decision to submit the report for publication, including whether they will have ultimate authority over any of these activities | 25-6                     |
|                                   | 5d      | Composition, roles, and responsibilities of the coordinating centre, steering committee, endpoint adjudication committee, data management team, and other individuals or groups overseeing the trial, if applicable (see Item 21a for data monitoring committee)                         | 24                       |

## Introduction

|                          |    |                                                                                                                                                                                                           |         |
|--------------------------|----|-----------------------------------------------------------------------------------------------------------------------------------------------------------------------------------------------------------|---------|
| Background and rationale | 6a | Description of research question and justification for undertaking the trial, including summary of relevant studies (published and unpublished) examining benefits and harms for each intervention        | 5 - 7   |
|                          | 6b | Explanation for choice of comparators                                                                                                                                                                     | 10 – 12 |
| Objectives               | 7  | Specific objectives or hypotheses                                                                                                                                                                         | 8       |
| Trial design             | 8  | Description of trial design including type of trial (eg, parallel group, crossover, factorial, single group), allocation ratio, and framework (eg, superiority, equivalence, noninferiority, exploratory) | 8 - 9   |

## Methods: Participants, interventions, and outcomes

|                      |     |                                                                                                                                                                                                                                                                                                                                                                                |                                      |
|----------------------|-----|--------------------------------------------------------------------------------------------------------------------------------------------------------------------------------------------------------------------------------------------------------------------------------------------------------------------------------------------------------------------------------|--------------------------------------|
| Study setting        | 9   | Description of study settings (eg, community clinic, academic hospital) and list of countries where data will be collected. Reference to where list of study sites can be obtained                                                                                                                                                                                             | 8                                    |
| Eligibility criteria | 10  | Inclusion and exclusion criteria for participants. If applicable, eligibility criteria for study centres and individuals who will perform the interventions (eg, surgeons, psychotherapists)                                                                                                                                                                                   | 8 – 9                                |
| Interventions        | 11a | Interventions for each group with sufficient detail to allow replication, including how and when they will be administered                                                                                                                                                                                                                                                     | 10-12 + separate intervention papers |
|                      | 11b | Criteria for discontinuing or modifying allocated interventions for a given trial participant (eg, drug dose change in response to harms, participant request, or improving/worsening disease)                                                                                                                                                                                 | 22                                   |
|                      | 11c | Strategies to improve adherence to intervention protocols, and any procedures for monitoring adherence (eg, drug tablet return, laboratory tests)                                                                                                                                                                                                                              | 12                                   |
|                      | 11d | Relevant concomitant care and interventions that are permitted or prohibited during the trial                                                                                                                                                                                                                                                                                  | 12                                   |
| Outcomes             | 12  | Primary, secondary, and other outcomes, including the specific measurement variable (eg, systolic blood pressure), analysis metric (eg, change from baseline, final value, time to event), method of aggregation (eg, median, proportion), and time point for each outcome. Explanation of the clinical relevance of chosen efficacy and harm outcomes is strongly recommended | Table 2                              |
| Participant timeline | 13  | Time schedule of enrolment, interventions (including any run-ins and washouts), assessments, and visits for participants. A schematic diagram is highly recommended (see Figure)                                                                                                                                                                                               | Figure 1                             |

1  
2  
3  
4  
5  
6  
7  
8  
9  
10  
11  
12  
13  
14  
15  
16  
17  
18  
19  
20  
21  
22  
23  
24  
25  
26  
27  
28  
29  
30  
31  
32  
33  
34  
35  
36  
37  
38  
39  
40  
41  
42  
43  
44  
45  
46  
47

Sample size 14 Estimated number of participants needed to achieve study objectives and how it was determined, including clinical and statistical assumptions supporting any sample size calculations 16

Recruitment 15 Strategies for achieving adequate participant enrolment to reach target sample size 9

**Methods: Assignment of interventions (for controlled trials)**

Allocation:

Sequence generation 16a Method of generating the allocation sequence (eg, computer-generated random numbers), and list of any factors for stratification. To reduce predictability of a random sequence, details of any planned restriction (eg, blocking) should be provided in a separate document that is unavailable to those who enrol participants or assign interventions 9

Allocation concealment mechanism 16b Mechanism of implementing the allocation sequence (eg, central telephone; sequentially numbered, opaque, sealed envelopes), describing any steps to conceal the sequence until interventions are assigned 9

Implementation 16c Who will generate the allocation sequence, who will enrol participants, and who will assign participants to interventions 10

Blinding (masking) 17a Who will be blinded after assignment to interventions (eg, trial participants, care providers, outcome assessors, data analysts), and how 10

17b If blinded, circumstances under which unblinding is permissible, and procedure for revealing a participant's allocated intervention during the trial 10

**Methods: Data collection, management, and analysis**

Data collection methods 18a Plans for assessment and collection of outcome, baseline, and other trial data, including any related processes to promote data quality (eg, duplicate measurements, training of assessors) and a description of study instruments (eg, questionnaires, laboratory tests) along with their reliability and validity, if known. Reference to where data collection forms can be found, if not in the protocol 11 & Table 2

18b Plans to promote participant retention and complete follow-up, including list of any outcome data to be collected for participants who discontinue or deviate from intervention protocols 11 & 14

|    |                                 |     |                                                                                                                                                                                                                                                                                                                                       |                                       |
|----|---------------------------------|-----|---------------------------------------------------------------------------------------------------------------------------------------------------------------------------------------------------------------------------------------------------------------------------------------------------------------------------------------|---------------------------------------|
| 1  |                                 |     |                                                                                                                                                                                                                                                                                                                                       |                                       |
| 2  |                                 |     |                                                                                                                                                                                                                                                                                                                                       |                                       |
| 3  | Data management                 | 19  | Plans for data entry, coding, security, and storage, including any related processes to promote data quality (eg, double data entry; range checks for data values). Reference to where details of data management procedures can be found, if not in the protocol                                                                     | 20                                    |
| 4  |                                 |     |                                                                                                                                                                                                                                                                                                                                       |                                       |
| 5  |                                 |     |                                                                                                                                                                                                                                                                                                                                       |                                       |
| 6  |                                 |     |                                                                                                                                                                                                                                                                                                                                       |                                       |
| 7  | Statistical methods             | 20a | Statistical methods for analysing primary and secondary outcomes. Reference to where other details of the statistical analysis plan can be found, if not in the protocol                                                                                                                                                              | 17-20                                 |
| 8  |                                 |     |                                                                                                                                                                                                                                                                                                                                       |                                       |
| 9  |                                 |     |                                                                                                                                                                                                                                                                                                                                       |                                       |
| 10 |                                 | 20b | Methods for any additional analyses (eg, subgroup and adjusted analyses)                                                                                                                                                                                                                                                              | 17-20                                 |
| 11 |                                 |     |                                                                                                                                                                                                                                                                                                                                       |                                       |
| 12 |                                 | 20c | Definition of analysis population relating to protocol non-adherence (eg, as randomised analysis), and any statistical methods to handle missing data (eg, multiple imputation)                                                                                                                                                       | 18-20                                 |
| 13 |                                 |     |                                                                                                                                                                                                                                                                                                                                       |                                       |
| 14 |                                 |     |                                                                                                                                                                                                                                                                                                                                       |                                       |
| 15 | <b>Methods: Monitoring</b>      |     |                                                                                                                                                                                                                                                                                                                                       |                                       |
| 16 |                                 |     |                                                                                                                                                                                                                                                                                                                                       |                                       |
| 17 | Data monitoring                 | 21a | Composition of data monitoring committee (DMC); summary of its role and reporting structure; statement of whether it is independent from the sponsor and competing interests; and reference to where further details about its charter can be found, if not in the protocol. Alternatively, an explanation of why a DMC is not needed | 22                                    |
| 18 |                                 |     |                                                                                                                                                                                                                                                                                                                                       |                                       |
| 19 |                                 |     |                                                                                                                                                                                                                                                                                                                                       |                                       |
| 20 |                                 |     |                                                                                                                                                                                                                                                                                                                                       |                                       |
| 21 |                                 |     |                                                                                                                                                                                                                                                                                                                                       |                                       |
| 22 |                                 | 21b | Description of any interim analyses and stopping guidelines, including who will have access to these interim results and make the final decision to terminate the trial                                                                                                                                                               | 20                                    |
| 23 |                                 |     |                                                                                                                                                                                                                                                                                                                                       |                                       |
| 24 |                                 |     |                                                                                                                                                                                                                                                                                                                                       |                                       |
| 25 | Harms                           | 22  | Plans for collecting, assessing, reporting, and managing solicited and spontaneously reported adverse events and other unintended effects of trial interventions or trial conduct                                                                                                                                                     | 22                                    |
| 26 |                                 |     |                                                                                                                                                                                                                                                                                                                                       |                                       |
| 27 |                                 |     |                                                                                                                                                                                                                                                                                                                                       |                                       |
| 28 | Auditing                        | 23  | Frequency and procedures for auditing trial conduct, if any, and whether the process will be independent from investigators and the sponsor                                                                                                                                                                                           | 12 & described in intervention papers |
| 29 |                                 |     |                                                                                                                                                                                                                                                                                                                                       |                                       |
| 30 |                                 |     |                                                                                                                                                                                                                                                                                                                                       |                                       |
| 31 |                                 |     |                                                                                                                                                                                                                                                                                                                                       |                                       |
| 32 | <b>Ethics and dissemination</b> |     |                                                                                                                                                                                                                                                                                                                                       |                                       |
| 33 |                                 |     |                                                                                                                                                                                                                                                                                                                                       |                                       |
| 34 | Research ethics approval        | 24  | Plans for seeking research ethics committee/institutional review board (REC/IRB) approval                                                                                                                                                                                                                                             | 22                                    |
| 35 |                                 |     |                                                                                                                                                                                                                                                                                                                                       |                                       |
| 36 |                                 |     |                                                                                                                                                                                                                                                                                                                                       |                                       |
| 37 | Protocol amendments             | 25  | Plans for communicating important protocol modifications (eg, changes to eligibility criteria, outcomes, analyses) to relevant parties (eg, investigators, REC/IRBs, trial participants, trial registries, journals, regulators)                                                                                                      | 4                                     |
| 38 |                                 |     |                                                                                                                                                                                                                                                                                                                                       |                                       |
| 39 |                                 |     |                                                                                                                                                                                                                                                                                                                                       |                                       |
| 40 |                                 |     |                                                                                                                                                                                                                                                                                                                                       |                                       |
| 41 |                                 |     |                                                                                                                                                                                                                                                                                                                                       |                                       |
| 42 |                                 |     |                                                                                                                                                                                                                                                                                                                                       |                                       |
| 43 |                                 |     |                                                                                                                                                                                                                                                                                                                                       |                                       |
| 44 |                                 |     |                                                                                                                                                                                                                                                                                                                                       |                                       |
| 45 |                                 |     |                                                                                                                                                                                                                                                                                                                                       |                                       |
| 46 |                                 |     |                                                                                                                                                                                                                                                                                                                                       |                                       |
| 47 |                                 |     |                                                                                                                                                                                                                                                                                                                                       |                                       |

|    |                               |     |                                                                                                                                                                                                                                                                                     |                                          |
|----|-------------------------------|-----|-------------------------------------------------------------------------------------------------------------------------------------------------------------------------------------------------------------------------------------------------------------------------------------|------------------------------------------|
| 1  |                               |     |                                                                                                                                                                                                                                                                                     |                                          |
| 2  |                               |     |                                                                                                                                                                                                                                                                                     |                                          |
| 3  | Consent or assent             | 26a | Who will obtain informed consent or assent from potential trial participants or authorised surrogates, and how (see Item 32)                                                                                                                                                        | 9                                        |
| 4  |                               |     |                                                                                                                                                                                                                                                                                     |                                          |
| 5  |                               | 26b | Additional consent provisions for collection and use of participant data and biological specimens in ancillary studies, if applicable                                                                                                                                               | 9 & 21                                   |
| 6  |                               |     |                                                                                                                                                                                                                                                                                     |                                          |
| 7  |                               |     |                                                                                                                                                                                                                                                                                     |                                          |
| 8  | Confidentiality               | 27  | How personal information about potential and enrolled participants will be collected, shared, and maintained in order to protect confidentiality before, during, and after the trial                                                                                                | 9                                        |
| 9  |                               |     |                                                                                                                                                                                                                                                                                     |                                          |
| 10 |                               |     |                                                                                                                                                                                                                                                                                     |                                          |
| 11 | Declaration of interests      | 28  | Financial and other competing interests for principal investigators for the overall trial and each study site                                                                                                                                                                       | 24                                       |
| 12 |                               |     |                                                                                                                                                                                                                                                                                     |                                          |
| 13 |                               |     |                                                                                                                                                                                                                                                                                     |                                          |
| 14 | Access to data                | 29  | Statement of who will have access to the final trial dataset, and disclosure of contractual agreements that limit such access for investigators                                                                                                                                     | 26                                       |
| 15 |                               |     |                                                                                                                                                                                                                                                                                     |                                          |
| 16 |                               |     |                                                                                                                                                                                                                                                                                     |                                          |
| 17 | Ancillary and post-trial care | 30  | Provisions, if any, for ancillary and post-trial care, and for compensation to those who suffer harm from trial participation                                                                                                                                                       | 12                                       |
| 18 |                               |     |                                                                                                                                                                                                                                                                                     |                                          |
| 19 |                               |     |                                                                                                                                                                                                                                                                                     |                                          |
| 20 | Dissemination policy          | 31a | Plans for investigators and sponsor to communicate trial results to participants, healthcare professionals, the public, and other relevant groups (eg, via publication, reporting in results databases, or other data sharing arrangements), including any publication restrictions | 3-4 & 20                                 |
| 21 |                               |     |                                                                                                                                                                                                                                                                                     |                                          |
| 22 |                               |     |                                                                                                                                                                                                                                                                                     |                                          |
| 23 |                               | 31b | Authorship eligibility guidelines and any intended use of professional writers                                                                                                                                                                                                      | 3                                        |
| 24 |                               |     |                                                                                                                                                                                                                                                                                     |                                          |
| 25 |                               | 31c | Plans, if any, for granting public access to the full protocol, participant-level dataset, and statistical code                                                                                                                                                                     | 24                                       |
| 26 |                               |     |                                                                                                                                                                                                                                                                                     |                                          |
| 27 |                               |     |                                                                                                                                                                                                                                                                                     |                                          |
| 28 |                               |     |                                                                                                                                                                                                                                                                                     |                                          |
| 29 | <b>Appendices</b>             |     |                                                                                                                                                                                                                                                                                     |                                          |
| 30 |                               |     |                                                                                                                                                                                                                                                                                     |                                          |
| 31 | Informed consent materials    | 32  | Model consent form and other related documentation given to participants and authorised surrogates                                                                                                                                                                                  | Can be provided as Appendix if requested |
| 32 |                               |     |                                                                                                                                                                                                                                                                                     |                                          |
| 33 |                               |     |                                                                                                                                                                                                                                                                                     |                                          |
| 34 |                               |     |                                                                                                                                                                                                                                                                                     |                                          |
| 35 | Biological specimens          | 33  | Plans for collection, laboratory evaluation, and storage of biological specimens for genetic or molecular analysis in the current trial and for future use in ancillary studies, if applicable                                                                                      | Not applicable                           |
| 36 |                               |     |                                                                                                                                                                                                                                                                                     |                                          |
| 37 |                               |     |                                                                                                                                                                                                                                                                                     |                                          |

\*It is strongly recommended that this checklist be read in conjunction with the SPIRIT 2013 Explanation & Elaboration for important clarification on the items. Amendments to the protocol should be tracked and dated. The SPIRIT checklist is copyrighted by the SPIRIT Group under the Creative Commons "[Attribution-NonCommercial-NoDerivs 3.0 Unported](#)" license.
